Title page

Social bonding, gestural complexity and displacement behaviour of wild chimpanzee

Running head: Sociality and gestural complexity

Authors: Anna Ilona Roberts<sup>1</sup> Sam George Bradley Roberts<sup>2</sup>

Affiliations:

<sup>1</sup>Department of Psychology, University of Chester, Chester; Parkgate Road, Chester CH1 4BJ,  
UK

<sup>2</sup>School of Natural Sciences and Psychology, Liverpool John Moores University, Byrom Street,  
Liverpool, L3 3AF

\*Correspondence to: [anna.roberts@chester.ac.uk](mailto:anna.roberts@chester.ac.uk), [S.G.Roberts1@ljmu.ac.uk](mailto:S.G.Roberts1@ljmu.ac.uk)

## **Social bonding, gestural complexity and displacement behaviour of wild chimpanzee**

### **1 Abstract**

2 Kinship and demography affect social affiliation in many different contexts such as co-feeding,  
3 resting, travel, grooming, visual attention and proximity. Chimpanzees may coordinate these  
4 social interactions by using gestural communication to make signaller's goal transparent to the  
5 recipient and also by increasing commitment of the recipient through including rewarding  
6 property in communication. The rewards of gesturing can be measured through the rates of  
7 displacement behaviour made in response to these gestures by the recipient. We tested  
8 hypothesis that gestural communication affects social affiliation after controlling for kinship and  
9 demography in wild, adult chimpanzees living in Budongo Forest, Uganda. We found that  
10 affiliative but not antagonistic gestures positively predicted social affiliation. Contexts differed in  
11 their association with gestures according to complexity and association with displacement  
12 behaviour. More complex, less intense gestures predicted mutual grooming, travel, visual  
13 attention whereas less complex, more intense gestures predicted unidirectional grooming.  
14 Mirroring these patterns, reduced displacement activity occurred in response to gestures  
15 associated with unidirectional grooming but not other contexts. We highlight that these tactical  
16 decisions that wild chimpanzees make in their use of gestural communication may be driven by  
17 complexity of social environment that influences effectiveness with which signalers can influence  
18 the recipient.

19 Keywords: social network, gestural communication, chimpanzee, joint action, resting, travel,  
20 grooming, co-feeding, proximity, visual attention, complexity, function

21

22

23

24

## 25 **Introduction**

26 Social bonds of animals, whereby particular dyads within the group preferentially  
27 associate and affiliate with each other have fitness benefits by regulating within-group  
28 competition in contexts such as feeding and mating. Such relationships have been found in  
29 numerous animal species which include for instance, bottlenose dolphins (*Tursiops aduncus*)  
30 (Möller, Beheregaray, Harcourt, & Krützen, 2001), Bechstein's bats (*Myotis bechsteini*) (Kerth,  
31 Perony, & Schweitzer, 2011), and sperm whales (*Physeter macrocephalus*) (Ortega-Ortiz,  
32 Engelhaupt, Winsor, Mate, & Rus Hoelzel, 2012). By far however, the most dynamic and stable  
33 societies are those of primate species, and particularly great apes such as chimpanzees whereby  
34 conspecifics regularly form social bonds manifest in many different contexts (F. B. M. De Waal,  
35 1982; Goodall, 1986). Unsurprisingly perhaps, considerable research effort has been directed at  
36 explaining the emergence and persistence of social bonds in primates (K. Langergraber, Mitani,  
37 & Vigilant, 2009; John C Mitani, Watts, Pepper, & Merriwether, 2002; J. B. Silk, Seyfarth, &  
38 Cheney, 2018). At first, inclusive fitness behind social bonding with kin was ubiquitously claimed  
39 to drive patterns of social bond formation (Hamilton, 1964). Although primates can and do  
40 socially bond with kin (Wrangham, 1980), the principal role of kinship in driving primate  
41 sociality has been discounted on the basis that in many socially complex primate species such as  
42 gorillas, chimpanzees and the bonobos social bonding within dyads is not determined by kinship  
43 (F. B. de Waal, 1986; John C Mitani et al., 2002; Watts, 1992). One another explanation that has  
44 been provided for existence of social bonds in primates, is that demographic constraints such as  
45 membership of the same age cohort can foster social bonding due to potency of peer influence  
46 on one's behaviour and familiarity inherent in growing up in the same social context (Goldberg  
47 & Wrangham, 1997; Van Schaik & Van Hooff, 1994). For those reasons, primates of same  
48 reproductive status or sex, may also be found to have affiliative contact with each other at a  
49 higher rate than among primates of different reproductive status or sex. For instance, male

50 chimpanzees are more likely to groom with other males than the females (John C Mitani et al.,  
51 2002). Thus, formation of social bonds in primates, often demands that some similarity between  
52 interactants exists (Massen & Koski, 2014). However, primate social groups are complex and  
53 large, and primates often come into contact with conspecifics who are dissimilar and/or  
54 unrelated. For these complex social groups of unrelated individuals to form and persist over  
55 time, the social cohesion mechanism has to evolve that facilitates these social interactions. We  
56 propose that gestural communication defined as voluntary movements of the hands, legs, head,  
57 bodily postures or locomotory gaits (Hewes, 1973; Liebal, Call, & Tomasello, 2004) is one  
58 important mechanisms that facilitates formation of social bonds between individuals regardless  
59 of similarity.

60         The gestural communication is highly variable across species but within species, there is  
61 also a considerable variation that may facilitate choice of a social partner on the basis of several  
62 gesture features. For instance, gestural communication can be multimodal and co-occur with  
63 facial expressions or vocalisations, or it can be unimodal. Primates may incorporate objects such  
64 as branch of a tree in signalling or the gesture may not contain use of objects. Gestures can be  
65 combined with other gestural signals in a single utterance, or gesture may be produced singly (A.  
66 I. Roberts, Vick, Roberts, Buchanan-Smith, & Zuberbühler, 2012). The variation in gestural  
67 communication may be associated with the degree of social bonding, because gestures vary in the  
68 efficiency with which signaller can influence behaviour of the recipient (A. I. Roberts, Vick,  
69 Roberts, & Menzel, 2014). Signals of greater complexity that deviate from the population mean,  
70 may be more effective at influencing the recipient, than the average signals (Dawkins & Guilford,  
71 1997; Zahavi & Zahavi, 1997). There are however many different pathways to achieving a greater  
72 efficiency in gestural communication. Studies in humans, showed that during perception of facial  
73 expression accompanied by direct gaze and pointing, the amygdala processes emotional content  
74 of communication. However, there is a concurrent integration of the directional communication  
75 (pointing, gaze) in the premotor cortex that facilitates re-evaluation of prior expectations

76 regarding perceived signaller's immediate intent from emotional expression alone (Conty,  
77 Dezecache, Hugueville, & Grèzes, 2012). Thus, pointing gestures with facial expressions have a  
78 greater signal value than facial expressions alone and they can elicit a more accurate response  
79 from the recipient. Recently studies documented similar behavioural strategies in primates (S.  
80 Roberts & A. I. Roberts, 2018). Chimpanzee females, for example, lower back to make infant  
81 climb on it for travel as well as combining this bodily gesture with a manual sweep backwards in  
82 direction of the infant, potentially using manual directional gesture to draw the attention of the  
83 infant to the bodily gesture even though the infant is only a meter away and can respond to  
84 bodily gesture alone. When initiating grooming, male chimpanzee may present the bodily part  
85 that he wants to be groomed by the recipient, as well as making almost imperceptible sound to  
86 an observer standing only a short distance away, but clearly of fundamental importance to the  
87 recipient.

88         The social relationships of primates, however, may not always be guided by selection for  
89 effectiveness of communication (Dawkins & Guilford, 1997). If both interactants have mutual  
90 interest in signalling and responding then the recipient may become sensitive to the signaller,  
91 whereas signaller may make communication less complex. These scenarios are evolutionarily  
92 stable because the communication is effective at achieving its desired goal, whilst reducing the  
93 costs of potential harassment by third party or predators in circumstances when the signal is  
94 conspicuous and large. An example would be left handed gesture seen in a common goal  
95 contexts signifying stronger social bonding (e.g. mutual grooming, joint travel, mutual visual  
96 monitoring) versus right handed gestures seen in contexts whereby interactants do not have a  
97 common goal signifying weaker social bonding (e.g. unidirectional grooming, lack of mutual  
98 visual monitoring) (Noë, 2006). Studies have recently emphasized how low intensity of  
99 communication is important for fitness by reducing stress inherent in social interaction  
100 (Nakayama, Goto, Kuraoka, & Nakamura, 2005; A. I. Roberts & S. G. B. Roberts, 2016). When  
101 individuals who are less strongly bonded interact, there may be a greater conflict of interest and

102 therefore low intensity communication may be ineffective at influencing behavioural change in  
103 the recipient (Dawkins & Guilford, 1997). There is a wealth of studies that describe the  
104 phenomena whereby recipients respond more strongly to visual communication that is complex  
105 than to visual communication that is non-complex. Possibly, the most well-known are the  
106 elaborations and repetitions of visual signals seen in mating contexts. For instance, male frogs  
107 incorporating a higher rate of action repetition in visual display are more likely to attract female  
108 for mating than the males incorporating lower rate of action repetition in the visual display  
109 (PAYNE & PAGEL, 1997).

110         Complex visual signals as effective means of signalling, however, may reach a limit at  
111 which further increasing of complexity will not have any bearing on effectiveness of interaction  
112 with the recipient. Another way, in which signallers can influence efficiency of their signalling is  
113 by stimulating the reward system of the recipient. By making a gesture rewarding, signaller  
114 enhances recipient's commitment to the interaction, thereby making these social relationships  
115 possible. Such circumstances, for instance, may be present in complex social settings, whereby  
116 presence of other conspecifics in vicinity, provides competitive background against which  
117 signaller competes for attention of the recipient. By increasing their rewarding value, signals  
118 become more pleasurable to the receivers and to that extent become more capable of evoking a  
119 response from the recipient. During grooming, chimpanzees sometimes direct visual gestures to  
120 make the recipient present body for grooming, but when recipient is unresponsive they switch to  
121 gentle, but more intense tactile gestures to achieve their goal (A. I. Roberts, Vick, & Buchanan-  
122 Smith, 2013). Higher intensity signals are more perceivable by the receivers and by virtue of  
123 being more intense can exert greater influence on the recipient (Zahavi & Zahavi, 1997).  
124 Subordinate male chimpanzees for instance, use visual gestures designed to attract female for  
125 mating in absence of visual attention from the dominant male, but these gestures become intense  
126 and loud when the female is unresponsive because the dominant male is watching the interaction  
127 (A. I. Roberts & Roberts, 2015). High intensity however, can reduce or even reverse the

128 preference for signals that are based on complexity of structure hence high intensity signals can  
129 become less complex (Gerhardt & Doherty, 1988). For instance, chimpanzee visual gestures are  
130 often accompanied by high complexity such as use of mutual attention, low intensity call or  
131 synchronized call in contrast to tactile and auditory gestures that are less often accompanied by  
132 these characteristics (S. Roberts & A. I. Roberts, 2018).

133 Final issue of importance for establishing which communication characteristics can  
134 influence preference for social affiliation is the positive versus negative communication style.  
135 Maestriperi and colleagues (1999, 2005) were amongst the first to recognize that affiliative as  
136 opposed to antagonistic gestural communication was of profound importance to the likelihood  
137 of social affiliation. Comparing three species of macaques with different social styles, they were  
138 able to show that more tolerant macaque species where the influence of kinship on social  
139 relationships was reduced displayed a larger repertoire of affiliative communication when  
140 compared to less tolerant macaque species where the influence of kinship was stronger. In more  
141 tolerant macaque species social interactions can easily disintegrate in response to exposure to  
142 aggression demanding higher investment in repair through affiliative communication. More  
143 recently, a study of a wild chimpanzee group showed that higher rates of affiliative gestural  
144 communication relative to antagonistic gestural communication predict a longer duration of time  
145 spent in proximity (S. G. B. Roberts & A. I. Roberts, 2016).

146 Chimpanzees, *Pan troglodytes*, are particularly good model species to illustrate how gestural  
147 communication affects primate social affiliation. Chimpanzees, live in large, fission-fusion social  
148 groups of up to 120 individuals, associating and affiliating in subgroups of varying duration and  
149 composition (Goodall, 1986). Due to fission-fusion nature of social system, mother and maternal  
150 kin are often unavailable as social partners demanding that chimpanzees form social bonds with  
151 unrelated group members (Goldberg & Wrangham, 1997; John C Mitani et al., 2002). The  
152 chimpanzees derive fitness benefits of social affiliation with unrelated group members in many

153 different contexts such as grooming, coalitions, sharing meat, and hunting (Boesch, 1996;  
154 Foerster et al., 2015; Goldberg & Wrangham, 1997; K. E. Langergraber, Mitani, & Vigilant,  
155 2007). Recent research has generated proofs that gestural communication of chimpanzees can  
156 influence preference for social affiliation. For example, recent studies have demonstrated the link  
157 between proximity measures (an index of sociality) and a number of different indices of  
158 communicative complexity such as intentionality (A. I. Roberts, 2018; A. I. Roberts & S. G. B.  
159 Roberts, 2018), repertoire size (A. I. Roberts, Chakrabarti, & Roberts, 2019) and multimodality  
160 (S. Roberts & A. I. Roberts, 2018). Whereas the role of gestures in maintaining proximity has  
161 been made clear, the role of gestural communication has received only limited research attention  
162 with regard to its influence on any other aspect of social affiliation in primates. However, in  
163 order to develop a deeper understanding of the factors driving social relationships, several  
164 measures of the social complexity are needed. As well as proximity, primates use visual attention  
165 to monitor conspecifics and also preferentially associate with others during grooming, feeding,  
166 resting and travel (Nishida, Zamma, Matsusaka, Inaba, & McGrew, 2010). All these different  
167 modes of interaction contribute to forming social relationships (Hinde, 1976). Studies which only  
168 focus on one behavioural aspect may therefore miss important features of social relationships.

169 Here we provide first systematic test of the hypothesis that gestural communication can  
170 influence preference of the recipient to form social relationships with the signaller. First, to test  
171 this hypothesis we use social network analysis to determine the link between communication and  
172 social bonding behaviours. Social network analysis represents individuals as nodes (e.g. individual  
173 A or B) and the social relationships (e.g. duration of time spent travelling, per hour spent within  
174 10 m between AB dyad) as the edge or a 'tie'. Social network analysis examines how increase in  
175 the value of one variable produced by a dyad is associated with the increase or decrease in the  
176 value of another variable by a dyad (Croft, James, & Krause, 2010). For instance, if individual A  
177 directs tactile gestures and grooming at the individual B, then social network analysis can  
178 determine whether the rate of tactile gestures directed by individual A at the individual B is



179 associated with increase or decrease in the duration of time individual A spends grooming  
180 individual B.

181         It has long been established that animal signals evolve to function effectively in a  
182 particular social environment. The variation in the conflict of interest between signaler and the  
183 recipient is reflected in how effectively different types of gesturing can influence social bonding.  
184 When social bonds are weaker, and the conflict of interest between signaler and the recipient is  
185 high, chimpanzees use more effective, and intense gestures (e.g. tactile, auditory). In contrast,  
186 when the social bonds are stronger and the conflict of interest is low, chimpanzees use less  
187 effective and less intense gestures (e.g. visual). However, intensity of gestures affects the  
188 specificity with which signaller can convey their goal of the interaction. Low intensity, visual  
189 gestures are less specific to context than more intense tactile or auditory gestures. Lack of  
190 specificity may affect the recipient's ability to effectively decode signal meaning and thus respond  
191 adaptively. One would therefore predict that communicative complexity would more likely co-  
192 occur with less intense gestures (e.g. visual) than with more intense gestures to enable the  
193 signaller to increase specificity of the gestures so that the recipient can decode signal meaning.  
194 Thus, one may predict that low intensity, complex signals will co-occur with indices of stronger  
195 social bonding (e.g. mutual grooming, joint travel), whereas higher intensity, non-complex signals  
196 will co-occur with indices of weaker social bonding (e.g. unidirectional grooming). In addition, it  
197 seems reasonable to assume that style of the gestural communication will affect the efficiency  
198 with which individuals can form social relationships. For instance, more bonded partners may  
199 exhibit a higher rate of gestures used in affiliation contexts as compared with antagonistic  
200 contexts because signaller gestures affiliatively to increase duration of social bonding. However,  
201 to date, this association between social relationships and complexity of gestural communication  
202 has not been examined systematically.

203           Second, we determine whether displacement behaviours such as self-scratching that help  
204 primates cope with anxiety (Aureli & Schaik, 1991; Baker & Aureli, 1997; Castles & Whiten,  
205 1998; Diezinger & Anderson, 1986; Schino, Perretta, Taglioni, Monaco, & Troisi, 1996) are  
206 associated with gestural communication that facilitates social bonding. Studies of long-tailed  
207 macaques (Aureli & Schaik, 1991), olive baboons (Castles & Whiten, 1998) and chimpanzees  
208 (Baker & Aureli, 1997) have all used scratching to reliably estimate primate's level of anxiety.  
209 Chimpanzees may experience increased anxiety in situations of social uncertainty linked to  
210 presence of unpredictable social partners with whom social interactions are infrequent or  
211 dominance relationships have been unresolved (Aureli, 1997; Schino, Scucchi, Maestriperi, &  
212 Turillazzi, 1988). In this case, one may predict that communication aimed at these social partners  
213 may be associated with higher rate of signaller's displacement activity. Furthermore, chimpanzees  
214 may experience reduced anxiety in response to communication that has a rewarding property.  
215 For instance, vocal communication can prompt a surge in the production of social  
216 neurohormones in the recipient, such as a surge of oxytocin that relieves anxiety (Feldman,  
217 Gordon, & Zagoory-Sharon, 2011). In this case, it would be predicted that communication  
218 associated with weaker social bonds would be associated with reduced rate of displacement  
219 activity in the recipient.

## 220 **Methods**

221           Twelve adult East African chimpanzees (*Pan troglodytes schweinfurthii*) (6 males and 6  
222 females) were observed for a mean (SD) duration of 751.5 (250.9) min per each focal individual  
223 (Table 1). The sample included almost all of the uninjured adult males in the community and to  
224 match the sample size of the males, a similar number of uninjured females was chosen as focal  
225 individuals. The subjects were chosen on the basis that they were lacking physical injury, because  
226 the injuries such as deformation of the hand by the snare can influence the type of  
227 communication used. Moreover, the sample of males and females was matched as closely as

228 possible in terms of rank categories, including three low ranking and three high ranking males  
229 and females).

230 The chimpanzees lived in the tropical forest, Sonso community at the Budongo  
231 Conservation Field Station in Uganda, East Africa. The data was collected during 18 minute  
232 focal animal follows, consisting of 9 scans at 2 minute intervals, recording the activity of the  
233 focal individual (grooming, travel, resting, feeding), the visual attention, activity and proximity of  
234 the nearest neighbor and the identity of all individuals present within 10 m (see Table 2 for  
235 definitions). Chimpanzees in the wild, especially when present in large parties, can change  
236 behavior and activity frequently. Thus, in order to reduce variability within samples, a focal  
237 follow of 18 minute duration was chosen. Gestures were recorded continuously using a digital  
238 video camera, verbally recording directly onto the footage the identity and the behavior of the  
239 signaler and recipient, along with the goal directedness in the behavior and the functional  
240 context.

241 Using the video footage, the inventory identified gestures as acts of non-verbal behavior  
242 that were expressive movements of the limbs, head or the body posture that were intentional,  
243 communicative and mechanically ineffective. The detailed description of intentionality coding,  
244 along with the video clips of each gesture type, has been described previously (A. I. Roberts,  
245 Roberts, & Vick, 2014; A. I. Roberts, Vick, & Buchanan-Smith, 2012; A.I. Roberts et al., 2012).  
246 Validation of the coding procedure was established by a second coder and reliability (Kappa  
247 coefficient, K) was good for function ( $K = 0.70$ ), modality of gesturing ( $K = 0.946$ ) and  
248 intentionality ( $K = 0.74$ ) (S. G. B. Roberts & A. I. Roberts, 2016). The behavioural measures  
249 (e.g. joint feeding, mutual grooming) were calculated as the duration of time pairs of  
250 chimpanzees engaged in these behaviors, per hour they spent within 10 m. The definitions as  
251 well as mean  $\pm$  SD for all variables entered into the models can be found in Tables 2 and 3.  
252 Dyads were classified according to maternal kinship, sex, age class and reproductive state. All

253 communication measures were calculated as a rate per hour chimpanzees spent within 10 m (see  
254 Supplementary Table 1 for definitions).

255 The rates of communication and durations of behavior were used to construct weighted,  
256 directed networks. The data was transformed and analyzed using UCINET 6 for Windows  
257 (Borgatti, Everett, & Johnson, 2013). The data used in social network matrices is dependent and  
258 therefore analysis using randomization (or permutation) have been developed, where the  
259 observed value is compared against a distribution of values generated by a large number of  
260 random permutations of the networks. The  $p$  value is calculated by calculating the proportion of  
261 random permutations in which a value as large (or as small) as the one observed is present. The  
262 relationships between networks were analyzed using Multiple Regression Quadratic Assignment  
263 Procedure (MRQAP) (Borgatti et al., 2013). This regression technique resembles a standard  
264 regression model as it enables us to examine the association between a number of predictor  
265 variables (e.g. rates of gestural communication between dyads, control variables relating to sex  
266 and age differences of dyads) and a single dependent variable (e.g. duration of proximity between  
267 dyads). We used Double Dekker Semi Partialling MRQAP regression as it is more robust against  
268 the effects of network autocorrelation and skewness in the dataset than other forms of network  
269 regression (Dekker, Krackhardt, & Snijders, 2007). For this analysis, 2,000 permutations were  
270 used following the settings of UCINET.

271 Running large numbers of models risks inflating significance levels (Field, 2013). To  
272 address this issue, following the methods used by Pearce et al. (2017), we examined whether the  
273 overall distribution of significant results varied across the different domains of sociality (joint  
274 activity, grooming, visual attention, proximity and scratch) and behavioural categories. These  
275 data are not subject to potential problems arising from multiple comparisons effects because the  
276  $p$  value is used to categorise the results in each category as statistically significant or not, and one  
277 chi-square test is then carried out on the overall distribution of results (Pearce et al., 2017). Thus,

278 we used a Chi-square test to examine the overall pattern of association between the behavioral  
279 indices and gestural communication. Following the same method as Pearce et al. (2017), this  
280 allowed us to examine whether the significant associations between gestural communication and  
281 behavior showed a distinct pattern, with certain types of gestural communication associated with  
282 specific behavioral indices more commonly than would be expected, as compared to a random  
283 distribution. This method is used as an alternative to Bonferroni correction when the multiple  
284 comparisons prevent the Bonferroni correction being used (M. J. Silk, Jackson, Croft, Colhoun,  
285 & Bearhop, 2015). We created contingency table whereby we included percentage of significant  
286 associations ( $p < 0.05$ ) with each variable within each domain of social complexity  
287 (Supplementary Table 2). The results showed that the distribution of significant associations was  
288 non-random ( $\chi^2 = 364.90$ ,  $df = 60$ ,  $p < 0.001$ ). This demonstrated that the significant results  
289 were not randomly distributed across the different domains of sociality, suggesting that different  
290 types of gestural communication are differentially associated with the types of sociality. In all  
291 tests, two-tailed probabilities were used, with  $p$  set at  $< 0.05$ . Supplementary Information 2 gives  
292 a summary of these findings, with the full models provided in Supplementary Information 1  
293 (Tables S3 – S19).

## 294 **Results**

295 Based on our 12 focal subjects, we studied directed patterns of social behaviour in pairs  
296 of chimpanzees, giving 132 unique dyadic relationships (e.g. the duration of grooming given by  
297 BB to HW, and the duration of grooming given by HW to BB). There was a great deal of  
298 variation in the rate of social behaviours amongst the dyads and across the different behaviours,  
299 as indicated by the fact that for all of the behaviours the standard deviation was larger than the  
300 mean (Table 2). Per hour spent within 10 m, the mean  $\pm$  SD number of minutes dyads spent in  
301 social behaviours ranged between  $0.44 \pm 1.58$  spent in joint travel and  $6.16 \pm 10.05$  spent in close  
302 proximity (within 2 m). Dyads scratched at a mean rate  $\pm$  SD of  $0.64 \pm 1.68$  instances of

303 scratching, per hour spent within 10 m. Similarly for the communication indices, there was a  
304 large amount of variation between dyads, with lowest mean  $\pm$  SD rate of behaviour for gestures  
305 accompanied by facial expression ( $0.09 \pm 0.52$ ) and the highest mean  $\pm$  SD rate of events ( $3.18$   
306  $\pm 7.82$ ) – Supplementary Table 2.

### 307 **Association between the duration of social behaviour and gestural communication** 308 **categorized according to structure**

309 In the next set of analyses, we used MRQAP network regression analyses to examine how the  
310 duration of social behaviours (the dependent variable in all the models) was associated with the  
311 rate of different types of gestural communication and demography (see Figures 1 and 2 for visual  
312 representation of the networks).

#### 313 *Joint feeding*

314 Same sex dyads ( $\beta = 0.31, p = 0.001$ ), kin ( $\beta = 0.29, p = 0.010$ ) and same reproductive status ( $\beta$   
315  $= 0.22, p = 0.040$ ) dyads spent a significantly longer amount of time engaged in joint feeding, as  
316 compared to different sex dyads, unrelated dyads or different reproductive status dyads. Dyads  
317 who spent a longer amount of time jointly feeding had a significantly higher rate of auditory  
318 short-range gestures ( $\beta = 0.21, p = 0.040$ ) and significantly lower rate of tactile gestural  
319 communication ( $\beta = -0.22, p = 0.004$ ).

#### 320 *Joint resting*

321 Same age dyads, as compared to different age dyads, spent a significantly longer amount of time  
322 engaged in joint resting ( $\beta = 0.29, p = 0.003$ ). There was a positive association between the  
323 duration of time spent in joint resting and the rate of auditory short-range ( $\beta = 0.13, p = 0.040$ )  
324 and close proximity ( $\beta = 0.12, p = 0.046$ ) gestures.

#### 325 *Joint travel*

326 Same-age dyads, as compared to different-age dyads, spent a significantly longer amount of time  
327 jointly travelling ( $\beta = 0.28, p = 0.010$ ). Further, the duration of joint travel was positively  
328 associated with a higher rate of gestural communication without objects ( $\beta = 0.47, p = 0.005$ ),  
329 visual ( $\beta = 0.62, p = 0.010$ ), unimodal ( $\beta = 0.22, p = 0.020$ ) and multimodal with facial  
330 expression ( $\beta = 0.30, p = 0.020$ ), combined ( $\beta = 0.41, p = 0.004$ ), accompanied by mutual  
331 attention present ( $\beta = 0.37, p = 0.010$ ), bodily ( $\beta = 0.50, p = 0.003$ ), manual indicative ( $\beta = 0.42,$   
332  $p = 0.011$ ), close ( $\beta = 0.27, p = 0.015$ ) and far ( $\beta = 0.22, p = 0.013$ ), non-repetitive ( $\beta = 0.55, p =$   
333  $0.006$ ), homogeneous ( $\beta = 0.43, p = 0.010$ ), single (no sequence) ( $\beta = 0.22, p = 0.026$ ), rapid ( $\beta =$   
334  $0.20, p = 0.020$ ) and persistence sequence ( $\beta = 0.14, p = 0.045$ ), and accompanied by piloerection  
335 ( $\beta = 0.38, p = 0.006$ ), The repertoire size of gesture types ( $\beta = 0.34, p = 0.010$ ) and number of  
336 events exchanged by each dyad ( $\beta = 0.39, p = 0.003$ ) was positively associated with the duration  
337 of joint travel. In contrast, a higher rate of auditory long-range gestures was associated with  
338 shorter durations of time spent in joint travel ( $\beta = -0.28, p = 0.010$ ).

### 339 *Grooming given*

340 Same-age dyads spent significantly longer engaged in giving grooming ( $\beta = 0.21, p = 0.020$ ). The  
341 duration of time spent giving grooming was positively associated with a higher rate of  
342 production of following categories of gestural communication: no object ( $\beta = 0.64, p = 0.001$ ),  
343 auditory short-range ( $\beta = 0.73, p = 0.001$ ), auditory long-range ( $\beta = 0.19, p = 0.010$ ), tactile ( $\beta =$   
344  $0.41, p = 0.001$ ), unimodal ( $\beta = 0.75, p = 0.001$ ), dyadic repertoire size ( $\beta = 0.26, p = 0.020$ ),  
345 single (non-combined) ( $\beta = 0.64, p = 0.001$ ), mutual attention absent ( $\beta = 0.78, p = 0.001$ ),  
346 bodily ( $\beta = 0.22, p = 0.023$ ), manual ( $\beta = 0.29, p = 0.016$ ), events ( $\beta = 0.46, p = 0.002$ ), manual  
347 indicative ( $\beta = 0.17, p = 0.036$ ), manual non-indicative ( $\beta = 0.35, p = 0.014$ ), close ( $\beta = 0.76, p =$   
348  $0.001$ ), repetitive ( $\beta = 0.60, p = 0.001$ ), homogenous ( $\beta = 0.52, p = 0.004$ ) and single (no  
349 sequence) ( $\beta = 0.66, p = 0.001$ ). In contrast, the dyads who spent a shorter duration of time  
350 giving grooming communicated at a higher rate through the use of objects ( $\beta = -0.20, p = 0.010$ ),

351 visual gesture ( $\beta = -0.26, p = 0.010$ ), multimodal (facial expression) ( $\beta = -0.23, p = 0.010$ ),  
352 combined ( $\beta = -0.19, p = 0.020$ ), mutual attention present ( $\beta = -0.11, p = 0.040$ ) and far ( $\beta = -$   
353  $0.11, p = 0.012$ ).

#### 354 *Grooming mutual*

355 Same age dyad partners spent a longer duration of time mutually grooming ( $\beta = 0.20, p = 0.049$ ).

356 A longer duration of time spent mutually grooming was also associated with a higher rate of the  
357 following gesture types: no object ( $\beta = 0.64, p < 0.001$ ), visual ( $\beta = 0.88, p < 0.001$ ), unimodal ( $\beta$   
358  $= 0.27, p = 0.020$ ), multimodal (facial expression) ( $\beta = 0.44, p = 0.002$ ), dyadic repertoire size ( $\beta$   
359  $= 0.45, p = 0.003$ ), combined ( $\beta = 0.40, p = 0.003$ ), mutual attention present ( $\beta = 0.63, p =$   
360  $0.001$ ), bodily ( $\beta = 0.58, p = 0.001$ ), events ( $\beta = 0.45, p = 0.003$ ), manual indicative ( $\beta = 0.56, p =$   
361  $0.001$ ), non-repetitive ( $\beta = 0.72, p = 0.001$ ), homogeneous ( $\beta = 0.60, p < 0.001$ ), close ( $\beta = 0.38,$   
362  $p = 0.004$ ), far ( $\beta = 0.22, p = 0.018$ ), single (no sequence) ( $\beta = 0.33, p = 0.012$ ), rapid ( $\beta = 0.16, p$   
363  $= 0.041$ ) and persistence sequence ( $\beta = 0.16, p = 0.030$ ) and piloerection ( $\beta = 0.42, p = 0.004$ ).

364 In contrast, a higher rate of gestures object ( $\beta = -0.15, p = 0.020$ ), auditory long range ( $\beta = -0.51,$   
365  $p < 0.001$ ), repetitive ( $\beta = -0.18, p = 0.004$ ) and heterogeneous ( $\beta = -0.15, p = 0.016$ ) predicted a  
366 shorter duration of time spent mutually grooming.

#### 367 *Grooming received*

368 Same-sex dyads, compared to different-sex dyads, spent a significantly longer amount of time  
369 receiving grooming ( $\beta = 0.20, p = 0.030$ ). Individuals who received a longer duration of  
370 grooming from the dyad partners produced gestures with no object ( $\beta = 0.22, p = 0.040$ ), visual  
371 ( $\beta = 0.50, p = 0.020$ ), unimodal ( $\beta = 0.25, p = 0.040$ ), bodily ( $\beta = 0.25, p = 0.036$ ), manual  
372 indicative ( $\beta = 0.17, p = 0.046$ ), non-repetitive ( $\beta = 0.20, p = 0.035$ ) and homogeneous ( $\beta = 0.17,$   
373  $p = 0.048$ ) at a higher rate. However, individuals who received a shorter duration of grooming  
374 from the dyad partner directed auditory long range ( $\beta = -0.27, p = 0.020$ ) and tactile ( $\beta = -0.20, p$   
375  $< 0.001$ ) gestures at them at a higher rate.



376 *Attention present*

377 Presence of mutual attention occurred between dyads of same-sex ( $\beta = 0.30, p = 0.010$ ) and  
378 same reproductive status ( $\beta = 0.28, p = 0.040$ ) at a higher rate. Individuals who spent longer  
379 duration of time mutually attending with the dyad partner displayed a significantly higher rate of  
380 gestures with no object ( $\beta = 0.69, p < 0.001$ ), visual ( $\beta = 0.75, p < 0.001$ ), auditory short-range ( $\beta$   
381  $= 0.24, p = 0.010$ ), unimodal ( $\beta = 0.44, p < 0.001$ ), multimodal (facial expression) ( $\beta = 0.31, p =$   
382  $0.003$ ), dyadic repertoire size ( $\beta = 0.42, p = 0.002$ ), single (non-combined) ( $\beta = 0.29, p = 0.004$ ),  
383 combined ( $\beta = 0.30, p = 0.002$ ), mutual attention present ( $\beta = 0.56, p < 0.001$ ), bodily ( $\beta = 0.54,$   
384  $p = 0.001$ ), events ( $\beta = 0.47, p = 0.001$ ), manual indicative ( $\beta = 0.54, p = 0.001$ ), close ( $\beta = 0.50,$   
385  $p = 0.001$ ), far ( $\beta = 0.13, p = 0.045$ ), non-repetitive ( $\beta = 0.56, p = 0.004$ ), homogeneous ( $\beta =$   
386  $0.60, p = 0.001$ ), single (no sequence) ( $\beta = 0.47, p = 0.001$ ) and piloerection ( $\beta = 0.35, p = 0.005$ ).  
387 In contrast, individuals who spent a shorter duration of time mutually attending with the dyad  
388 partner displayed a significantly higher rate of gestures with object ( $\beta = -0.18, p = 0.003$ ),  
389 auditory long-range ( $\beta = -0.44, p < 0.001$ ), multimodal (vocal) ( $\beta = -0.09, p < 0.049$ ) and  
390 heterogeneous ( $\beta = -0.09, p = 0.046$ ).

391 *Attention absent*

392 Same-aged dyad partners spent a longer duration of time mutually non-attending towards one  
393 another as compared to different age partners ( $\beta = 0.36, p = 0.001$ ). The duration of time dyad  
394 partners spent mutually non-attending was positively associated with the rates of gestures with  
395 no object ( $\beta = 0.24, p = 0.028$ ), auditory short-range ( $\beta = 0.29, p = 0.011$ ), unimodal ( $\beta = 0.27, p$   
396  $= 0.024$ ), single (non-combined) ( $\beta = 0.18, p = 0.045$ ), mutual attention absent ( $\beta = 0.28, p =$   
397  $0.015$ ), events ( $\beta = 0.15, p = 0.049$ ), close ( $\beta = 0.28, p = 0.021$ ), single (no sequence) ( $\beta = 0.23, p$   
398  $= 0.026$ ) and homogeneous ( $\beta = 0.17, p = 0.043$ ).

399 *Proximity*

400 In comparison with different-age dyad partners, same-age dyad partners ( $\beta = 0.32, p < 0.001$ )  
401 spent a significantly longer duration of time in close proximity (within 2 m). There was a  
402 significant positive association between the duration of time spent in close proximity and a  
403 higher rate of a wide range of communication: no object ( $\beta = 0.56, p < 0.001$ ), visual ( $\beta = 0.45, p$   
404  $= 0.010$ ), auditory short-range ( $\beta = 0.34, p = 0.010$ ), unimodal ( $\beta = 0.44, p = 0.001$ ), multimodal  
405 (facial expression) ( $\beta = 0.14, p = 0.049$ ), dyadic repertoire size ( $\beta = 0.28, p = 0.010$ ), combined ( $\beta$   
406  $= 0.29, p = 0.010$ ), mutual attention absent ( $\beta = 0.26, p = 0.010$ ), mutual attention present ( $\beta =$   
407  $0.30, p = 0.010$ ), bodily ( $\beta = 0.40, p = 0.003$ ), events ( $\beta = 0.37, p = 0.003$ ), manual indicative ( $\beta =$   
408  $0.37, p = 0.007$ ), close ( $\beta = 0.48, p = 0.001$ ), non-repetitive ( $\beta = 0.33, p = 0.012$ ), homogeneous  
409 ( $\beta = 0.45, p < 0.001$ ), single (no sequence) ( $\beta = 0.42, p < 0.001$ ) and piloerection ( $\beta = 0.21, p =$   
410  $0.027$ ). In contrast, there was a significant negative association between the duration of time  
411 spent in close proximity and the rate of gestures using object ( $\beta = 0.17, p = 0.003$ ), auditory  
412 long-range ( $\beta = -0.27, p = 0.010$ ) and multimodal (vocal) ( $\beta = -0.11, p = 0.040$ ).

#### 413 *Scratch produced*

414 We further examined how the rate of scratch produced was related to the rates of  
415 communication using MRQAP (Fig. 1). Same-sex dyad partners had a higher rate of scratch  
416 produced than different-sex dyad partners ( $\beta = 0.20, p = 0.039$ ). A higher rates of scratch  
417 produced were positively associated with higher rates of the following types of gestures: no  
418 object ( $\beta = 0.40, p = 0.004$ ), visual ( $\beta = 0.48, p = 0.008$ ), unimodal ( $\beta = 0.18, p = 0.049$ ),  
419 multimodal (facial expression) ( $\beta = 0.18, p = 0.042$ ), dyadic repertoire size ( $\beta = 0.35, p = 0.002$ ),  
420 single (non-combined) ( $\beta = 0.25, p = 0.016$ ), mutual attention present ( $\beta = 0.52, p = 0.001$ ),  
421 bodily ( $\beta = 0.54, p < 0.001$ ), events ( $\beta = 0.36, p = 0.003$ ), manual indicative ( $\beta = 0.40, p = 0.003$ ),  
422 close ( $\beta = 0.21, p = 0.023$ ), far ( $\beta = 0.24, p = 0.001$ ), non-repetitive ( $\beta = 0.41, p = 0.004$ ),  
423 homogeneous ( $\beta = 0.37, p = 0.002$ ), persistence ( $\beta = 0.57, p < 0.001$ ) and piloerection ( $\beta = 0.23,$   
424  $p = 0.022$ ). There was a significant negative association between rates of scratch produced and

425 the rates of auditory long-range ( $\beta = -0.16, p = 0.046$ ) and manual ( $\beta = -0.18, p = 0.011$ )  
426 gestures.

427 *Scratch received*

428 Same-sex dyad partners had a higher rate of scratch received than different-sex dyad partners ( $\beta$   
429  $= 0.20, p = 0.043$ ). There was a significant negative association between rate of scratch received  
430 and the rate of auditory short-range gestures ( $\beta = -0.010, p = 0.049$ ), gestures accompanied by  
431 mutual attention absent ( $\beta = -0.13, p = 0.049$ ), close proximity ( $\beta = -0.11, p = 0.048$ ), repetitive  
432 ( $\beta = -0.44, p = 0.044$ ) and single (no sequence) ( $\beta = -0.14, p = 0.044$ ) gestures.

433 **Association between the duration of social behaviour and gestural communication**  
434 **categorized according to function**

435 We examined whether the duration of social behaviours (the dependent variable in all the  
436 models) was associated with the rate of different types of gestural communication categorized  
437 according to function. Chimpanzee dyads that produced higher rates of gesture threat to  
438 dominate spent a shorter duration of time jointly feeding ( $\beta = -0.50, p = 0.045$ ), mutually  
439 grooming ( $\beta = -0.65, p = 0.006$ ) and visually attending to each other ( $\beta = -0.64, p = 0.004$ ).  
440 Gestures to give groom predicted a longer duration of time spent in jointly feeding ( $\beta = 0.17, p$   
441  $= 0.039$ ), giving grooming ( $\beta = 0.69, p < 0.001$ ), attention present ( $\beta = 0.25, p = 0.011$ ) and  
442 absent ( $\beta = 0.24, p = 0.019$ ), proximity ( $\beta = 0.30, p = 0.007$ ). Further gestures to give groom  
443 elicited significantly lower rates of scratch received ( $\beta = -0.15, p = 0.020$ ). Chimpanzee dyads  
444 that had higher rates of gestures in the context of mutual grooming spent a longer duration of  
445 time in mutual grooming ( $\beta = 1.14, p = 0.010$ ) and visually attending to each other ( $\beta = 0.79, p =$   
446  $0.025$ ). Gestures to receive grooming were positively associated with the duration of time spent  
447 jointly feeding ( $\beta = 0.47, p = 0.012$ ), giving grooming ( $\beta = 0.20, p = 0.036$ ), mutual grooming ( $\beta$   
448  $= 0.53, p = 0.008$ ), receiving grooming ( $\beta = 0.90, p = 0.001$ ), attention present ( $\beta = 0.51, p =$   
449  $0.001$ ) and absent ( $\beta = 0.38, p = 0.022$ ) and proximity ( $\beta = 0.55, p = 0.006$ ). Higher rate of other

450 threat gestures was negatively associated with a longer duration of time spent giving grooming ( $\beta$   
451 = -0.06,  $p = 0.029$ ) and were positively associated with a higher rate of scratch produced ( $\beta =$   
452 0.48,  $p = 0.002$ ). Synchronized high-intensity panthoot was negatively associated with attention  
453 absent ( $\beta = -0.09$ ,  $p = 0.049$ ), proximity ( $\beta = -0.10$ ,  $p = 0.012$ ) and scratch received ( $\beta = -0.13$ ,  $p$   
454 = 0.019). Synchronized low-intensity panthoot was positively associated with joint feeding ( $\beta =$   
455 0.14,  $p = 0.043$ ), travel ( $\beta = 0.26$ ,  $p = 0.012$ ), attention present ( $\beta = 0.10$ ,  $p = 0.048$ ) and absent  
456 ( $\beta = 0.13$ ,  $p = 0.035$ ) and proximity ( $\beta = 0.14$ ,  $p = 0.023$ ). A higher rates of play gestures were  
457 positively associated with the duration of give grooming ( $\beta = 0.10$ ,  $p = 0.010$ ) and negatively  
458 associated with the duration of time spent jointly feeding ( $\beta = -0.19$ ,  $p = 0.004$ ), mutual ( $\beta = -$   
459 0.10,  $p = 0.012$ ) and received grooming ( $\beta = -0.20$ ,  $p = 0.002$ ), attention present ( $\beta = -0.09$ ,  $p =$   
460 0.017) and proximity ( $\beta = -0.08$ ,  $p = 0.046$ ). Higher rates of greeting gestures were associated  
461 with a longer duration of time spent giving grooming ( $\beta = 0.11$ ,  $p = 0.025$ ) and a shorter  
462 duration of time spent receiving grooming ( $\beta = -0.08$ ,  $p = 0.041$ ). Finally, higher rates of travel  
463 gestures were positively associated with a longer duration of time spent giving grooming ( $\beta =$   
464 0.10,  $p = 0.034$ ) and travel ( $\beta = 0.10$ ,  $p = 0.048$ ).

## 465 **Discussion**

466 Most studies of chimpanzee social relationships in the wild or in captivity focus on one  
467 aspect of relationships, such as proximity (A. I. Roberts & S. G. B. Roberts, 2016; A. I. Roberts  
468 & Roberts, 2017; S. G. B. Roberts & A. I. Roberts, 2016). Here we provide first systematic  
469 evidence that chimpanzees form social relationships across many different contexts more  
470 effectively with those individuals with whom they communicate through gestural  
471 communication.

472 Previous research on male chimpanzees suggested that maternal kinship did not play a  
473 critical role in social relationships. Thus, chimpanzees who shared the same mother did not  
474 affiliate or cooperate more often than expected by chance (Goldberg & Wrangham, 1997; John

475 C Mitani et al., 2002). Although these relationships with maternal brothers appear to be  
476 important in infancy, demographic constraints on general availability of maternal brothers as  
477 potential coalition partners is believed to limit chimpanzee affiliation with maternal brothers  
478 (Goldberg & Wrangham, 1997; John C Mitani et al., 2002). On the basis of findings on  
479 affiliation and kinship among chimpanzee brothers we expected to find a weak affiliative  
480 relationships within mother and the adult offspring dyads. Against our expectation we found that  
481 mother offspring dyads maintained close proximity more often than unrelated dyads in co-  
482 feeding context but not other contexts. Although adult chimpanzees and mothers appear not to  
483 affiliate, they nonetheless remain in proximity in competitive contexts. This raises an important  
484 question as to why adult offspring chimpanzees co-feed with mothers if they do not affiliate with  
485 them. Research across chimpanzee populations in Africa shows that both adult male and female  
486 chimpanzees experience high levels of competition for plant food suggesting that these costs  
487 may be reduced by co-feeding with kin (Muller, 2002). Females who are unable to monopolize  
488 feeding site alone may engage in co-feeding with adult sons or daughters, thus enhancing their  
489 feeding success. In humans, unrelated individuals cooperate contingent upon strength of a social  
490 bond (friendship) and potential for reciprocity, whereas kinship has a direct effect on level of  
491 cooperation that is independent of social bond strength or reciprocity - the phenomenon termed  
492 'kinship premium' (Curry, Roberts, & Dunbar, 2013). Kinship is more resilient to decay  
493 overtime, whereas friendships require more investment into social contact to maintain them at a  
494 level of strong social bonding (S. G. Roberts & Dunbar, 2011). The current finding in the  
495 chimpanzees that co-feeding with kin occurs in absence of affiliation, suggests that one might  
496 expect a similar effect of 'kinship premium' in the chimpanzees. The observations that unrelated  
497 sex and reproductive cohort dyads maintain proximity during feeding in presence of affiliation  
498 supports this suggestion.

499 Comparably important to kinship are relationships with partners from the same age  
500 cohort (Altmann, 1979). These relationships develop in infancy through association between

501 mothers (Murray et al., 2014). Mirroring previous findings across Africa, the results show that  
502 these dyads are associated with high rates of affiliation in many different contexts (K.  
503 Langergraber et al., 2009; K. E. Langergraber et al., 2007; J.C. Mitani, Watts, & Muller, 2002). By  
504 expectation, the positive association between co-feeding and kinship should therefore also have  
505 emerged in the same age cohorts. However, these dyads differed in the patterns of co-feeding  
506 from other dyads. Chimpanzees from the same age cohort did not spend more time co-feeding  
507 in proximity than chimpanzees from different age cohort. Although these dyads share important  
508 interactions and behaviours, these relationships appear competitive and costly, possibly due to  
509 the fact that same age partners occupy similar niche and this might create greater competition.  
510 For instance, studies of mountain gorillas showed that when there is a high degree of co-feeding,  
511 individuals deal with competition by using different parts from the same food source (Watts,  
512 1992). In contrast, same age cohort chimpanzees compete for the same food, dominance status,  
513 and position in the network. Same age partners share similar rank, but this equitability may create  
514 social relationships prone to decay because there is no prior consensus about the direction of  
515 potential aggression (F. B. de Waal, 1986; Flack, De Waal, & Waal, 2004). Indeed, partners of the  
516 same age class in rhesus macaques have been found to display high rates of both aggression and  
517 affiliation (Widdig, Nurnberg, Krawczak, Streich, & Bercovitch, 2002). To uncover the extent to  
518 which this lack of co-feeding in same age cohorts is generalizable to other sites it is first  
519 important to examine these relationships in small and large parties of chimpanzees, as these  
520 differ in the degree of feeding competition. In large parties when the feeding competition is  
521 greater, chimpanzees may associate with kin to diffuse competition, but in smaller parties they  
522 may well co-feed with same age partners.

523 Chimpanzees distribute their affiliative and competitive behaviour according to kinship  
524 and demography. However, can gestural communication play a role if influence of these factors  
525 has been discounted? In other words, are chimpanzees more affiliative than would be expected  
526 by chance, if affiliation was dependent on gestural communication alone? Here our findings

527 contribute to prior research by showing that gestural communication exerts important influence  
528 on patterns of social affiliation among chimpanzee dyads. After controlling for kinship and  
529 demography, the data shows that chimpanzees spend longer duration of time affiliating with the  
530 individuals with whom they communicate through gestures. Thus, as there is an increase in the  
531 duration of time A spends in social behaviour with B, there is a corresponding increase or  
532 decrease in the rate of gestural communication emitted by A to B. These findings support earlier  
533 research from vocal modality which showed that sociality is associated with use of vocal  
534 communication (McComb & Semple, 2005). Affiliative gestures such as gestures to initiate  
535 grooming or play appear to have an especially important influence on affiliation. Affiliative  
536 gestural communication positively influenced the duration of time spent in social behaviour,  
537 whereas antagonistic gestural communication negatively influenced duration of time spent in  
538 social behaviour. For instance, the higher rate of gestures to initiate giving grooming predicts  
539 longer grooming, whereas higher rate of gestures to threaten predict shorter grooming. Thus,  
540 affiliative gestures are important in maintaining social relationships and function to coordinate  
541 these interactions. For instance, affiliative gestural communication is more common in socially  
542 complex egalitarian pigtail macaques, than in less socially complex and despotic rhesus macaques  
543 (Maestripieri, 1999).

544         However, affiliation contexts are not uniformly associated with different degrees of  
545 gestural complexity but there is a vast variation in how these measures of complexity are  
546 distributed across contexts. In contexts signifying stronger social bonding (e.g. mutual grooming,  
547 joint travel, mutual visual monitoring) gestures are primarily of low intensity (visual or auditory  
548 short range), ranging from 16 to 17 different forms, that are more complex (e.g. use of facial  
549 expressions, gestures were combined with other gesture types). In contrast, in contexts signifying  
550 weaker social bonding (e.g. unidirectional grooming) (Noë, 2006) gestures are of higher intensity  
551 (tactile, auditory), take 13 different forms that tend to be simpler (e.g. unimodal gesture, non-

552 combined with other gesture types). Gestures given in strong social bonding contexts may  
553 therefore be qualitatively different from gestures given when social bonds are weaker.

554         Why is there such a variation in gesture complexity across contexts? Is this variation  
555 attributed to the efficiency with which communication can influence the recipient? The most  
556 parsimonious explanation of these data is that chimpanzees in the wild are making decisions on  
557 how to communicate, by choosing the gestures that can best influence the recipient in the given  
558 context. Our data supports previous research suggesting that there are two key pathways to  
559 achieving a greater efficiency in gestural communication. Studies in chimpanzees, showed how  
560 intensity of communication can influence efficiency of social bonding in relation to its  
561 effectiveness of conveying signaller's goal specifically (A. I. Roberts & S. G. B. Roberts, 2016).  
562 For instance, visual bodily gestures accompanied by direct gaze and pointing, have a greater  
563 success in coordinating proximity with the recipient than when using visual bodily gestures alone  
564 (Conty et al., 2012; S. Roberts & A. I. Roberts, 2018). Thus by making low intensity, inspecific  
565 gestures more complex, signallers can increase specificity of their gestures and elicit more  
566 accurate response from the recipient. Another way to increase specificity of the gesture is by  
567 increasing their intensity and therefore greater complexity of the gesture is not required (A. I.  
568 Roberts & S. G. B. Roberts, 2016). This link between intensity of communication and specificity  
569 of the response has been shown in studies of nonverbal communication in humans (Zajonc &  
570 Sales, 1966). As the intensity of the signal increases, the mapping between structure of the signal  
571 and the accompanying context becomes tighter enabling recipient to more accurately make the  
572 association between the signal and the signaller's goal. Finally, adding rewarding property to the  
573 signal may increase signal's effectiveness in conducting successful interaction (A. I. Roberts & S.  
574 G. B. Roberts, 2018). These rewarding properties promote greater commitment to the  
575 interaction so that the recipient is more likely to respond to the gesture.

576         The relationships based on behaviours such as mutual grooming or travel appear to be  
577 more mutually appealing as shown by a longer duration of time invested in these behaviours



578 between partners who spend more time in proximity. These relationships are more common  
579 between same age cohort partners – growing up together provides context whereby dyads share  
580 many similarities and are highly familiar with each other. However, a whole range of signals  
581 responsible for maintaining these interactions, for example visual gestures, persistence,  
582 repertoire, facial expression were associated with higher rate of self-scratch, indicating higher  
583 anxiety experienced by the signallers towards recipients of these gestures. One type of answer  
584 that can be given to the question of why chimpanzees experienced higher anxiety in response to  
585 communicating with social partners with whom they displayed a higher rate of affiliative  
586 behaviour is that social relationships with these social partners have been uncertain due to  
587 unresolved dominance relationships. What has long puzzled anthropologists is that dominance  
588 hierarchy can sometimes lead to greater social cohesion because it enables signaller to more  
589 effectively predict outcome of the interaction before they engage in the interaction with the  
590 recipient (Flack, Girvan, De Waal, & Krakauer, 2006). Classical ethologists have shown very  
591 clearly how lack of linear dominance hierarchy can make animal societies less predictable and  
592 more aggressive (Flack, de Waal, & Krakauer, 2005) demanding complex but low intensity  
593 communication to resolve ambiguity in social relationships (A. I. Roberts et al., 2019). This  
594 communication can increase trust of the recipient, as it may appear more positive, therefore  
595 creating a perception of a fitness rewarding intent of the signaler (Roberts & Roberts, 2016a). In  
596 social relationships with dominant chimpanzees, the risks of interaction and direction of  
597 potential aggression is known in advance and therefore dominance relationships increase  
598 certainty by having predictable outcomes (Ay, Flack, & Krakauer, 2007; Flack et al., 2006). In  
599 contrast, equitable ranks are less predictable in that both interactants are equally likely to win if  
600 engaged in a fight resulting in high levels of uncertainty. The mutual appeal that draws  
601 chimpanzees together in these social interactions, has been insufficient and the power of gestural  
602 communication has been exploited to facilitate social interactions between these partners. Low  
603 intensity signals designed to effectively convey the intentions of a signaller in a way that leads to

604 a reduction in uncertainty of the recipient about the signaller's goal encompass all common  
605 signals seen in these contexts.

606 In contrast, the relationships based on behaviours such as unidirectional grooming are  
607 often directed towards chimpanzees who display higher rank. Gestures made in unidirectional  
608 grooming context were associated with reduced rate of self-scratching by the recipient,  
609 suggesting that recipients experience reduced anxiety when receiving these gestures. This reveals  
610 a possible lack of mutual appeal in these interactions as the signaller actively influences  
611 recipient's positive affect to enhance its willingness to associate. As the anxiety is reduced, the  
612 signaller increases recipient's commitment to the social interaction forging stronger social  
613 bonding. Thus, in these contexts, in addition to conveying goals effectively through more intense  
614 gestures, use of signals that increase rewards are important to succeed in engaging the recipient  
615 who may otherwise not be particularly interested in the interaction.

616 The differentiated communication strategies of the chimpanzees may have evolved in  
617 response to the demands imposed by competition in complex social settings. Both male and  
618 female chimpanzees often compete for food and individual's ability to gain access to food can  
619 influence their reproductive success (Muller, 2002). Evidence from chimpanzees indicates that  
620 social variables such as party size can affect individual's relative competitive success in feeding  
621 contexts. Chimpanzees in larger parties derive benefits from lower predation pressure but may  
622 face a higher feeding competition than the chimpanzees in smaller parties. Competition for food  
623 may therefore promote evolution of the strategies the individuals use to diffuse this competition.  
624 Influential strategy includes grooming to reduce likelihood of potential aggression during co-  
625 feeding. In small social groups, chimpanzees face lower social competition and thus can invest in  
626 grooming with the social partners that are insecure but appealing. However, when the size of the  
627 group increases, the safety of secure relationships promotes feeding efficiency and therefore  
628 grooming interactions focus on these social partners. Tactile gestures that have a rewarding  
629 property can compete for recipient's attention in larger groups more effectively than visual

630 gestures by being more capable of redirecting recipient's attention from the wider audience onto  
631 the signaller. Furthermore, rewarding gestures may have a better coordination value by being  
632 able to influence recipient's behaviour more directly through more intense and specific gestures  
633 (A. I. Roberts & S. G. B. Roberts, 2016). Studies showed that when larger audience is present,  
634 both rewarding and coordination properties of gestural communication facilitate longer  
635 grooming and this in turn is associated with longer co-feeding in proximity (A. I. Roberts, 2018).  
636 Given the time budgeting constraints on grooming (Dunbar, 1992), there may be a limit for use  
637 of grooming as a tool for diffusing social competition in feeding contexts. Our data reveals that  
638 chimpanzees incorporated use of objects and vocalisations when gesturing towards conspecifics  
639 with whom they spent short periods of time in proximity. Similarly, use of objects such as a  
640 trunk of a tree to make sounds accompanied by use of rhythmic vocalisations ('synchronized  
641 high-intensity pant hoot') may potentially fulfil such a function as this communication is used  
642 most often when joining feeding sites or during travel (Clark & Wrangham, 1994; S. G. B.  
643 Roberts & A. I. Roberts, 2016). Supporting these suggestions, our evidence shows that  
644 synchronized high-intensity pant hoots were associated with reduced displacement behaviours in  
645 the recipient. When social parties become large, the ability to groom with conspecifics may  
646 decline and 'synchronized high-intensity pant hoot' may facilitate social cohesion by reducing  
647 anxiety of the recipients (S. G. B. Roberts & A. I. Roberts, 2016). This property may draw  
648 attention of the recipients from the wider audience onto the signaller facilitating longer  
649 interactions such as travel or co-feeding. This finding supports research on humans (Jackson et  
650 al., 2018) showing that joint, high intensity behaviours have a role in social cohesion by being  
651 intensely rewarding to the dyad partners, regardless of the history of prior interaction.

652         The complexity of a social system depends on the complexity of individual relationships  
653 between animals, as the individual-level social interactions scale to the emergent properties found  
654 in the social system (Krause, Croft, & James, 2007). In this study we highlight the tactical  
655 decisions that wild chimpanzees make in their use of gestural communication to develop and

656 maintain complexity of their social system. The selective pressures arising from maintaining this  
657 social complexity is proposed to have played a key role both in the evolution of communicative  
658 complexity and in the evolution of larger brains both in primates and in hominins. However,  
659 detailed behavioural evidence of an association between communicative complexity and these  
660 differentiated social relationships is lacking. Here we address this issue by examining how  
661 different types of social behaviour relate to patterns of gestural communication. Overall, our  
662 results suggest that differentiated patterns of gestural communication can help chimpanzees  
663 maintain a network of differentiated social relationships, and that this may allow individual  
664 primates to successfully navigate a complex social world. Future studies exploring the  
665 relationship between the complexity of communication skills, sociality and brain size across a  
666 range of primate species would allow for a deeper understanding of the association between  
667 complex social systems and complex communication.

#### 668 **Acknowledgement**

669 The data collection was funded by the Economic and Social Research Council 3+ fellowship and  
670 the University of Stirling. We thank the Royal Zoological Society of Scotland for providing core  
671 funding to the Budongo Conservation Field Station, Uganda, as well as the Ugandan Wildlife  
672 Authority and the Uganda National Council for Science and Technology for permission to carry  
673 out this research. We are most grateful to Prof. Klaus Zuberbuhler and Geresomu Muhumuza  
674 for fantastic fieldwork.

#### 675 **References**

- 676 Altmann, J. (1979). Age cohorts as paternal sibships. *Behavioral Ecology and Sociobiology*, 6(2), 161-  
677 164.
- 678 Aureli, F. (1997). Post-conflict anxiety in nonhuman primates: the mediating role of emotion in  
679 conflict resolution. *Aggressive Behavior: Official Journal of the International Society for Research on*  
680 *Aggression*, 23(5), 315-328.
- 681 Aureli, F., & Schaik, C. P. v. (1991). Post-conflict behaviour in long-tailed macaques (*Macaca*  
682 *fascicularis*) II. Coping with the uncertainty. *Ethology*, 89(2), 101-114.
- 683 Ay, N., Flack, J., & Krakauer, D. C. (2007). Robustness and complexity co-constructed in  
684 multimodal signalling networks. *Philosophical Transactions of the Royal Society B: Biological*  
685 *Sciences*, 362(1479), 441-447.

- 686 Baker, K. C., & Aureli, F. (1997). Behavioural indicators of anxiety: an empirical test in  
687 chimpanzees. *Behaviour*, 134(13), 1031-1050.
- 688 Boesch, C. (1996). Social grouping in Tai chimpanzees. In W. C. McGrew, L. Marchant, & T.  
689 Nishida (Eds.), *Great Ape Societies* (pp. 101-113). Cambridge: Cambridge University Press.
- 690 Borgatti, S. P., Everett, M. G., & Johnson, J. C. (2013). *Analyzing Social Networks*: SAGE  
691 Publications Limited.
- 692 Castles, D. L., & Whiten, A. (1998). Post-conflict behaviour of wild olive baboons. II. Stress and  
693 self-directed behaviour. *Ethology*, 104(2), 148-160.
- 694 Clark, A. P., & Wrangham, R. W. (1994). Chimpanzee arrival pant-hoots: Do they signify food or  
695 status? *International Journal of Primatology*, 15(2), 185-205.
- 696 Conty, L., Dezecache, G., Hugueville, L., & Grèzes, J. (2012). Early binding of gaze, gesture, and  
697 emotion: neural time course and correlates. *The Journal of Neuroscience*, 32(13), 4531-4539.
- 698 Croft, D. P., James, R., & Krause, J. (2010). *Exploring Animal Social Networks*. Princeton, New  
699 Jersey: Princeton University Press.
- 700 Curry, O., Roberts, S. G., & Dunbar, R. I. (2013). Altruism in social networks: Evidence for a  
701 'kinship premium'. *British Journal of Psychology*, 104(2), 283-295.
- 702 Dawkins, M. S., & Guilford, T. (1997). Conspicuousness and diversity in animal signals.  
703 *Communication*, 55-75.
- 704 de Waal, F. B. (1986). The integration of dominance and social bonding in primates. *Quarterly  
705 Review of Biology*, 61(4), 459-479.
- 706 De Waal, F. B. M. (1982). *Chimpanzee politics: Power and sex among apes*. New York: Harper & Row.
- 707 Dekker, D., Krackhardt, D., & Snijders, T. A. (2007). Sensitivity of MRQAP tests to collinearity  
708 and autocorrelation conditions. *Psychometrika*, 72(4), 563-581.
- 709 Diezinger, F. t., & Anderson, J. (1986). Starting from scratch: A first look at a "displacement  
710 activity" in group-living rhesus monkeys. *American journal of primatology*, 11(2), 117-124.
- 711 Dunbar, R. I. M. (1992). Neocortex size as a constraint on group size in primates. *Journal of  
712 Human Evolution*, 20, 469-493.
- 713 Feldman, R., Gordon, I., & Zagoory-Sharon, O. (2011). Maternal and paternal plasma, salivary,  
714 and urinary oxytocin and parent–infant synchrony: considering stress and affiliation  
715 components of human bonding. *Developmental science*, 14(4), 752-761.
- 716 Field, A. (2013). *Discovering statistics using IBM SPSS statistics*: sage.
- 717 Flack, J. C., de Waal, F. B., & Krakauer, D. C. (2005). Social structure, robustness, and policing  
718 cost in a cognitively sophisticated species. *The American Naturalist*, 165(5), E126-E139.
- 719 Flack, J. C., De Waal, F. B., & Waal, D. (2004). Dominance style, social power, and conflict  
720 management: a conceptual framework. In: *Macaque Societies: A Model for the Study of  
721 Social Organization* (Ed. by.
- 722 Flack, J. C., Girvan, M., De Waal, F. B., & Krakauer, D. C. (2006). Policing stabilizes  
723 construction of social niches in primates. *Nature*, 439(7075), 426-429.
- 724 Foerster, S., McLellan, K., Schroepfer-Walker, K., Murray, C. M., Krupenye, C., Gilby, I. C., &  
725 Pusey, A. E. (2015). Social bonds in the dispersing sex: partner preferences among adult  
726 female chimpanzees. *Animal Behaviour*, 105, 139-152.
- 727 Gerhardt, H. C., & Doherty, J. A. (1988). Acoustic communication in the gray treefrog, *Hyla  
728 versicolor*: evolutionary and neurobiological implications. *Journal of Comparative Physiology  
729 A*, 162(2), 261-278.
- 730 Goldberg, T. L., & Wrangham, R. W. (1997). Genetic correlates of social behaviour in wild  
731 chimpanzees: evidence from mitochondrial DNA. *Animal Behaviour*, 54(3), 559-570.
- 732 Goodall, J. (1986). *The Chimpanzees of Gombe: Patterns of Behaviour*. Cambridge, Massachusetts:  
733 Harvard University Press.
- 734 Hamilton, W. D. (1964). The genetical evolution of social behaviour. II. *Journal of theoretical biology*,  
735 7(1), 17-52.

- 736 Hewes, G. W. (1973). Primate communication and the gestural origin of language. *Current*  
737 *Anthropology*, 14, 5-24.
- 738 Hinde, R. A. (1976). Interactions, relationships and social structure. *Man*, 1-17.
- 739 Jackson, J. C., Jong, J., Bilkey, D., Whitehouse, H., Zollmann, S., McNaughton, C., &  
740 Halberstadt, J. (2018). Synchrony and Physiological Arousal Increase Cohesion and  
741 Cooperation in Large Naturalistic Groups. *Scientific reports*, 8(1), 127. doi:10.1038/s41598-  
742 017-18023-4
- 743 Kerth, G., Perony, N., & Schweitzer, F. (2011). Bats are able to maintain long-term social  
744 relationships despite the high fission–fusion dynamics of their groups. *Proceedings of the*  
745 *Royal Society of London B: Biological Sciences*, 278(1719), 2761-2767.
- 746 Krause, J., Croft, D., & James, R. (2007). Social network theory in the behavioural sciences:  
747 Potential applications. *Behavioral Ecology and Sociobiology*, 62(1), 15-27.
- 748 Langergraber, K., Mitani, J., & Vigilant, L. (2009). Kinship and social bonds in female  
749 chimpanzees (*Pan troglodytes*). *American journal of primatology*, 71(10), 840-851.
- 750 Langergraber, K. E., Mitani, J. C., & Vigilant, L. (2007). The limited impact of kinship on  
751 cooperation in wild chimpanzees. *Proceedings of the National Academy of Sciences*, 104(19),  
752 7786-7790.
- 753 Liebal, K., Call, J., & Tomasello, M. (2004). Use of gesture sequences in chimpanzees. *American*  
754 *journal of primatology*, 64(4), 377-396.
- 755 Maestriper, D. (1999). Primate social organization, gestural repertoire size, and communication  
756 dynamics: a comparative study of macaques. In B. J. King (Ed.), *The origins of language:*  
757 *what nonhuman primates can tell us* (pp. 55 - 77). Santa Fe: School of American Research  
758 Press.
- 759 Maestriper, D. (2005). Gestural communication in three species of macaques (*Macaca mulatta*,  
760 *M. nemestrina*, *M. arctoides*): Use of signals in relation to dominance and social context.  
761 *Gesture*, 5(1), 55-71.
- 762 Massen, J. J., & Koski, S. E. (2014). Chimps of a feather sit together: chimpanzee friendships are  
763 based on homophily in personality. *Evolution and Human Behavior*, 35(1), 1-8.
- 764 McComb, K., & Semple, S. (2005). Coevolution of vocal communication and sociality in  
765 primates. *Biology Letters*, 1(4), 381-385.
- 766 Mitani, J. C., Watts, D. P., & Muller, M. N. (2002). Recent developments in the study of wild  
767 chimpanzee behavior. *Evolutionary Anthropology*, 11(1), 9-25.
- 768 Mitani, J. C., Watts, D. P., Pepper, J. W., & Merriwether, D. A. (2002). Demographic and social  
769 constraints on male chimpanzee behaviour. *Animal Behaviour*, 64(5), 727-737.
- 770 Möller, L. M., Beheregaray, L. B., Harcourt, R. G., & Krützen, M. (2001). Alliance membership  
771 and kinship in wild male bottlenose dolphins (*Tursiops aduncus*) of southeastern  
772 Australia. *Proceedings of the Royal Society of London B: Biological Sciences*, 268(1479), 1941-1947.
- 773 Muller, M. N. (2002). Agonistic relations among Kanyawara chimpanzees. *Behavioural diversity in*  
774 *chimpanzees and bonobos*, 112-124.
- 775 Murray, C. M., Lonsdorf, E. V., Stanton, M. A., Wellens, K. R., Miller, J. A., Goodall, J., &  
776 Pusey, A. E. (2014). Early social exposure in wild chimpanzees: Mothers with sons are  
777 more gregarious than mothers with daughters. *Proceedings of the National Academy of Sciences*,  
778 111(51), 18189-18194.
- 779 Nakayama, K., Goto, S., Kuraoka, K., & Nakamura, K. (2005). Decrease in nasal temperature of  
780 rhesus monkeys (*Macaca mulatta*) in negative emotional state. *Physiology & behavior*, 84(5),  
781 783-790.
- 782 Nishida, T., Zamma, K., Matsusaka, T., Inaba, A., & McGrew, W. C. (2010). *Chimpanzee behavior*  
783 *in the wild: An audio-visual encyclopedia*. Tokyo: Springer.
- 784 Noë, R. (2006). Cooperation experiments: coordination through communication versus acting  
785 apart together. *Animal Behaviour*, 71(1), 1-18.

- 786 Ortega-Ortiz, J. G., Engelhaupt, D., Winsor, M., Mate, B. R., & Rus Hoelzel, A. (2012). Kinship  
787 of long-term associates in the highly social sperm whale. *Molecular Ecology*, 21(3), 732-744.
- 788 PAYNE, R. J., & PAGEL, M. (1997). Why do animals repeat displays? *Animal Behaviour*, 54(1),  
789 109-119.
- 790 Pearce, E., Wlodarski, R., Machin, A., & Dunbar, R. I. (2017). Variation in the  $\beta$ -endorphin,  
791 oxytocin, and dopamine receptor genes is associated with different dimensions of human  
792 sociality. *Proceedings of the National Academy of Sciences USA*, 201700712.
- 793 Roberts, A. I. (2018). Influence of party size on social bonding and gestural persistence in wild  
794 chimpanzees. *Advances in Biology and Earth Sciences*, 3(3), 205 -228.
- 795 Roberts, A. I., Chakrabarti, A., & Roberts, S. G. B. (2019). Gestural repertoire size is associated  
796 with social proximity measures in wild chimpanzees. *American journal of primatology*, e22954.  
797 doi:10.1002/ajp.22954
- 798 Roberts, A. I., & Roberts, S. G. B. (2015). Gestural communication and mating tactics in wild  
799 chimpanzees. *PloS One*, 10(11), e0139683. doi:10.1371/journal.pone.0139683
- 800 Roberts, A. I., & Roberts, S. G. B. (2016). Wild chimpanzees modify modality of gestures  
801 according to the strength of social bonds and personal network size. *Scientific reports*,  
802 6(33864). doi:10.1038/srep33864
- 803 Roberts, A. I., & Roberts, S. G. B. (2017). Convergence and divergence in gestural repertoires as  
804 an adaptive mechanism for social bonding in primates. *Royal Society Open Science*, 4:  
805 170181. doi:https://doi.org/10.1098/rsos.170181
- 806 Roberts, A. I., & Roberts, S. G. B. (2018). Persistence in gestural communication predicts  
807 sociality in wild chimpanzee. *Animal Cognition*. doi:10.1101/365858
- 808 Roberts, A. I., Roberts, S. G. B., & Vick, S.-J. (2014). The repertoire and intentionality of gestural  
809 communication in wild chimpanzees. *Animal Cognition*, 17(2), 317 - 336.  
810 doi:10.1007/s10071-013-0664-5
- 811 Roberts, A. I., Vick, S.-J., & Buchanan-Smith, H. (2012). Usage and comprehension of manual  
812 gestures in wild chimpanzees. *Animal Behaviour*, 84(2), 459-470.  
813 doi:10.1016/j.anbehav.2012.05.022
- 814 Roberts, A. I., Vick, S.-J., & Buchanan-Smith, H. (2013). Communicative intentions in wild  
815 chimpanzees: Persistence and elaboration in gestural signalling. *Animal Cognition*, 16(2),  
816 187-196. doi:10.1007/s10071-012-0563-1
- 817 Roberts, A. I., Vick, S.-J., Roberts, S. G. B., Buchanan-Smith, H. M., & Zuberbühler, K. (2012).  
818 A structure-based repertoire of manual gestures in wild chimpanzees: Statistical analyses  
819 of a graded communication system. *Evolution and Human Behavior*, 33(5), 578-589.  
820 doi:10.1016/j.evolhumbehav.2012.05.006
- 821 Roberts, A. I., Vick, S.-J., Roberts, S. G. B., & Menzel, C. R. (2014). Chimpanzees modify  
822 intentional gestures to coordinate a search for hidden food. *Nature Communications* 5,  
823 3088. doi:10.1038.ncomms4088
- 824 Roberts, S., & Roberts, A. I. (2018). Visual attention, indicative gestures, and calls accompanying  
825 gestural communication are associated with sociality in wild chimpanzees (*Pan*  
826 *troglodytes schweinfurthii*). *Journal of Comparative Psychology*. doi:10.1037/com0000128
- 827 Roberts, S. G., & Dunbar, R. I. (2011). The costs of family and friends: an 18-month longitudinal  
828 study of relationship maintenance and decay. *Evolution and Human Behavior*, 32(3), 186-  
829 197.
- 830 Roberts, S. G. B., & Roberts, A. I. (2016). Social brain hypothesis, vocal and gesture networks of  
831 wild chimpanzees. *Frontiers in psychology*, 7(1756). doi:10.3389/fpsyg.2016.01756
- 832 Schino, G., Perretta, G., Taglioni, A. M., Monaco, V., & Troisi, A. (1996). Primate displacement  
833 activities as an ethopharmacological model of anxiety. *Anxiety*, 2(4), 186-191.
- 834 Schino, G., Scucchi, S., Maestriperieri, D., & Turillazzi, P. G. (1988). Allogrooming as a tension  
835 reduction mechanism: A behavioral approach. *American journal of primatology*, 16(1), 43-50.

836 Silk, J. B., Seyfarth, R. M., & Cheney, D. L. (2018). Quality versus quantity: do weak bonds  
 837 enhance the fitness of female baboons? *Animal Behaviour*, *140*, 207-211.

838 Silk, M. J., Jackson, A. L., Croft, D. P., Colhoun, K., & Bearhop, S. (2015). The consequences of  
 839 unidentifiable individuals for the analysis of an animal social network. *Animal Behaviour*,  
 840 *104*, 1-11.

841 Van Schaik, C. P., & Van Hooff, J. A. (1994). Male bonds: affiliative relationships among  
 842 nonhuman primate males. *Behaviour*, *130*(3-4), 309-337.

843 Watts, D. P. (1992). Social relationships of immigrant and resident female mountain gorillas. I.  
 844 Male-female relationships. *American journal of primatology*, *28*(3), 159-181.

845 Widdig, A., Nurnberg, P., Krawczak, M., Streich, W. J., & Bercovitch, F. (2002). Affiliation and  
 846 aggression among adult female rhesus macaques: a genetic analysis of paternal cohorts.  
 847 *Behaviour*, *139*(2-3), 371-392.

848 Wrangham, R. W. (1980). An ecological model of female-bonded primate groups. *Behaviour*,  
 849 *75*(3), 262-300.

850 Zahavi, A., & Zahavi, A. (1997). *The handicap principle: a missing piece of Darwin's puzzle*. Oxford  
 851 University Press.

852 Zajonc, R. B., & Sales, S. M. (1966). Social facilitation of dominant and subordinate responses.  
 853 *Journal of Experimental Social Psychology*, *2*(2), 160-168.

854

855 Table 1: Focal ID, sex, year of birth, kinship and reproductive status of the 12 focal subjects  
 856 included in the study.

857

| <b>Focal subject ID</b> | <b>Sex</b> | <b>Age</b> | <b>Female reproductive status</b> | <b>Kinship</b> | <b>Total observation duration (minutes)</b> |
|-------------------------|------------|------------|-----------------------------------|----------------|---------------------------------------------|
| KU                      | Female     | 29         | Pregnant                          | KT (son)       | 910                                         |
| KW                      | Female     | 27         | Nursing                           |                | 510                                         |
| ML                      | Female     | 33         | Cycling                           |                | 1118                                        |
| NB <sup>b</sup>         | Female     | 46         | Cycling                           | MS (son)       | 500                                         |
| RH                      | Female     | 43         | Nursing                           | NK (son)       | 1038                                        |
| ZM                      | Female     | 40         | Cycling                           |                | 710                                         |
| BB                      | Male       | 21         | -                                 |                | 516                                         |
| HW                      | Male       | 15         | -                                 |                | 1030                                        |
| KT                      | Male       | 15         | -                                 | KU (mother)    | 1026                                        |



|                 |      |    |   |             |     |
|-----------------|------|----|---|-------------|-----|
| MS              | Male | 17 | - | NB (mother) | 524 |
| NK <sup>a</sup> | Male | 26 | - | RH (mother) | 582 |
| SQ              | Male | 17 | - |             | 554 |

858 Notes. <sup>a</sup> Alpha male <sup>b</sup> Alpha female.

859 Table 2. Definitions, means and standard deviations (SD) for social behaviours, based on 132  
 860 chimpanzee dyads. All social behaviours measured as durations (mins), per hour dyad spent  
 861 within 10 m. For joint behaviours (e.g. feeding, resting, travelling) both dyad partners were  
 862 engaged in the same behaviour. The behaviors are described in depth in (Nishida et al., 2010).

| Behaviour <sup>1</sup> | Definition                                                                                                               | Mean±SD   |
|------------------------|--------------------------------------------------------------------------------------------------------------------------|-----------|
| Joint feeding          | Focal and non-focal subject consume food simultaneously                                                                  | 1.25±2.53 |
| Joint resting          | Focal and non-focal subject are in resting position not involved in any activity                                         | 1.56±5.73 |
| Joint travel           | Focal and non-focal subjects simultaneously relocate from one location in the habitat to another                         | 0.44±1.58 |
| Grooming given         | Focal subject grooms non-focal subject by picking dirt and parasite from their hair.                                     | 0.69±2.33 |
| Grooming received      | Focal subject receives grooming from non-focal subject who is picking dirt and parasites from their hair.                | 0.67±2.55 |
| Grooming mutual        | Both focal and non-focal subject simultaneously pick dirt and parasites from hair of one another.                        | 0.53±2.13 |
| Attention present      | Both focal and non-focal subjects are bodily oriented towards one another (one has another within field of view up to 45 | 3.04±5.68 |

|                  |                                                                                                                                                                                          |            |
|------------------|------------------------------------------------------------------------------------------------------------------------------------------------------------------------------------------|------------|
|                  | degrees body turn)                                                                                                                                                                       |            |
| Attention absent | Both focal and non-focal subjects are bodily oriented away from one another (one has another away from field of view up to 45 degrees body turn)                                         | 1.84±5.68  |
| Proximity        | Focal and non-focal subjects are within 2 meters of one another                                                                                                                          | 6.16±10.05 |
| Scratch produced | Focal subject rakes with the fingers through their own hair repeatedly or singly – all chimpanzee scratch (social and non-social) was included                                           | 0.64±1.68  |
| Scratch received | Focal subject is recipient of the scratch whereby the non-focal subject rakes their own hair with the fingers through the hair repeatedly or singly (all types of scratch were included) | 0.64±1.68  |

863 <sup>1</sup> see Roberts and Roberts (2017) for contribution of each dyad to the dataset

864 Table 3. Attributes used to classify dyads

| <b>Attribute of dyad</b>      | <b>Description</b>                                                                                                                                                                                                                                          |
|-------------------------------|-------------------------------------------------------------------------------------------------------------------------------------------------------------------------------------------------------------------------------------------------------------|
| Sex difference                | Sex difference between focal subject and the recipient (0 = opposite sex, 1 = same sex)                                                                                                                                                                     |
| Age difference                | Age difference between focal subject and the recipient: 0 = different age (more than 5 years age difference with the dyad partner), 1 = same age (up to 5 years age difference)                                                                             |
| Reproductive state difference | Reproductive state difference between focal subject and the recipient (0 = different reproductive state: unoestrous female-<br>oestrous female, unoestrous female-male dyad; 1 = same reproductive state: male-male, male-oestrous female, oestrous female) |

|                  |                                                                                                                                    |
|------------------|------------------------------------------------------------------------------------------------------------------------------------|
|                  | – male, unoestrous female – unoestrous female, oestrous female-oestrous female dyad, etc.)                                         |
| Maternal kinship | Maternal kinship (mother-offspring or offspring-mother) presence between focal subject and the recipient (0 = absent, 1 = present) |

865

866 Figure 1. Social networks: a) attention absent, b) attention present, c) proximity, d) joint feeding,  
 867 e) grooming given, f) grooming mutual, g) grooming received, h) joint resting, i) joint travel, j)  
 868 scratch produced, k) scratch received

869 a)

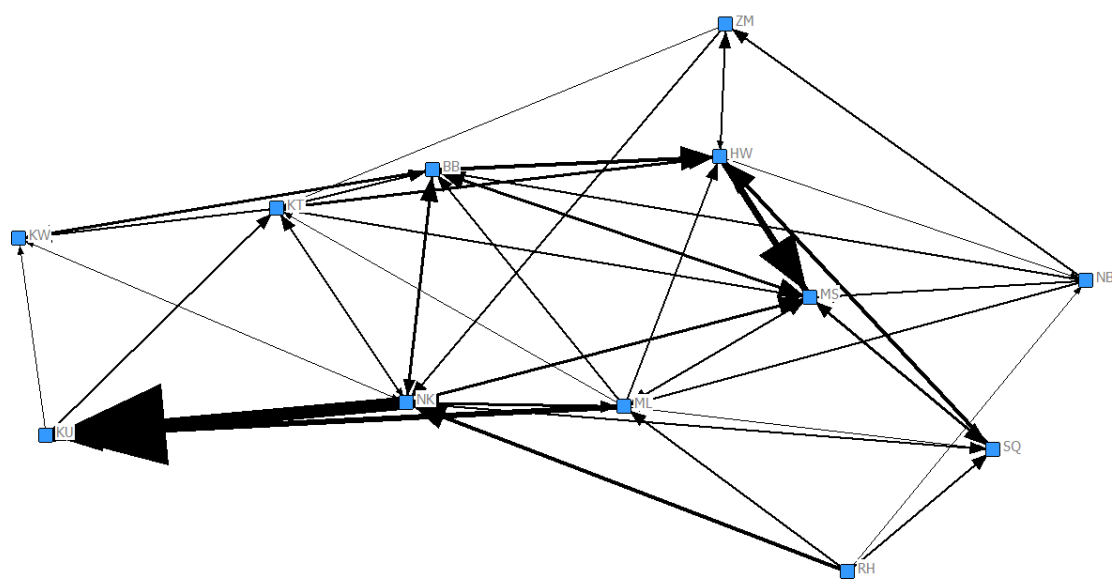

870

871 b)



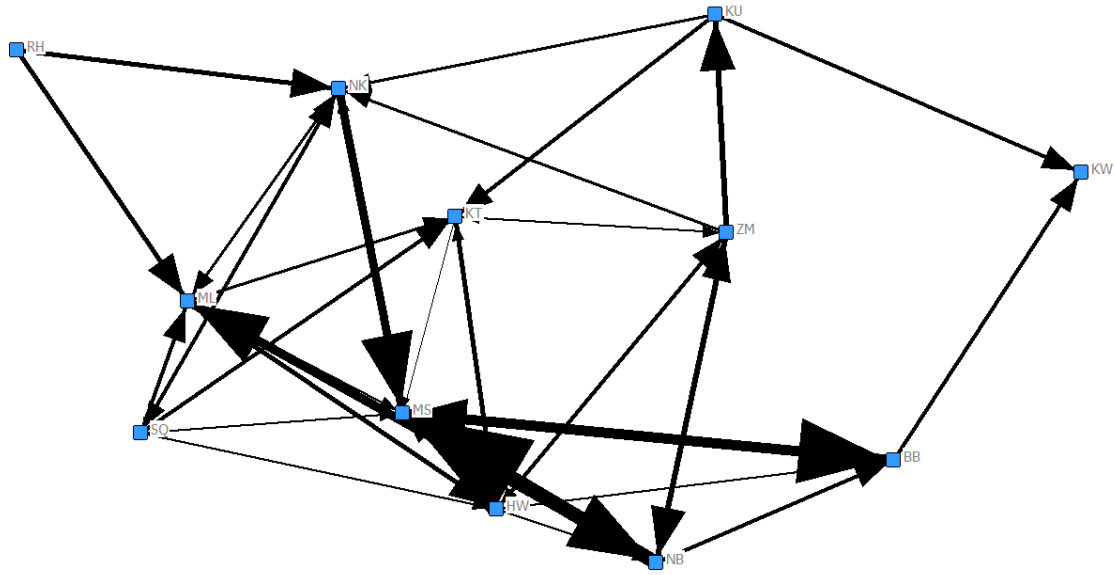

876

877 e)

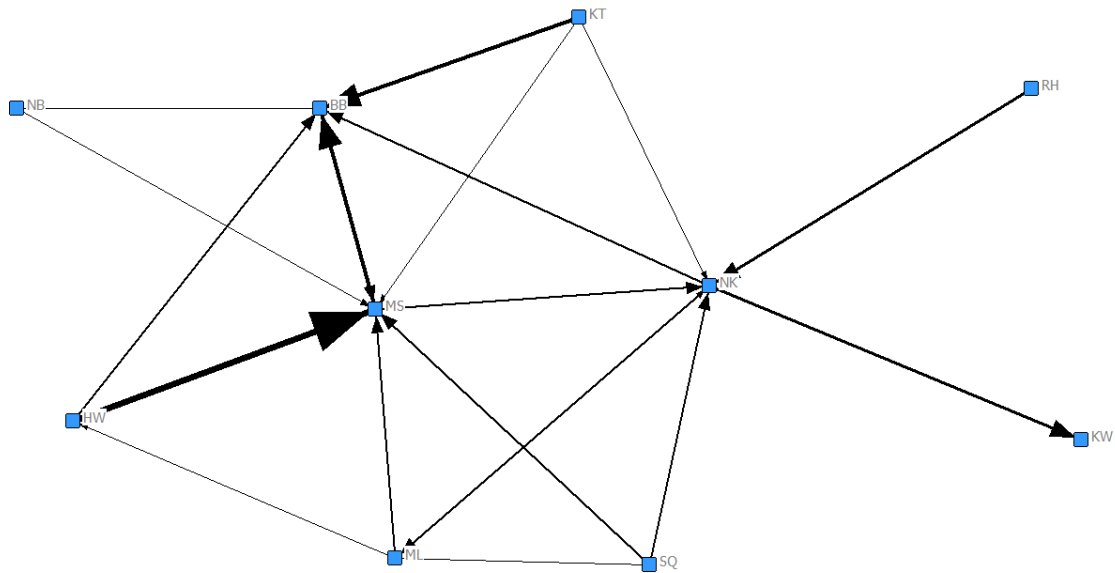

878

879 f)

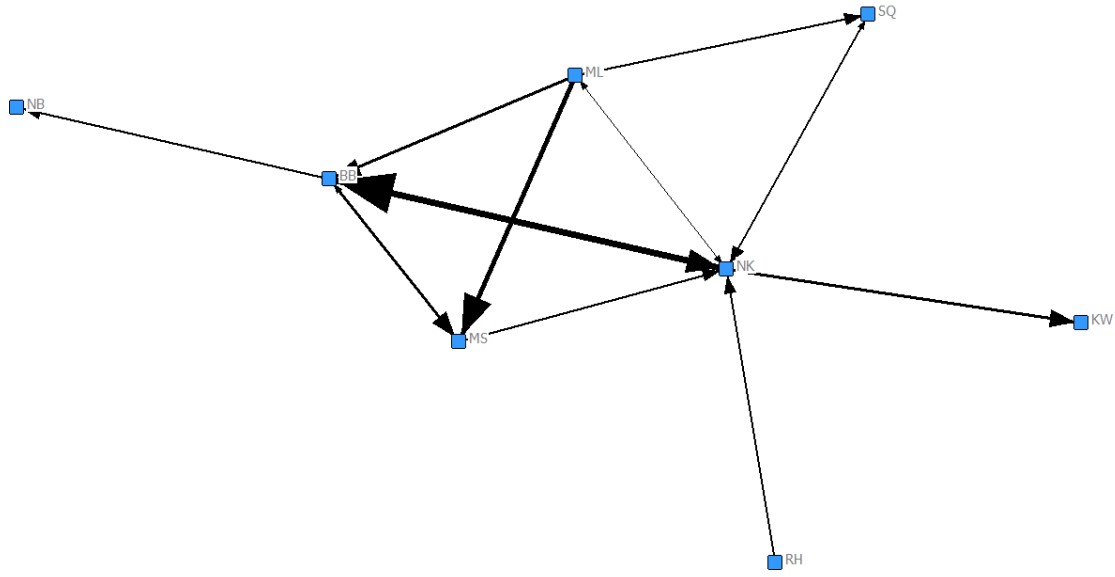

880

881 g)

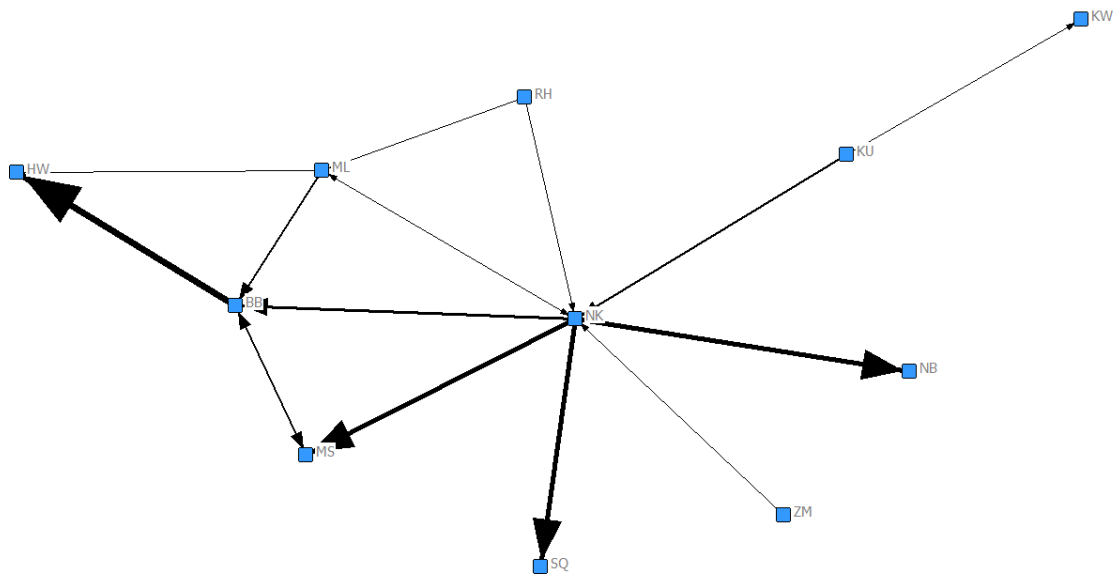

882

883

884 h)

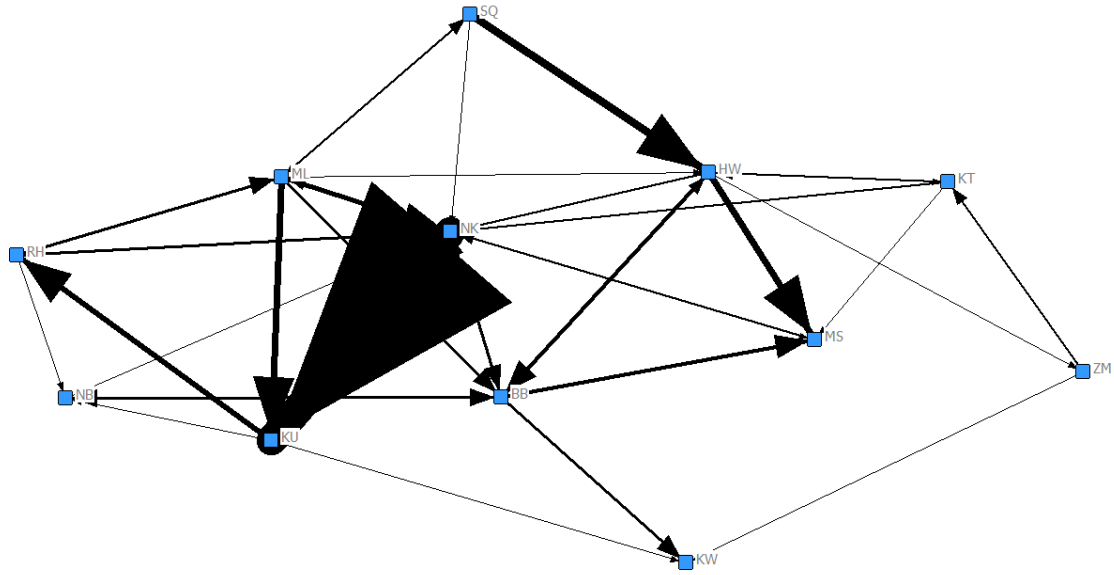

885

886 i)

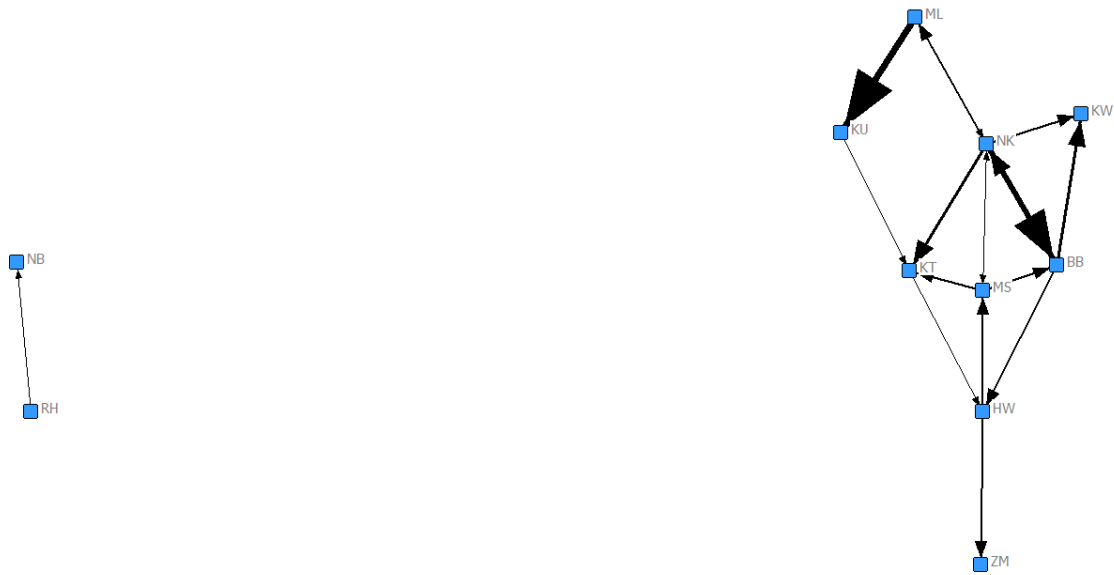

887

888 j)

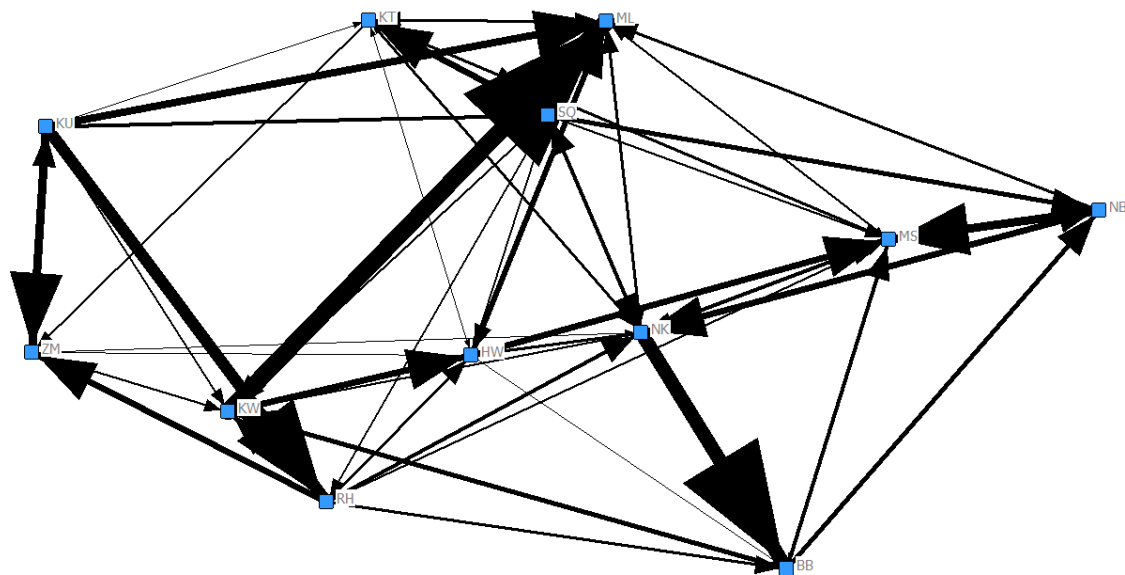

889

890 k)

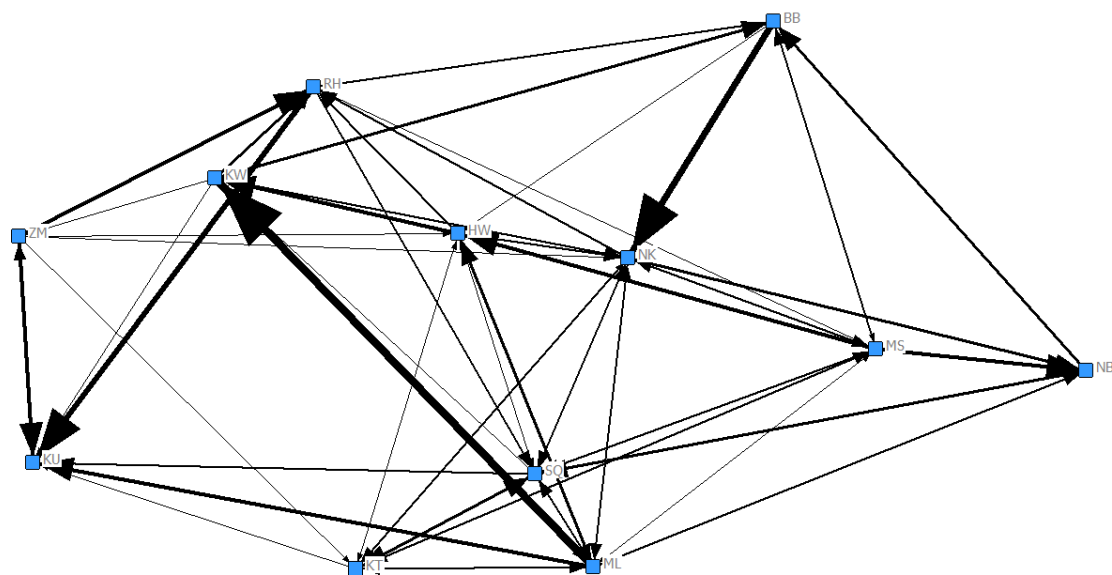

891

892 Figure 2. Social networks of gestures categorised according to Modality: a) auditory long range,  
893 b) auditory short range, c) tactile, d) visual; e) Repertoire size; Object use: f) objects, g) no  
894 objects; Combined gestures: h) combined, i) single (non-combined); Indicative: j) manual  
895 indicative, k) manual non-indicative; Bodily and manual: l) bodily, m) manual; Attention: n)



896 mutual attention present, o) mutual attention absent; Multimodal: p) multimodal (facial  
897 expression), q) multimodal (vocal), r) unimodal; Homogeneity: s) homogenous, t) heterogeneous

898 a)

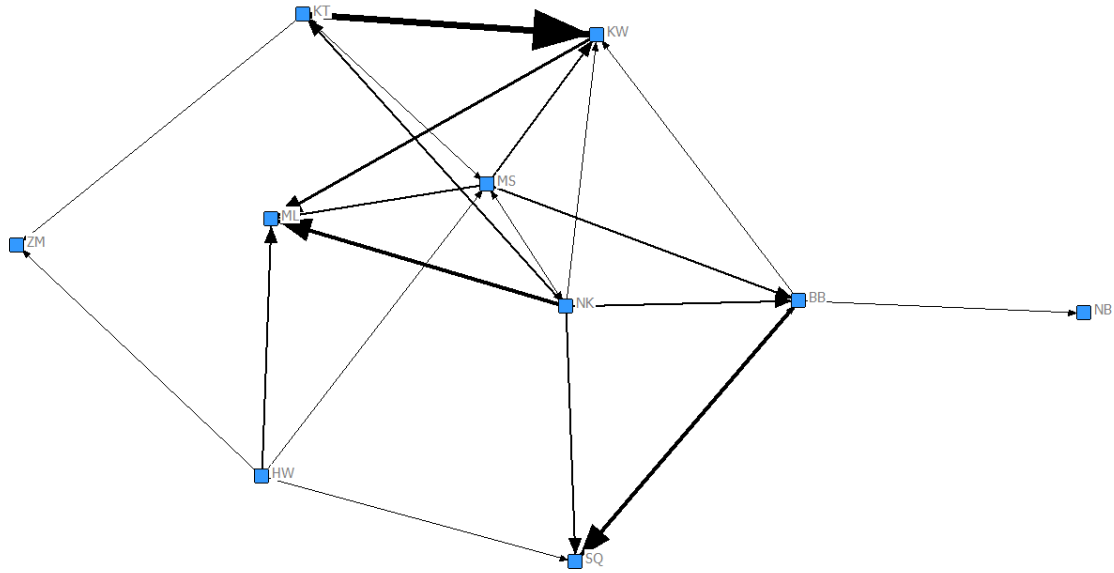

899

900

901 b)

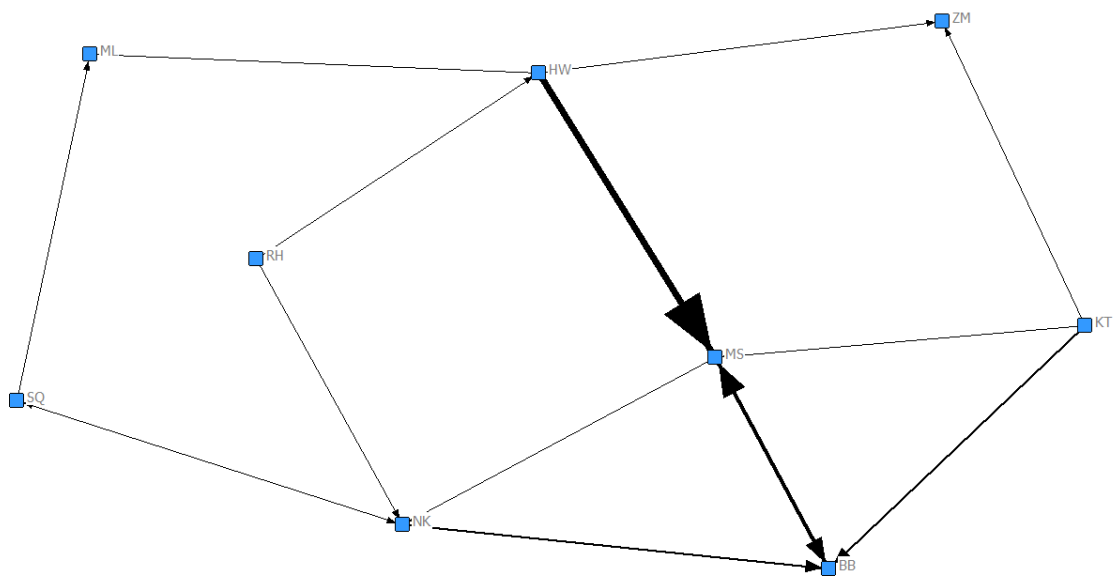

902

903 c)

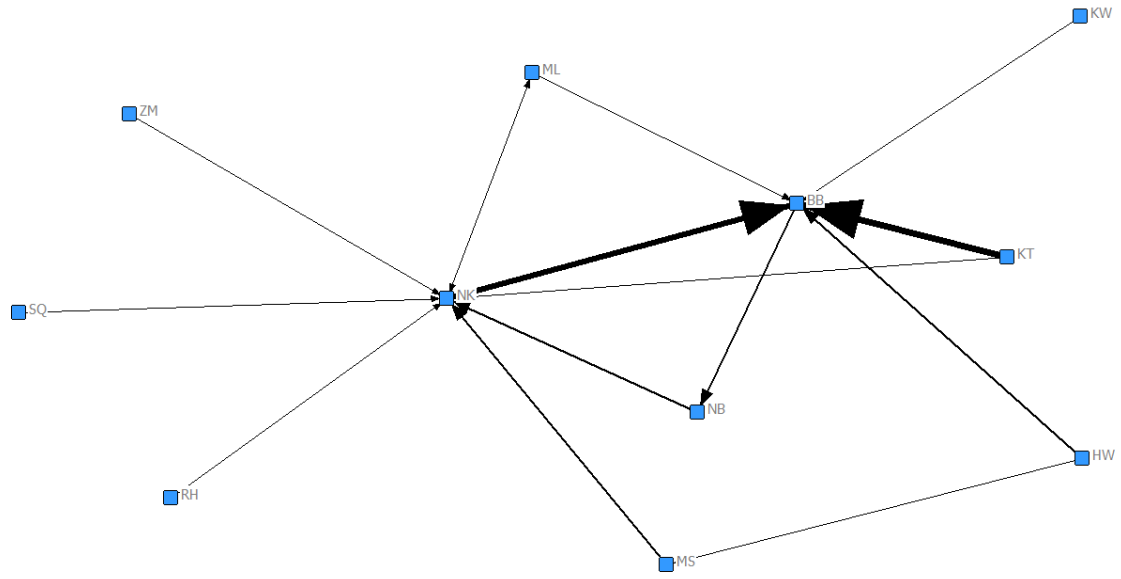

904

905 d)

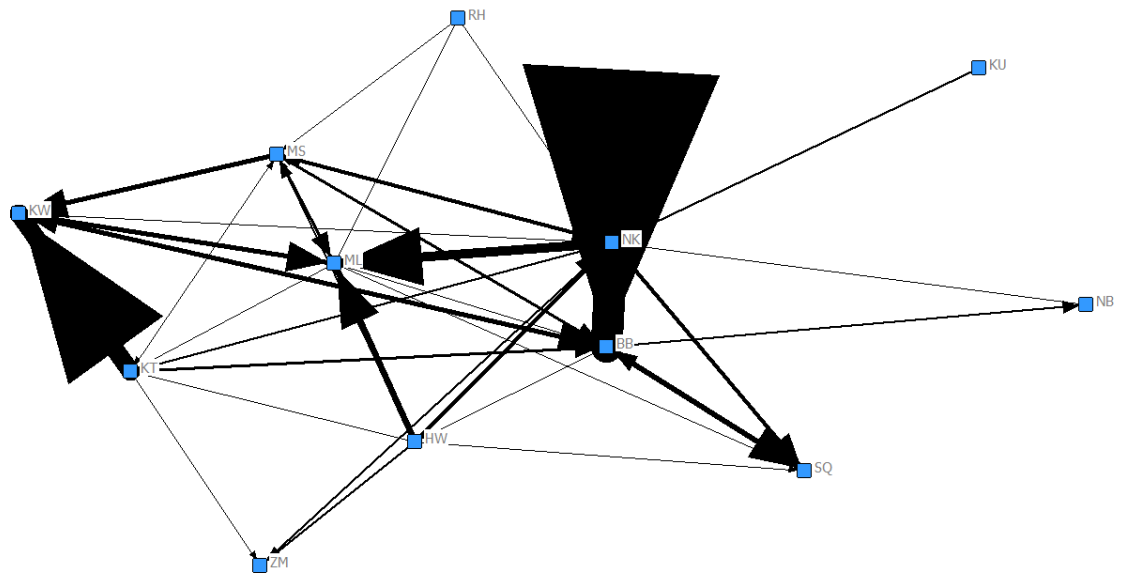

906

907 e)

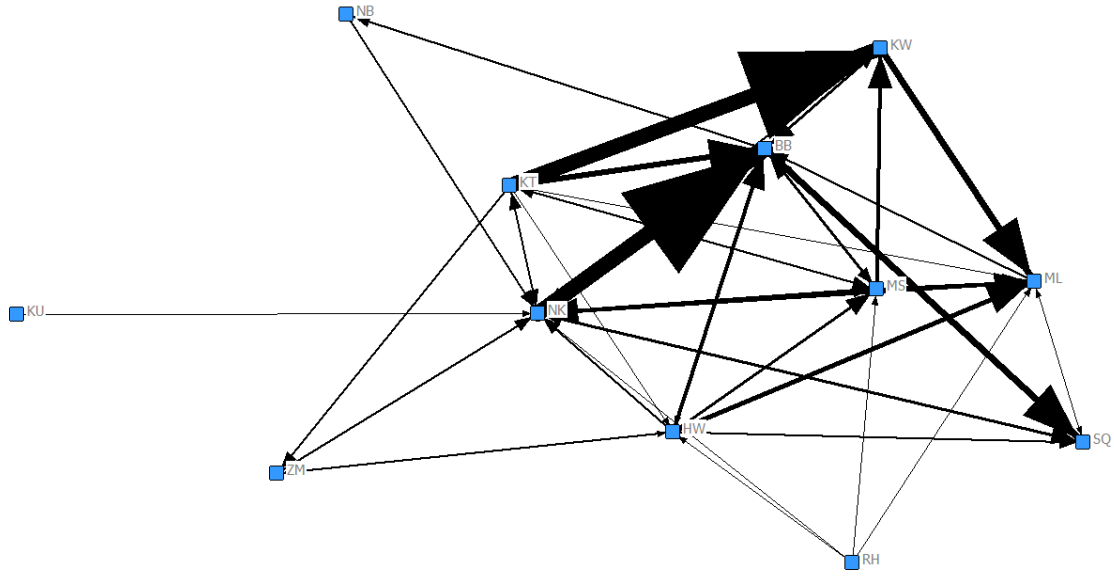

908

909 f)

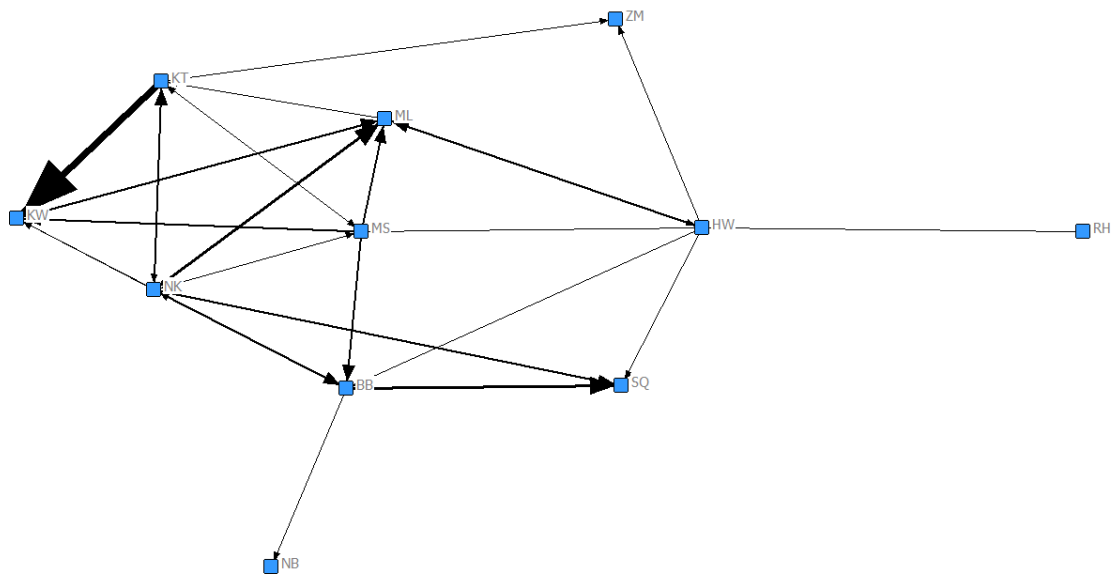

910

911 g)

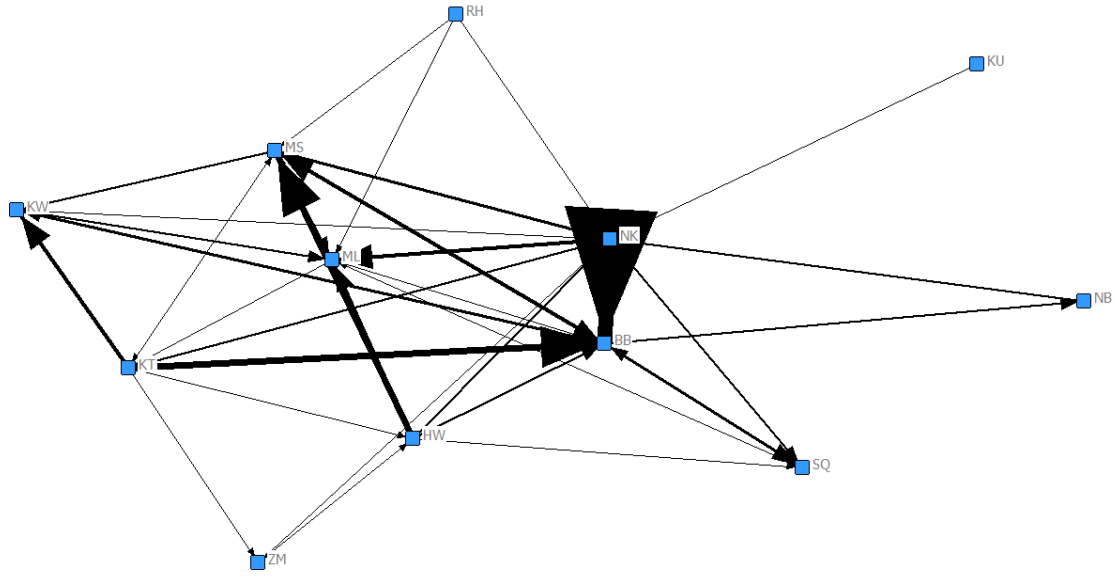

912

913 h)

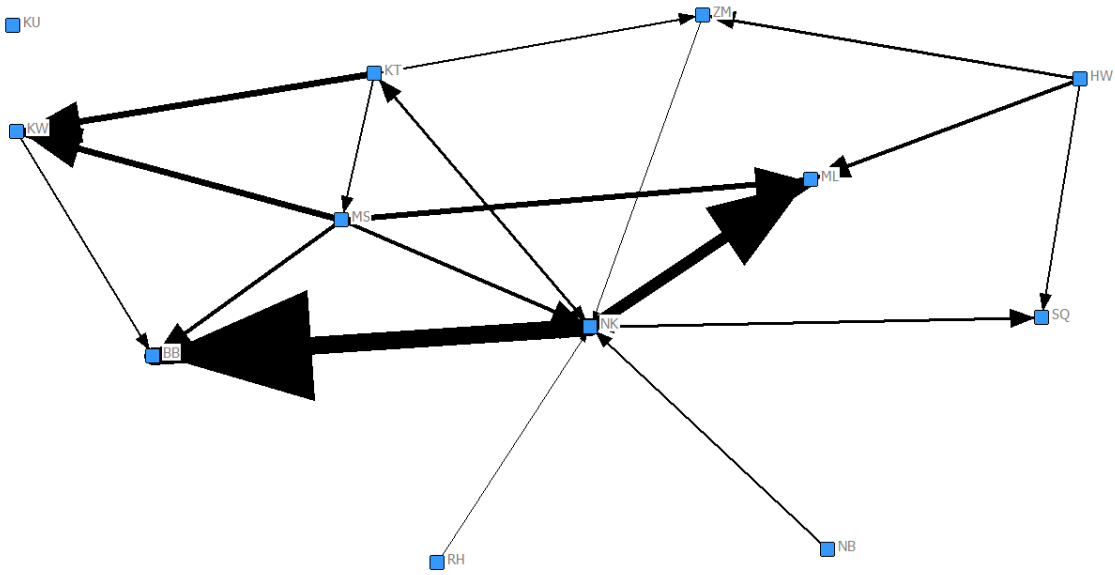

914

915

916 i)

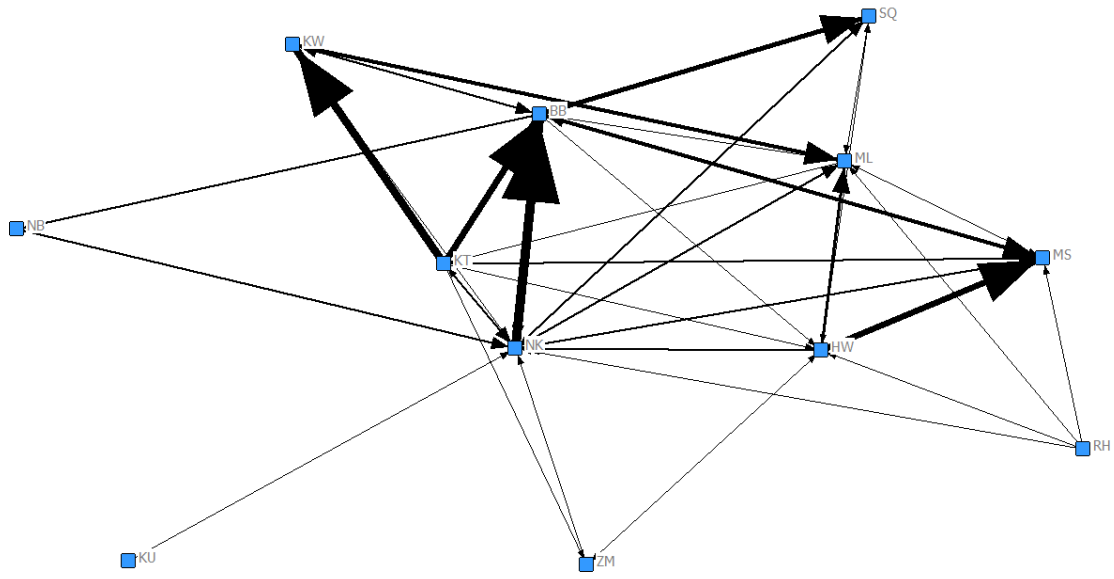

917

918 j)

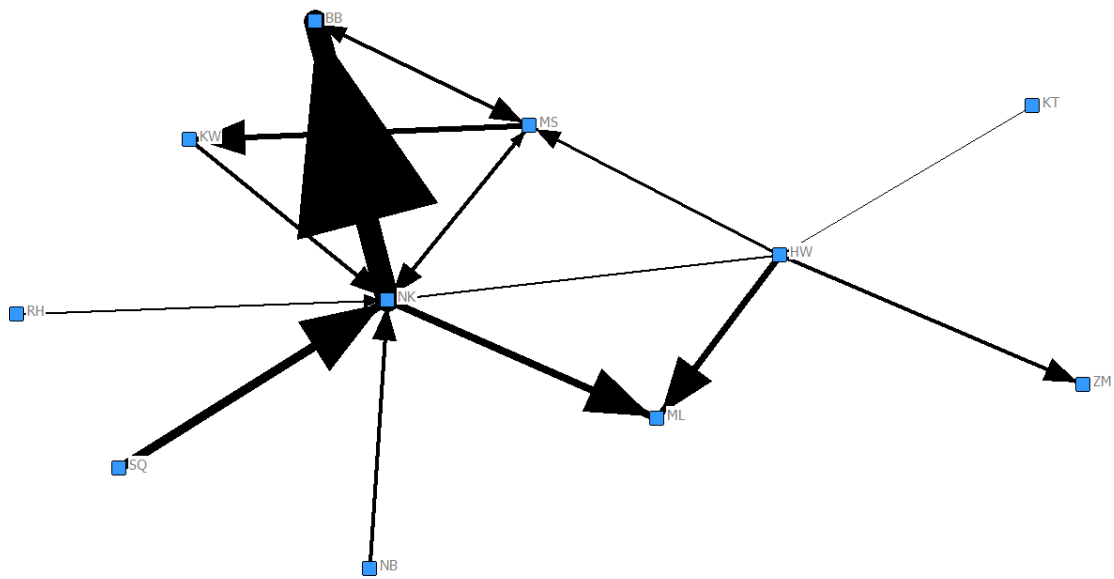

919

920 k)

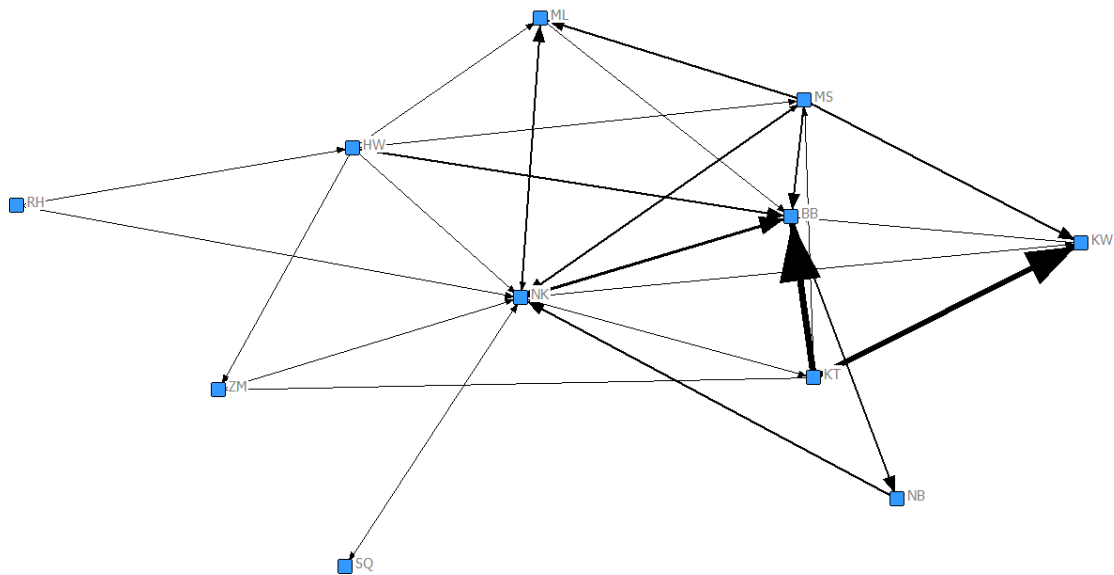

921

922 l)

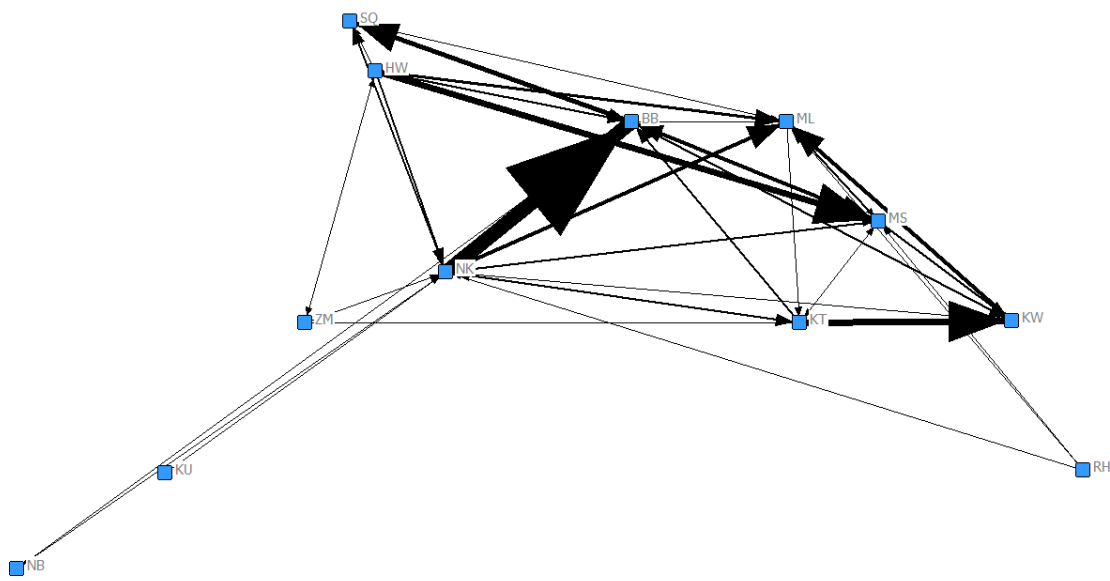

923

924

925 m)

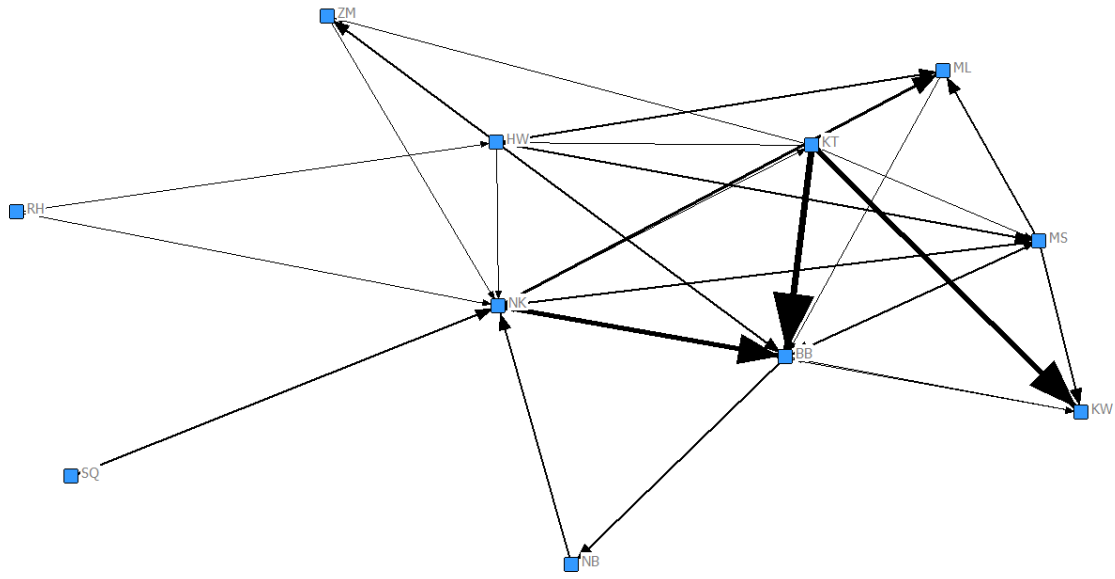

926

927 n)

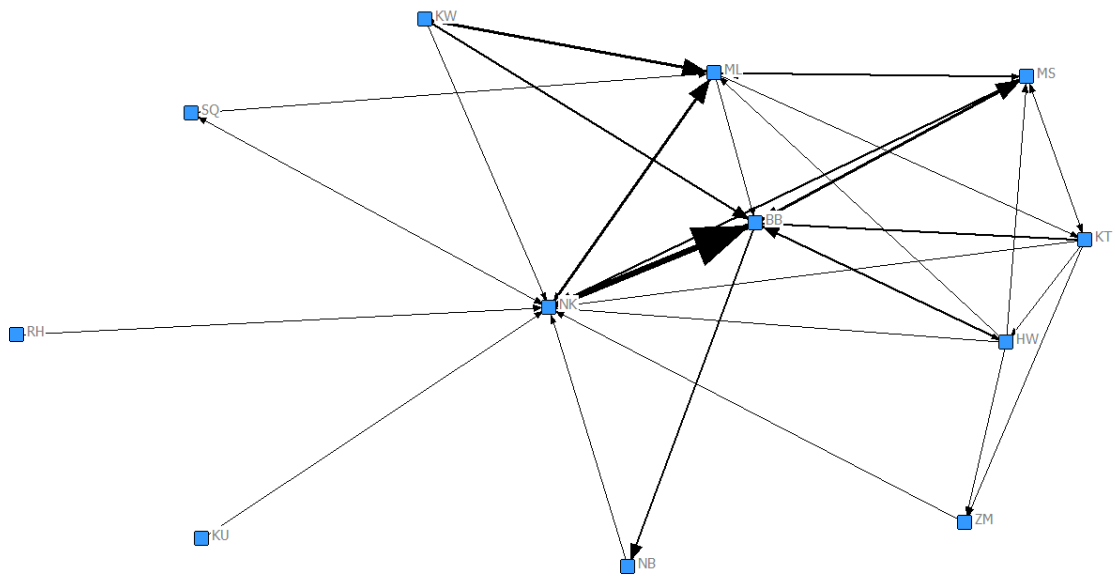

928

929 o)

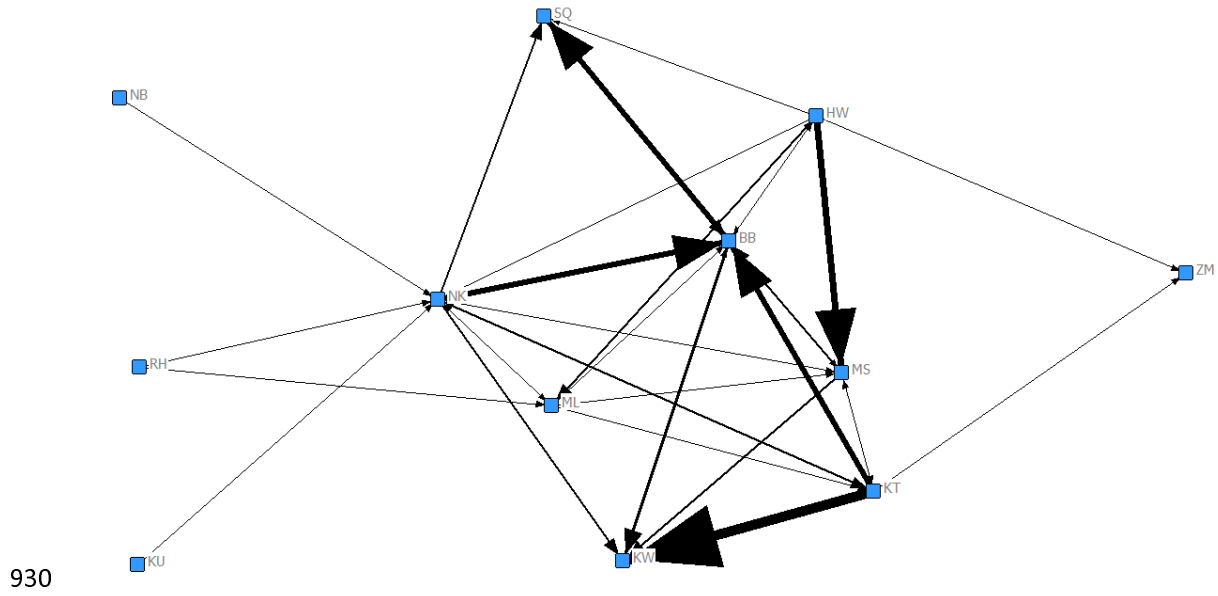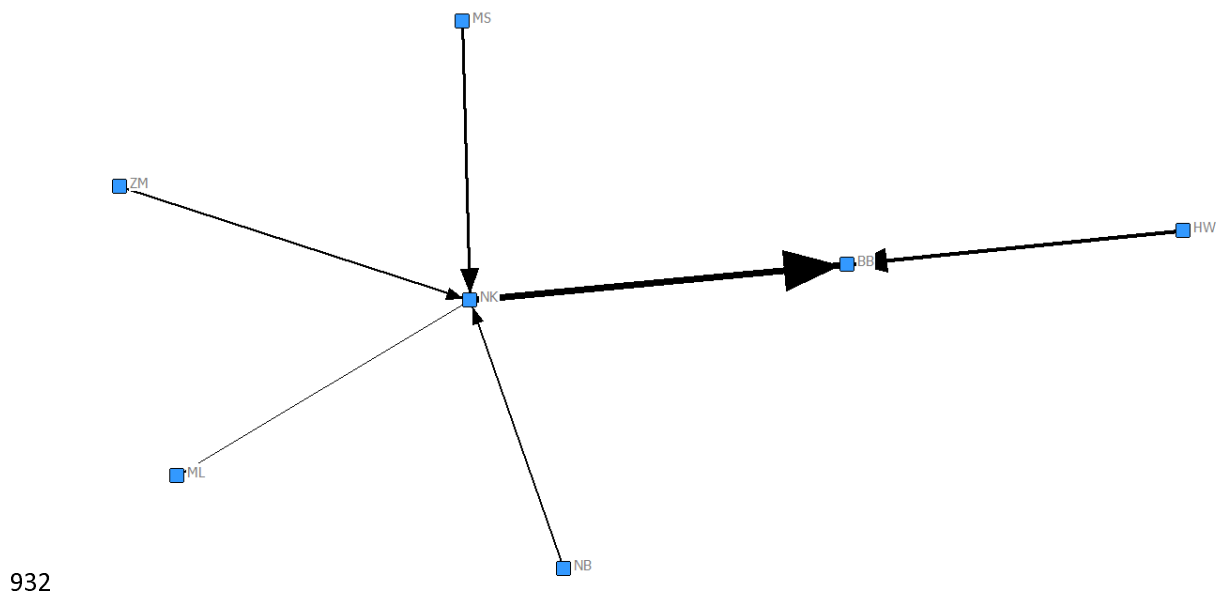



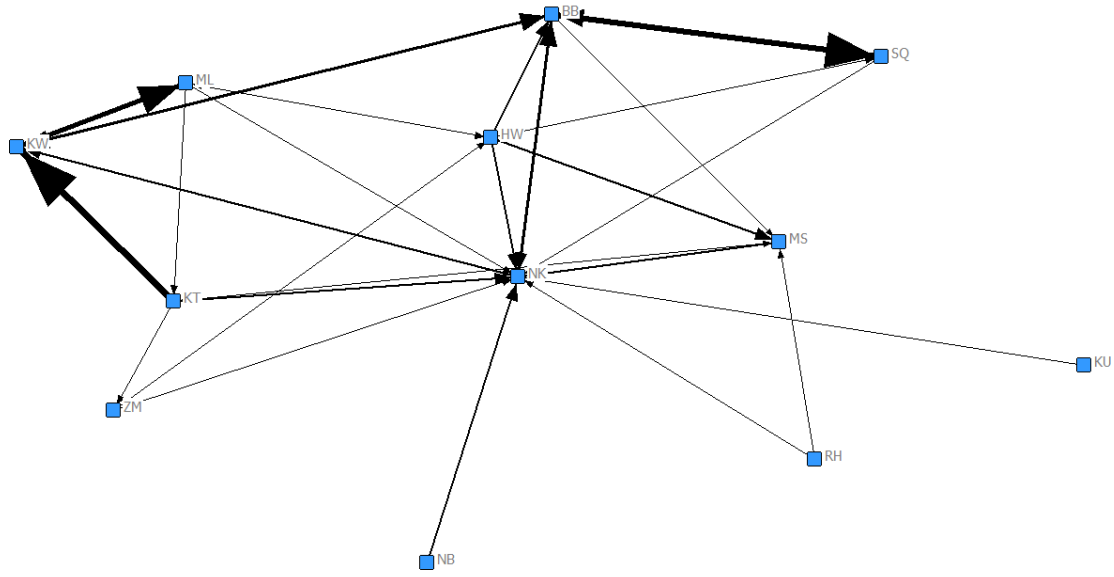

934

935 r)

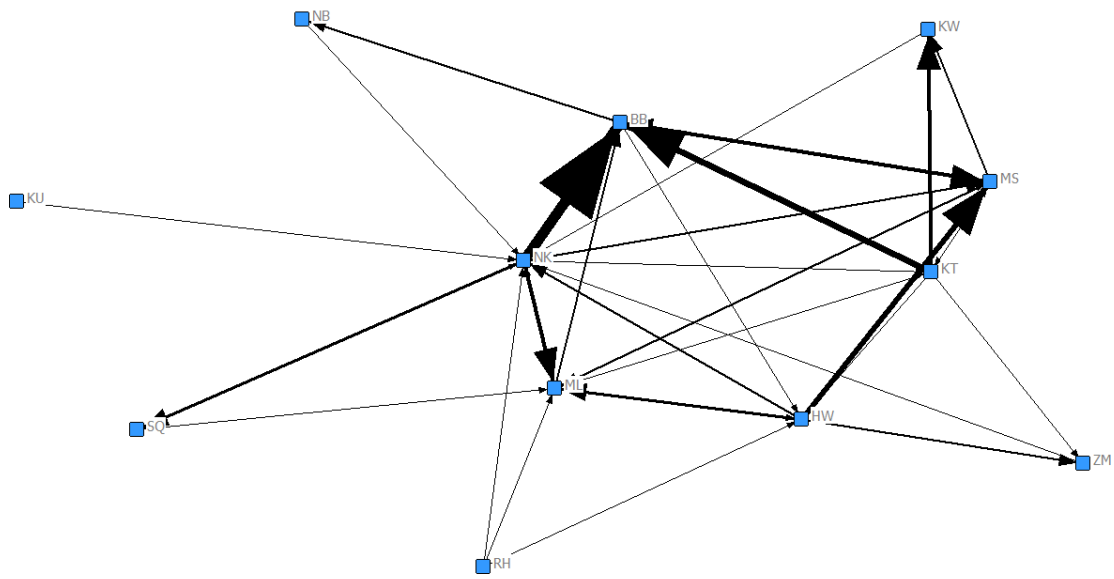

936

937 s)

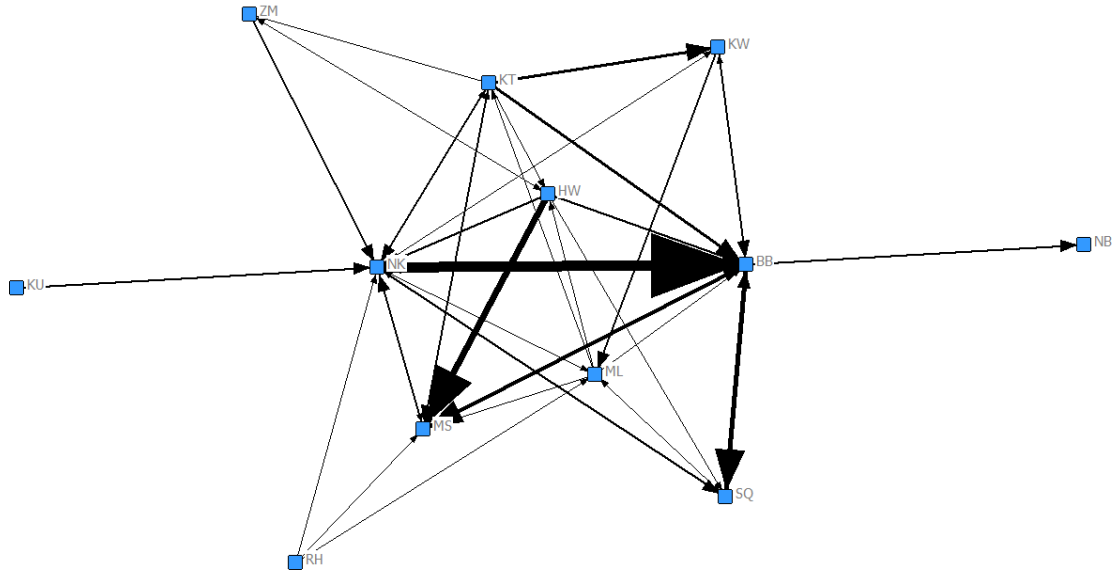

938

939 t)

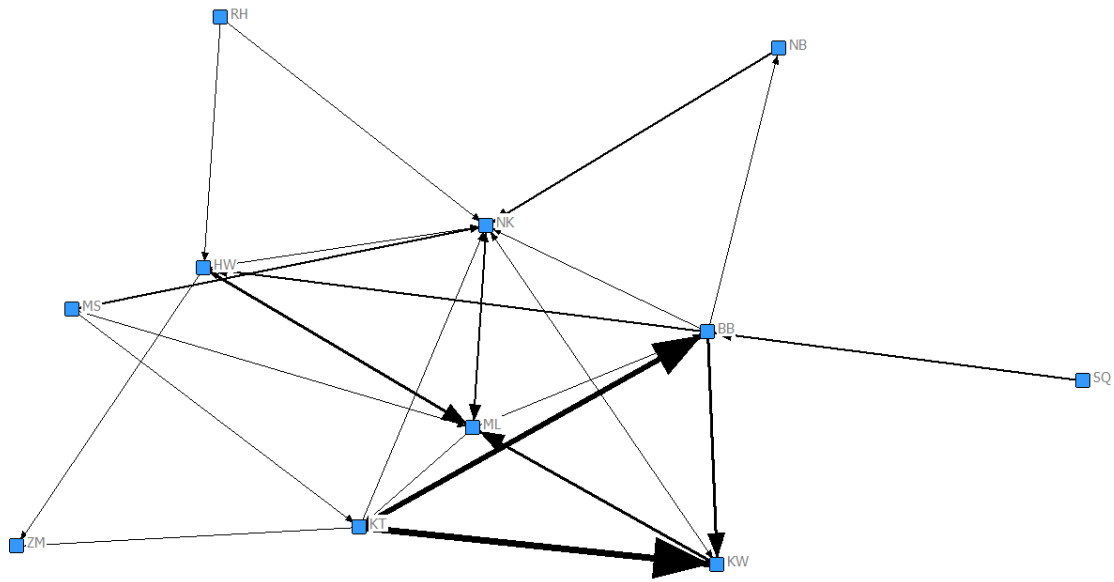

940

## Supplementary Information 1

### Social bonding, gestural complexity and displacement behaviour of wild chimpanzee

Table S1. Definitions, means and standard deviations (SD) for different types of gestural communication. Data based on gestural communication between 132 chimpanzee dyads. All gestural communication measured as the rate per hour dyad spent within 10 m. For detailed description of all gesture types and accompanying video footage see [Roberts et al. , 2014].

| <b>Gesture</b>               | <b>Definition</b>                                                               | <b>Mean</b> | <b>SD</b> |
|------------------------------|---------------------------------------------------------------------------------|-------------|-----------|
| Gesture with no object       | Gesture is produced not using object                                            | 2.56        | 7.14      |
| Gesture with object          | Gesture is produced using object (e.g. shake branch)<br>[Nishida et al. , 2010] | 0.88        | 3.12      |
| Visual gesture               | Perception of gesture is only possible by looking at the signaller              | 1.97        | 5.54      |
| Auditory short-range gesture | Sounds produced by the gesture can be heard within 10 m of the signaller        | 0.41        | 2.33      |
| Auditory long-range gesture  | Sounds produced by the gesture can be heard over 10 m from the signaller        | 0.67        | 2.30      |
| Tactile gesture              | Perception of the gesture is possible via physical contact                      | 0.44        | 2.43      |
| Unimodal gesture             | Gesture does not include accompanying facial expression or vocalization         | 1.79        | 5.81      |
| Multimodal                   | Gesture accompanied by simultaneous production of                               | 0.09        | 0.52      |

|                                       |                                                                                                                                                                                                                                                             |      |      |
|---------------------------------------|-------------------------------------------------------------------------------------------------------------------------------------------------------------------------------------------------------------------------------------------------------------|------|------|
| gesture (facial expression)           | facial expression                                                                                                                                                                                                                                           |      |      |
| Multimodal gesture (vocalization)     | A vocalization is produced whilst the signaller is gesturing                                                                                                                                                                                                | 1.15 | 3.44 |
| Dyadic repertoire size                | The number of gesture types produced towards the dyad partner, per hour spent within 10 m                                                                                                                                                                   | 1.97 | 5.11 |
| Single gesture                        | A single gesture is produced by the signaller                                                                                                                                                                                                               | 2.47 | 6.60 |
| Combined gesture                      | Two or more of different gesture types are produced simultaneously by the signaller (e.g. embrace full and thrust) [Nishida et al. , 2010]                                                                                                                  | 0.46 | 1.70 |
| Gesture with mutual attention absent  | Gesture is not accompanied by simultaneous presence of mutual bodily orientation between signaller and the recipient. Mutual bodily orientation is when signaller's and recipient's body are within each other's field of view (up to 45 degrees body turn) | 0.78 | 3.39 |
| Gesture with mutual attention present | Gesture is accompanied by simultaneous presence of mutual bodily orientation between signaller and the recipient.                                                                                                                                           | 1.23 | 4.15 |
| Bodily                                | A gesture is produced by the signaller with the part of the body (e.g. head, legs, torso) that does not involve                                                                                                                                             | 2.52 | 6.80 |

|                       |                                                                                                                                                                                                                                                                                                                                       |      |      |
|-----------------------|---------------------------------------------------------------------------------------------------------------------------------------------------------------------------------------------------------------------------------------------------------------------------------------------------------------------------------------|------|------|
|                       | use of hands                                                                                                                                                                                                                                                                                                                          |      |      |
| Manual                | A gesture is made exclusively with the hand                                                                                                                                                                                                                                                                                           | 0.93 | 3.19 |
| Events                | Number of consecutive gesture events in the sequence whereby gestures are made in quick succession with or without pauses for response waiting. One gesture event can contain gestures combined or not combined with other gestures (e.g. embrace full and thrust co-occurring would be counted as one event) [Nishida et al. , 2010] | 3.18 | 7.82 |
| Manual indicative     | Movement of the arm and hand towards the recipient, without physical touch or contact with substrate                                                                                                                                                                                                                                  | 0.14 | 0.54 |
| Manual non-indicative | Movement of the arm and hand that involves physical touch or contact with the substrate or visual but does not involve movement of the hand towards the recipient                                                                                                                                                                     | 0.80 | 3.01 |
| Close                 | Signaler produced a gesture within 1 meter from the recipient                                                                                                                                                                                                                                                                         | 1.09 | 4.40 |
| Far                   | Signaler produced a gesture from above 1 meter away from the recipient                                                                                                                                                                                                                                                                | 1.64 | 5.03 |
| Non-repetitive        | A gesture that does not involve repetition of movement in regular and cyclical fashion such as static presentation of a torso for grooming                                                                                                                                                                                            | 1.82 | 5.72 |
| Repetitive            | A gesture involves repetition of movement in regular and cyclical fashion in predictable manner that indicates                                                                                                                                                                                                                        | 1.69 | 4.80 |

|                      |                                                                                                                                                                   |       |       |
|----------------------|-------------------------------------------------------------------------------------------------------------------------------------------------------------------|-------|-------|
|                      | that the movement forms part of one gesture                                                                                                                       |       |       |
| Heterogeneous        | Gesture type occurs only in signaller's repertoire of gestures                                                                                                    | 0.72  | 2.64  |
| Homogeneous          | Gesture type is present in both signaller's and recipient's repertoire of gestures                                                                                | 1.76  | 5.49  |
| Single no sequence   | A single gesture that is not made in series and where there is at least 30 seconds to the next consecutive gesture [Hobaiter and Byrne, 2011]                     | 1.27  | 4.07  |
| Rapid sequence       | A series of gestures without pauses between consecutive gestures [Hobaiter and Byrne, 2011]                                                                       | 0.45  | 1.30  |
| Persistence sequence | A series of gestures whereby there are pauses of up to 5 seconds between consecutive gestures [Hobaiter and Byrne, 2011]                                          | 0.11  | 0.45  |
| Penile erection      | Production of a gesture is accompanied by simultaneous erection of the penis by the signaller                                                                     | 0.19  | 0.99  |
| Piloerection         | Production of a gesture is accompanied by simultaneous involuntary erection of hairs                                                                              | 1.21  | 5.11  |
| Threat to dominate   | Aggressive context with or without physical contact, where there is no tangible reason for conflict of interest but the recipient reacts with fear (e.g. screams) | 0.07  | 0.66  |
| Food sharing         | Context where food is in recipient's possession and in view of the signaller who makes successful or                                                              | 0.002 | 0.031 |

|               |                                                                                                                                                                                                                                 |      |      |
|---------------|---------------------------------------------------------------------------------------------------------------------------------------------------------------------------------------------------------------------------------|------|------|
|               | unsuccessful gestures in anticipation of receiving food item, e.g. beg with hand [Nishida et al. , 2010]                                                                                                                        |      |      |
| Other threat  | Communication motivated by clear conflict of interest, whereby there is aggression over the resource such as food or behavior such as attempt at mating.                                                                        | 0.07 | 0.36 |
| Travel        | Gestures made prior or during travel, which are followed by the recipient relocating together with the signaller, from one location in the habitat to the next.                                                                 | 0.03 | 0.33 |
| Copulation    | Gestures produced by a male or a tumescent female in order to initiate the approach for copulation.                                                                                                                             | 0.14 | 0.79 |
| Reassurance   | Gestures produced in reaction to recipient's distress, fright or hurt by the signallers own behaviour or third party threat.                                                                                                    | 0.08 | 0.87 |
| Greeting      | Gestures made in any of the following contexts: approaching, being approached or leaving approach with the individual who is non-threatening or when the recipient or third party distressed, frightened or hurt the signaller. | 0.27 | 0.74 |
| Mutual groom  | Gestures made to initiate simultaneous grooming between signaller and the recipient.                                                                                                                                            | 0.07 | 0.66 |
| Receive groom | Gestures made to solicit grooming of the signaller by the recipient.                                                                                                                                                            | 0.19 | 0.80 |

|                                      |                                                                                                                                                                                                                                                                                                                                                                                                                         |      |      |
|--------------------------------------|-------------------------------------------------------------------------------------------------------------------------------------------------------------------------------------------------------------------------------------------------------------------------------------------------------------------------------------------------------------------------------------------------------------------------|------|------|
| Give groom                           | Gestures made to initiate grooming of the recipient by the signaller.                                                                                                                                                                                                                                                                                                                                                   | 0.37 | 1.94 |
| Play                                 | Gestures which initiate bouts of wrestling, chasing, tickling in non-agonistic relaxed manner accompanied by play-face.                                                                                                                                                                                                                                                                                                 | 0.17 | 1.99 |
| Synchronized low-intensity panthoot  | Pant-hoot call produced jointly with other group members and accompanied by simultaneous production of visual gestures, which can be perceived only by looking at signaller.                                                                                                                                                                                                                                            | 0.05 | 0.36 |
| Solo high-intensity panthoot         | Pant-hoot call produced solo (without joining in by other group members) and accompanied by simultaneous production of auditory gestures, which produce sounds audible at a distance of at least 10 meters independently of the acoustic properties of the pant-hoot call. If both visual and auditory gestures simultaneously accompanied the pant-hoot call within the same sequence it was scored as high-intensity. | 0.08 | 0.47 |
| Synchronized high-intensity panthoot | Pant-hoot call plus simultaneous production of auditory gestures such as drumming. Vocalisation is produced jointly with other group members.                                                                                                                                                                                                                                                                           | 0.20 | 1.0  |

Table S2. Percentage of indicators for each behavioural categories that is significantly associated with behavioural indices of 5 domains of sociality (joint activity, grooming, visual attention, proximity and scratch).



| Behaviour                | Number of categories of complexity | Joint activity | Groom | Attention | Proximity | Scratch |
|--------------------------|------------------------------------|----------------|-------|-----------|-----------|---------|
| <i>Demography</i>        | 4                                  | 41.67          | 25.00 | 37.50     | 25.00     | 25.00   |
| <i>Object use</i>        | 2                                  | 16.67          | 83.33 | 75.00     | 100.00    | 50.00   |
| <i>Modality</i>          | 4                                  | 41.67          | 75.00 | 50.00     | 75.00     | 50.00   |
| <i>Multimodal</i>        | 3                                  | 22.22          | 55.56 | 66.67     | 100.00    | 66.67   |
| <i>Repertoire size</i>   | 1                                  | 33.33          | 66.67 | 50.00     | 100.00    | 100.00  |
| <i>Combined gestures</i> | 2                                  | 16.67          | 50.00 | 75.00     | 50.00     | 50.00   |
| <i>Attention</i>         | 2                                  | 16.67          | 50.00 | 50.00     | 100.00    | 50.00   |
| <i>Bodily and manual</i> | 2                                  | 16.67          | 66.67 | 25.00     | 50.00     | 100.00  |
| <i>Events</i>            | 1                                  | 33.33          | 66.67 | 100.00    | 100.00    | 100.00  |
| <i>Indicative</i>        | 2                                  | 16.67          | 66.67 | 25.00     | 50.00     | 50.00   |
| <i>Proximity</i>         | 2                                  | 50.00          | 66.67 | 75.00     | 50.00     | 100.00  |
| <i>Repetitive</i>        | 2                                  | 16.67          | 66.67 | 25.00     | 50.00     | 50.00   |

|                        |    |       |       |       |        |        |
|------------------------|----|-------|-------|-------|--------|--------|
| <i>Homogeneity</i>     | 2  | 16.67 | 66.67 | 75.00 | 50.00  | 50.00  |
| <i>Sequences</i>       | 3  | 33.33 | 44.44 | 33.33 | 33.33  | 33.33  |
| <i>Penile erection</i> | 1  | 0.00  | 0.00  | 0.00  | 0.00   | 0.00   |
| <i>Piloerection</i>    | 1  | 33.33 | 33.33 | 50.00 | 100.00 | 100.00 |
| <i>Function</i>        | 14 | 16.67 | 33.33 | 39.29 | 35.71  | 10.71  |

**Association between the duration of social behavior and gestural communication categorized according to structure**

**Demographic Factors**

Supplementary Table S3. MRQAP regression models predicting durations of social behavior, per hour dyad spent within 10m. Predictors were demographic variables. Dyads were classified as same age or different age (within 5 years), same sex or different sex, related by maternal kinship and as the same or different reproductive status (reproductively active, not reproductively active). Based on 132 dyadic relationships of the chimpanzees. Significant *p* values are indicated in bold. R squared ( $r^2$ ) denotes amount of variance in the dependent variable explained by the regression model.

Table S3.1 Duration of joint feeding behaviour ( $r^2 = 0.119$ )

|     | Standardized coefficient | Standard error | <i>p</i>     |
|-----|--------------------------|----------------|--------------|
| Age | -0.01                    | 0.65           | 0.49         |
| Sex | 0.31                     | 0.69           | <b>0.001</b> |

|                     |      |      |             |
|---------------------|------|------|-------------|
| Kinship             | 0.29 | 1.28 | <b>0.01</b> |
| Reproductive status | 0.22 | 0.72 | <b>0.04</b> |

Table S3.2 Duration of joint resting behaviour ( $r^2 = 0.070$ )

|                     | Standardized coefficient | Standard error | <i>p</i>     |
|---------------------|--------------------------|----------------|--------------|
| Age                 | 0.29                     | 1.37           | <b>0.003</b> |
| Sex                 | -0.14                    | 1.31           | 0.13         |
| Kinship             | -0.02                    | 2.25           | 0.47         |
| Reproductive status | -0.04                    | 1.46           | 0.36         |

Table S3.3 Duration of joint travelling behaviour ( $r^2 = 0.09$ )

|                     | Standardized coefficient | Standard error | <i>p</i>    |
|---------------------|--------------------------|----------------|-------------|
| Age                 | 0.28                     | 0.42           | <b>0.01</b> |
| Sex                 | 0.05                     | 0.39           | 0.68        |
| Kinship             | 0.01                     | 0.72           | 0.86        |
| Reproductive status | 0.01                     | 0.43           | 0.93        |

Table S3.4 Duration of giving grooming ( $r^2 = 0.07$ )

|  | Standardized | Standard error | <i>p</i> |
|--|--------------|----------------|----------|
|--|--------------|----------------|----------|

|                     | coefficient |      |             |
|---------------------|-------------|------|-------------|
| Age                 | 0.21        | 0.54 | <b>0.02</b> |
| Sex                 | 0.11        | 0.53 | 0.18        |
| Kinship             | 0.10        | 0.96 | 0.12        |
| Reproductive status | 0.03        | 0.66 | 0.42        |

Table S3.5 Duration of mutual grooming ( $r^2 = 0.04$ )

|                     | Standardized coefficient | Standard error | <i>p</i>     |
|---------------------|--------------------------|----------------|--------------|
| Age                 | 0.20                     | 0.70           | <b>0.050</b> |
| Sex                 | 0.02                     | 0.72           | 0.49         |
| Kinship             | 0.02                     | 1.29           | 0.29         |
| Reproductive status | 0.14                     | 0.87           | 0.18         |

Table S3.6 Duration of receiving grooming ( $r^2 = 0.03$ )

|                     | Standardized coefficient | Standard error | <i>p</i>    |
|---------------------|--------------------------|----------------|-------------|
| Age                 | -0.09                    | 0.48           | 0.18        |
| Sex                 | 0.20                     | 0.51           | <b>0.03</b> |
| Kinship             | -0.01                    | 0.88           | 0.62        |
| Reproductive status | 0.08                     | 0.63           | 0.28        |

Table S3.7 Duration of visual attention towards dyad partner ( $r^2 = 0.11$ )

|                     | Standardized coefficient | Standard error | <i>p</i>    |
|---------------------|--------------------------|----------------|-------------|
| Age                 | 0.12                     | 1.47           | 0.13        |
| Sex                 | 0.30                     | 1.55           | <b>0.01</b> |
| Kinship             | 0.18                     | 2.62           | 0.06        |
| Reproductive status | 0.28                     | 2.12           | <b>0.04</b> |

Table S3.8 Duration of visual attention away dyad partner ( $r^2 = 0.12$ )

|                     | Standardized coefficient | Standard error | <i>p</i>     |
|---------------------|--------------------------|----------------|--------------|
| Age                 | 0.367                    | 1.730          | <b>0.001</b> |
| Sex                 | -0.064                   | 1.277          | 0.251        |
| Kinship             | 0.071                    | 2.783          | 0.145        |
| Reproductive status | 0.041                    | 1.395          | 0.370        |

Table S3.9 Duration of time in close proximity – within 2 m ( $r^2 = 0.11$ )

|         | Standardized coefficient | Standard error | <i>p</i>      |
|---------|--------------------------|----------------|---------------|
| Age     | 0.32                     | 2.50           | <b>0.0005</b> |
| Sex     | 0.12                     | 2.49           | 0.15          |
| Kinship | 0.15                     | 4.39           | 0.06          |

|                     |      |      |      |
|---------------------|------|------|------|
| Reproductive status | 0.14 | 3.55 | 0.19 |
|---------------------|------|------|------|

Table S3.10 Rate of scratch produced ( $r^2 = 0.046$ )

|                     | Standardized coefficient | Standard error | <i>p</i>       |
|---------------------|--------------------------|----------------|----------------|
| Age                 | 0.016                    | 0.606          | 0.41829        |
| Sex                 | 0.201                    | 0.560          | <b>0.03948</b> |
| Kinship             | 0.079                    | 1.143          | 0.18341        |
| Reproductive status | 0.030                    | 0.423          | 0.38131        |

Table S3.11 Rate of scratch received ( $r^2 = 0.046$ )

|                     | Standardized coefficient | Standard error | <i>p</i>       |
|---------------------|--------------------------|----------------|----------------|
| Age                 | 0.02                     | 0.61           | 0.42779        |
| Sex                 | 0.20                     | 0.56           | <b>0.04348</b> |
| Kinship             | 0.08                     | 1.14           | 0.18991        |
| Reproductive status | 0.03                     | 0.44           | 0.37481        |

### Object use in gestural communication

Supplementary Table S4. MRQAP regression models predicting durations of social behavior, per hour dyad spent within 10m. Predictor variables were rates of gestural communication (without objects and with objects) and demographic variables. Based on 132 chimpanzee dyads. Significant  $p$  values are indicated in bold. R squared ( $r^2$ ) denotes amount of variance in the dependent variable explained by the regression model.

Table S4.1 Duration of joint feeding behaviour ( $r^2 = 0.12$ )

|                     | Standardized coefficient | Standard error | $p$          |
|---------------------|--------------------------|----------------|--------------|
| Age                 | -0.01                    | 0.68           | 0.47         |
| Sex                 | 0.31                     | 0.70           | <b>0.003</b> |
| Kinship             | 0.29                     | 1.35           | <b>0.009</b> |
| Reproductive status | 0.22                     | 0.76           | <b>0.047</b> |
| Object use          | -0.01                    | 0.08           | 0.56         |
| No object use       | 0.03                     | 0.04           | 0.30         |

Table S4.2 Duration of joint resting behaviour ( $r^2 = 0.08$ )

|                     | Standardized coefficient | Standard error | $p$         |
|---------------------|--------------------------|----------------|-------------|
| Age                 | 0.28                     | 1.45           | <b>0.01</b> |
| Sex                 | -0.16                    | 1.37           | 0.10        |
| Kinship             | -0.02                    | 2.41           | 0.42        |
| Reproductive status | -0.05                    | 1.45           | 0.35        |
| Object use          | -0.08                    | 0.18           | 0.07        |

|               |      |      |      |
|---------------|------|------|------|
| No object use | 0.10 | 0.08 | 0.07 |
|---------------|------|------|------|

Table S4.3 Duration of joint travelling behaviour ( $r^2 = 0.29$ )

|                     | Standardized coefficient | Standard error | <i>p</i>     |
|---------------------|--------------------------|----------------|--------------|
| Age                 | 0.21                     | 0.35           | <b>0.01</b>  |
| Sex                 | -0.01                    | 0.32           | 0.44         |
| Kinship             | 0.02                     | 0.58           | 0.25         |
| Reproductive status | -0.01                    | 0.32           | 0.46         |
| Object use          | -0.04                    | 0.04           | 0.24         |
| No object use       | 0.47                     | 0.02           | <b>0.005</b> |

Table S4.4 Duration of giving grooming ( $r^2 = 0.39$ )

|                     | Standardized coefficient | Standard error | <i>p</i>     |
|---------------------|--------------------------|----------------|--------------|
| Age                 | 0.12                     | 0.45           | 0.08         |
| Sex                 | 0.02                     | 0.44           | 0.41         |
| Kinship             | 0.10                     | 0.85           | 0.08         |
| Reproductive status | 0.00                     | 0.46           | 0.47         |
| Object use          | -0.20                    | 0.06           | <b>0.01</b>  |
| No object use       | 0.64                     | 0.04           | <b>0.001</b> |

Table S4.5 Duration of mutual grooming ( $r^2 = 0.38$ )



|                     | Standardized coefficient | Standard error | <i>p</i>      |
|---------------------|--------------------------|----------------|---------------|
| Age                 | 0.11                     | 0.55           | 0.10          |
| Sex                 | -0.07                    | 0.53           | 0.24          |
| Kinship             | 0.02                     | 1.00           | 0.26          |
| Reproductive status | 0.10                     | 0.58           | 0.12          |
| Object use          | -0.15                    | 0.07           | <b>0.02</b>   |
| No object use       | 0.64                     | 0.04           | <b>0.0005</b> |

Table S4.6 Duration of receiving grooming ( $r^2 = 0.07$ )

|                     | Standardized coefficient | Standard error | <i>p</i>    |
|---------------------|--------------------------|----------------|-------------|
| Age                 | -0.12                    | 0.49           | 0.09        |
| Sex                 | 0.17                     | 0.49           | 0.05        |
| Kinship             | 0.00                     | 0.91           | 0.66        |
| Reproductive status | 0.07                     | 0.56           | 0.27        |
| Object use          | -0.04                    | 0.06           | 0.34        |
| No object use       | 0.22                     | 0.03           | <b>0.04</b> |

Table S4.7 Duration of visual attention towards dyad partner ( $r^2 = 0.49$ )

|  | Standardized coefficient | Standard error | <i>p</i> |
|--|--------------------------|----------------|----------|
|--|--------------------------|----------------|----------|

|                     |       |      |               |
|---------------------|-------|------|---------------|
| Age                 | 0.02  | 1.10 | 0.39          |
| Sex                 | 0.20  | 1.12 | <b>0.01</b>   |
| Kinship             | 0.19  | 2.11 | <b>0.01</b>   |
| Reproductive status | 0.24  | 1.42 | <b>0.01</b>   |
| Object use          | -0.18 | 0.14 | <b>0.003</b>  |
| No object use       | 0.69  | 0.10 | <b>0.0005</b> |

Table S4.8 Duration of visual attention away from dyad partner ( $r^2 = 0.16$ )

|                     | Standardized coefficient | Standard error | <i>p</i>     |
|---------------------|--------------------------|----------------|--------------|
| Age                 | 0.335                    | 1.671          | <b>0.002</b> |
| Sex                 | -0.083                   | 1.277          | 0.180        |
| Kinship             | 0.069                    | 2.892          | 0.138        |
| Reproductive status | 0.003                    | 1.271          | 0.517        |
| Object use          | -0.098                   | 0.202          | 0.070        |
| No object use       | 0.240                    | 0.097          | <b>0.028</b> |

Table S4.9 Duration of time in close proximity – within 2 m ( $r^2 = 0.37$ )

|     | Standardized coefficient | Standard error | <i>p</i>     |
|-----|--------------------------|----------------|--------------|
| Age | 0.24                     | 2.05           | <b>0.001</b> |

|                     |       |      |               |
|---------------------|-------|------|---------------|
| Sex                 | 0.04  | 2.05 | 0.32          |
| Kinship             | 0.15  | 3.60 | <b>0.03</b>   |
| Reproductive status | 0.11  | 2.54 | 0.17          |
| Object use          | -0.17 | 0.26 | <b>0.003</b>  |
| No object use       | 0.56  | 0.15 | <b>0.0005</b> |

Table S4.10 Rate of scratch produced ( $r^2 = 0.190$ )

|                     | Standardized coefficient | Standard error | <i>p</i>      |
|---------------------|--------------------------|----------------|---------------|
| Age                 | -0.043                   | 0.591          | 0.35782       |
| Sex                 | 0.175                    | 0.525          | 0.05097       |
| Kinship             | 0.085                    | 1.162          | 0.17541       |
| Reproductive status | -0.031                   | 0.438          | 0.33633       |
| Object use          | -0.016                   | 0.072          | 0.49375       |
| No object use       | 0.400                    | 0.034          | <b>0.0045</b> |

Table S4.11 Rate of scratch received ( $r^2 = 0.050$ )

|     | Standardized coefficient | Standard error | <i>p</i> |
|-----|--------------------------|----------------|----------|
| Age | 0.03                     | 0.63           | 0.38331  |

|                     |       |      |                |
|---------------------|-------|------|----------------|
| Sex                 | 0.20  | 0.57 | <b>0.03998</b> |
| Kinship             | 0.08  | 1.12 | 0.17841        |
| Reproductive status | 0.04  | 0.45 | 0.30585        |
| Object use          | -0.01 | 0.08 | 0.56822        |
| No object use       | -0.06 | 0.03 | 0.26087        |

### Modality of gestural communication

Supplementary Table S5. MRQAP regression models predicting durations of social behavior, per hour dyad spent within 10m. Predictor variables were rates of gestural communication of different modalities (visual, tactile, auditory short-range, auditory long-range) and demographic variables. Based on 132 chimpanzee dyads. Significant  $p$  values are indicated in bold. R squared ( $r^2$ ) denotes amount of variance in the dependent variable explained by the regression model.

Table S5.1 Duration of joint feeding behaviour ( $r^2 = 0.17$ )

|                     | Standardized coefficient | Standard error | $p$          |
|---------------------|--------------------------|----------------|--------------|
| Age                 | -0.07                    | 0.68           | 0.27         |
| Sex                 | 0.33                     | 0.70           | <b>0.002</b> |
| Kinship             | 0.29                     | 1.30           | <b>0.01</b>  |
| Reproductive status | 0.21                     | 0.71           | <b>0.03</b>  |
| Visual gestures     | 0.15                     | 0.07           | 0.12         |

|                               |       |      |              |
|-------------------------------|-------|------|--------------|
| Auditory long-range gestures  | -0.08 | 0.13 | 0.21         |
| Auditory short-range gestures | 0.21  | 0.11 | <b>0.04</b>  |
| Tactile gestures              | -0.22 | 0.13 | <b>0.004</b> |

Table S5.2 Duration of joint resting behaviour ( $r^2 = 0.09$ )

|                               | Standardized coefficient | Standard error | <i>p</i>    |
|-------------------------------|--------------------------|----------------|-------------|
| Age                           | 0.26                     | 1.43           | <b>0.01</b> |
| Sex                           | -0.16                    | 1.38           | 0.10        |
| Kinship                       | -0.03                    | 2.43           | 0.39        |
| Reproductive status           | -0.05                    | 1.51           | 0.33        |
| Visual gestures               | 0.02                     | 0.15           | 0.36        |
| Auditory long-range gestures  | -0.06                    | 0.34           | 0.21        |
| Auditory short-range gestures | 0.13                     | 0.24           | <b>0.04</b> |
| Tactile gestures              | 0.004                    | 0.29           | 0.36        |

Table S5.3 Duration of joint travelling behaviour ( $r^2 = 0.32$ )

|  | Standardized coefficient | Standard error | <i>p</i> |
|--|--------------------------|----------------|----------|
|--|--------------------------|----------------|----------|

|                               |       |      |             |
|-------------------------------|-------|------|-------------|
| Age                           | 0.21  | 0.33 | <b>0.01</b> |
| Sex                           | 0.04  | 0.30 | 0.36        |
| Kinship                       | 0.02  | 0.58 | 0.25        |
| Reproductive status           | 0.00  | 0.30 | 0.50        |
| Visual gestures               | 0.62  | 0.04 | <b>0.01</b> |
| Auditory long-range gestures  | -0.28 | 0.08 | <b>0.01</b> |
| Auditory short-range gestures | 0.04  | 0.05 | 0.11        |
| Tactile gestures              | -0.02 | 0.07 | 0.43        |

Table S5.4 Duration of giving grooming ( $r^2 = 0.74$ )

|                               | Standardized coefficient | Standard error | <i>p</i>      |
|-------------------------------|--------------------------|----------------|---------------|
| Age                           | 0.06                     | 0.27           | 0.11          |
| Sex                           | -0.02                    | 0.27           | 0.38          |
| Kinship                       | 0.09                     | 0.47           | <b>0.03</b>   |
| Reproductive status           | 0.00                     | 0.33           | 0.46          |
| Visual gestures               | -0.26                    | 0.04           | <b>0.01</b>   |
| Auditory long-range gestures  | 0.19                     | 0.08           | <b>0.01</b>   |
| Auditory short-range gestures | 0.73                     | 0.09           | <b>0.0005</b> |

|                  |      |      |               |
|------------------|------|------|---------------|
| range gestures   |      |      |               |
| Tactile gestures | 0.41 | 0.08 | <b>0.0005</b> |

Table S5.5 Duration of mutual grooming ( $r^2 = 0.48$ )

|                               | Standardized coefficient | Standard error | <i>p</i>      |
|-------------------------------|--------------------------|----------------|---------------|
| Age                           | 0.12                     | 0.49           | 0.07          |
| Sex                           | -0.01                    | 0.49           | 0.47          |
| Kinship                       | 0.03                     | 0.87           | 0.27          |
| Reproductive status           | 0.12                     | 0.53           | 0.08          |
| Visual gestures               | 0.88                     | 0.07           | <b>0.0005</b> |
| Auditory long-range gestures  | -0.51                    | 0.12           | <b>0.0005</b> |
| Auditory short-range gestures | 0.01                     | 0.08           | 0.25          |
| Tactile gestures              | -0.03                    | 0.10           | 0.37          |

Table S5.6 Duration of receiving grooming ( $r^2 = 0.11$ )

|         | Standardized coefficient | Standard error | <i>p</i>    |
|---------|--------------------------|----------------|-------------|
| Age     | -0.15                    | 0.50           | <b>0.04</b> |
| Sex     | 0.21                     | 0.49           | <b>0.02</b> |
| Kinship | 0.00                     | 0.91           | 0.32        |

|                               |       |      |               |
|-------------------------------|-------|------|---------------|
| Reproductive status           | 0.07  | 0.56 | 0.24          |
| Visual gestures               | 0.50  | 0.06 | <b>0.02</b>   |
| Auditory long-range gestures  | -0.27 | 0.13 | <b>0.02</b>   |
| Auditory short-range gestures | 0.04  | 0.08 | 0.11          |
| Tactile gestures              | -0.20 | 0.12 | <b>0.0005</b> |

Table S5.7 Duration of visual attention towards dyad partner ( $r^2 = 0.21$ )

|                               | Standardized coefficient | Standard error | <i>p</i>      |
|-------------------------------|--------------------------|----------------|---------------|
| Age                           | -0.01                    | 1.06           | 0.47          |
| Sex                           | 0.25                     | 1.13           | <b>0.004</b>  |
| Kinship                       | 0.19                     | 1.97           | <b>0.007</b>  |
| Reproductive status           | 0.26                     | 1.40           | <b>0.007</b>  |
| Visual gestures               | 0.75                     | 0.15           | <b>0.0005</b> |
| Auditory long-range gestures  | -0.44                    | 0.25           | <b>0.0005</b> |
| Auditory short-range gestures | 0.24                     | 0.19           | <b>0.01</b>   |
| Tactile gestures              | -0.02                    | 0.22           | 0.50          |

Table S5.8 Duration of visual attention away from dyad partner ( $r^2 = 0.20$ )



|                               | Standardized coefficient | Standard error | <i>p</i>     |
|-------------------------------|--------------------------|----------------|--------------|
| Age                           | 0.296                    | 1.683          | <b>0.004</b> |
| Sex                           | -0.083                   | 1.347          | 0.178        |
| Kinship                       | 0.064                    | 2.799          | 0.129        |
| Reproductive status           | 0.001                    | 1.338          | 0.496        |
| Auditory long-range gestures  | -0.032                   | 0.368          | 0.412        |
| Auditory short-range gestures | 0.290                    | 0.285          | <b>0.011</b> |
| Tactile gestures              | 0.031                    | 0.366          | 0.247        |
| Visual gestures               | 0.033                    | 0.179          | 0.327        |

Table S5.9 Duration of time in close proximity – within 2 m ( $r^2 = 0.40$ )

|                     | Standardized coefficient | Standard error | <i>p</i>    |
|---------------------|--------------------------|----------------|-------------|
| Age                 | 0.20                     | 2.05           | <b>0.01</b> |
| Sex                 | 0.07                     | 2.05           | 0.22        |
| Kinship             | 0.15                     | 3.65           | <b>0.03</b> |
| Reproductive status | 0.12                     | 2.59           | 0.15        |
| Visual gestures     | 0.45                     | 0.28           | <b>0.01</b> |

|                               |       |      |             |
|-------------------------------|-------|------|-------------|
|                               |       |      |             |
| Auditory long-range gestures  | -0.27 | 0.48 | <b>0.01</b> |
| Auditory short-range gestures | 0.34  | 0.39 | <b>0.01</b> |
| Tactile gestures              | 0.01  | 0.42 | 0.33        |

Table S5.10 Rate of scratch produced ( $r^2 = 0.201$ )

|                               | Standardized coefficient | Standard error | <i>p</i>       |
|-------------------------------|--------------------------|----------------|----------------|
| Age                           | -0.064                   | 0.601          | 0.27286        |
| Sex                           | 0.208                    | 0.529          | <b>0.02699</b> |
| Kinship                       | 0.090                    | 1.128          | 0.14893        |
| Reproductive status           | -0.019                   | 0.430          | 0.41979        |
| Visual gestures               | 0.484                    | 0.071          | <b>0.0085</b>  |
| Auditory long-range gestures  | -0.163                   | 0.126          | <b>0.04698</b> |
| Auditory short-range gestures | 0.127                    | 0.100          | 0.07496        |
| Tactile gestures              | -0.072                   | 0.120          | 0.2014         |

Table S5.11 Rate of scratch received ( $r^2 = 0.060$ )

|                               | Standardized coefficient | Standard error | <i>p</i>       |
|-------------------------------|--------------------------|----------------|----------------|
| Age                           | 0.03                     | 0.65           | 0.34983        |
| Sex                           | 0.21                     | 0.60           | <b>0.03448</b> |
| Kinship                       | 0.08                     | 1.23           | 0.18041        |
| Reproductive status           | 0.04                     | 0.45           | 0.29135        |
| Visual gestures               | 0.08                     | 0.07           | 0.22539        |
| Auditory long-range gestures  | -0.08                    | 0.14           | 0.23138        |
| Auditory short-range gestures | -0.10                    | 0.10           | <b>0.04948</b> |
| Tactile gestures              | -0.07                    | 0.13           | 0.27186        |

### Unimodal and multimodal gestural communication

Supplementary Table S6. MRQAP regression models predicting durations of social behavior, per hour dyad spent within 10m. Predictor variables were rates of unimodal and multi-modal gestural communication and demographic variables. Based on 132 chimpanzee dyads. Significant *p* values are indicated in bold. R squared ( $r^2$ ) denotes amount of variance in the dependent variable explained by the regression model.

Table S6.1 Duration of joint feeding behaviour ( $r^2 = 0.14$ )

|                                 | Standardized coefficient | Standard error | <i>p</i>     |
|---------------------------------|--------------------------|----------------|--------------|
| Age                             | -0.01                    | 0.69           | 0.47         |
| Sex                             | 0.31                     | 0.68           | <b>0.002</b> |
| Kinship                         | 0.28                     | 1.29           | <b>0.01</b>  |
| Reproductive status             | 0.20                     | 0.73           | <b>0.04</b>  |
| Unimodal gestures               | 0.16                     | 0.05           | 0.07         |
| Multimodal (facial expressions) | -0.13                    | 0.53           | 0.09         |
| Multimodal (vocalisations)      | -0.07                    | 0.07           | 0.23         |

Table S6.2 Duration of joint resting behaviour ( $r^2 = 0.08$ )

|                     | Standardized coefficient | Standard error | <i>p</i>     |
|---------------------|--------------------------|----------------|--------------|
| Age                 | 0.28                     | 1.45           | <b>0.004</b> |
| Sex                 | -0.16                    | 1.36           | 0.10         |
| Kinship             | -0.02                    | 2.41           | 0.41         |
| Reproductive status | -0.06                    | 1.48           | 0.36         |
| Unimodal gestures   | 0.06                     | 0.11           | 0.19         |
| Multimodal (facial) | 0.06                     | 1.12           | 0.15         |

|                               |       |      |      |
|-------------------------------|-------|------|------|
| expressions)                  |       |      |      |
| Multimodal<br>(vocalisations) | -0.06 | 0.16 | 0.20 |

Table S6.3 Duration of joint travelling behaviour ( $r^2 = 0.31$ )

|                                       | Standardized<br>coefficient | Standard error | <i>p</i>    |
|---------------------------------------|-----------------------------|----------------|-------------|
| Age                                   | 0.24                        | 0.34           | <b>0.01</b> |
| Sex                                   | -0.01                       | 0.31           | 0.41        |
| Kinship                               | 0.02                        | 0.62           | 0.25        |
| Reproductive<br>status                | -0.02                       | 0.32           | 0.43        |
| Unimodal<br>gestures                  | 0.22                        | 0.03           | <b>0.02</b> |
| Multimodal<br>(facial<br>expressions) | 0.30                        | 0.31           | <b>0.02</b> |
| Multimodal<br>(vocalisations)         | 0.01                        | 0.04           | 0.30        |

Table S6.4 Duration of giving grooming ( $r^2 = 0.46$ )

|     | Standardized<br>coefficient | Standard error | <i>p</i>    |
|-----|-----------------------------|----------------|-------------|
| Age | 0.13                        | 0.38           | <b>0.03</b> |
| Sex | 0.05                        | 0.38           | 0.24        |

|                                 |       |      |               |
|---------------------------------|-------|------|---------------|
| Kinship                         | 0.11  | 0.72 | 0.05          |
| Reproductive status             | -0.02 | 0.42 | 0.39          |
| Unimodal gestures               | 0.75  | 0.04 | <b>0.0005</b> |
| Multimodal (facial expressions) | -0.23 | 0.40 | <b>0.01</b>   |
| Multimodal (vocalisations)      | -0.07 | 0.05 | 0.09          |

Table S6.5 Duration of mutual grooming ( $r^2 = 0.42$ )

|                                 | Standardized coefficient | Standard error | <i>p</i>     |
|---------------------------------|--------------------------|----------------|--------------|
| Age                             | 0.15                     | 0.54           | <b>0.04</b>  |
| Sex                             | -0.07                    | 0.52           | 0.21         |
| Kinship                         | 0.02                     | 0.94           | 0.29         |
| Reproductive status             | 0.09                     | 0.57           | 0.16         |
| Unimodal gestures               | 0.27                     | 0.04           | <b>0.02</b>  |
| Multimodal (facial expressions) | 0.44                     | 0.47           | <b>0.002</b> |
| Multimodal                      | -0.03                    | 0.06           | 0.33         |

|                 |  |  |  |
|-----------------|--|--|--|
| (vocalisations) |  |  |  |
|-----------------|--|--|--|

Table S6.6 Duration of receiving grooming ( $r^2 = 0.08$ )

|                                 | Standardized coefficient | Standard error | $p$         |
|---------------------------------|--------------------------|----------------|-------------|
| Age                             | -0.11                    | 0.52           | 0.12        |
| Sex                             | 0.17                     | 0.52           | 0.06        |
| Kinship                         | 0.00                     | 0.93           | 0.65        |
| Reproductive status             | 0.04                     | 0.61           | 0.36        |
| Unimodal gestures               | 0.25                     | 0.04           | <b>0.04</b> |
| Multimodal (facial expressions) | 0.001                    | 0.44           | 0.43        |
| Multimodal (vocalisations)      | -0.09                    | 0.05           | 0.06        |

Table S6.7 Duration of visual attention towards dyad partner ( $r^2 = 0.50$ )

|         | Standardized coefficient | Standard error | $p$         |
|---------|--------------------------|----------------|-------------|
| Age     | 0.06                     | 1.06           | 0.21        |
| Sex     | 0.20                     | 1.11           | <b>0.01</b> |
| Kinship | 0.19                     | 1.98           | <b>0.01</b> |

|                                 |       |      |               |
|---------------------------------|-------|------|---------------|
| Reproductive status             | 0.22  | 1.46 | <b>0.02</b>   |
| Unimodal gestures               | 0.44  | 0.09 | <b>0.0005</b> |
| Multimodal (facial expressions) | 0.31  | 0.93 | <b>0.003</b>  |
| Multimodal (vocalisations)      | -0.09 | 0.12 | <b>0.05</b>   |

Table S6.8 Duration of visual attention away from dyad partner ( $r^2 = 0.17$ )

|                                 | Standardized coefficient | Standard error | <i>p</i>     |
|---------------------------------|--------------------------|----------------|--------------|
| Age                             | 0.344                    | 1.712          | <b>0.001</b> |
| Sex                             | -0.065                   | 1.286          | 0.254        |
| Kinship                         | 0.071                    | 2.929          | 0.142        |
| Reproductive status             | -0.003                   | 1.331          | 0.471        |
| Multimodal (facial expressions) | -0.043                   | 1.405          | 0.295        |
| Multimodal (vocalisations)      | -0.076                   | 0.195          | 0.123        |



|                   |       |       |              |
|-------------------|-------|-------|--------------|
| Unimodal gestures | 0.270 | 0.132 | <b>0.024</b> |
|-------------------|-------|-------|--------------|

Table S6.9 Duration of time in close proximity – within 2 m ( $r^2 = 0.37$ )

|                                 | Standardized coefficient | Standard error | <i>p</i>     |
|---------------------------------|--------------------------|----------------|--------------|
| Age                             | 0.27                     | 2.07           | <b>0.002</b> |
| Sex                             | 0.05                     | 2.01           | 0.31         |
| Kinship                         | 0.15                     | 3.55           | <b>0.03</b>  |
| Reproductive status             | 0.09                     | 2.54           | 0.22         |
| Unimodal gestures               | 0.44                     | 0.17           | <b>0.001</b> |
| Multimodal (facial expressions) | 0.14                     | 1.69           | <b>0.05</b>  |
| Multimodal (vocalisations)      | -0.11                    | 0.23           | <b>0.04</b>  |

Table S6.10 Rate of scratch produced ( $r^2 = 0.191$ )

|     | Standardized coefficient | Standard error | <i>p</i> |
|-----|--------------------------|----------------|----------|
| Age | -0.029                   | 0.593          | 0.37781  |
| Sex | 0.171                    | 0.536          | 0.05847  |

|                                 |        |       |                |
|---------------------------------|--------|-------|----------------|
| Kinship                         | 0.089  | 1.098 | 0.14393        |
| Reproductive status             | -0.018 | 0.448 | 0.43278        |
| Unimodal gestures               | 0.180  | 0.045 | <b>0.04948</b> |
| Multimodal (facial expressions) | 0.184  | 0.489 | <b>0.04298</b> |
| Multimodal (vocalisations)      | 0.138  | 0.065 | 0.06597        |

Table S6.11 Rate of scratch received ( $r^2 = 0.056$ )

|                     | Standardized coefficient | Standard error | <i>p</i>       |
|---------------------|--------------------------|----------------|----------------|
| Age                 | 0.03                     | 0.65           | 0.38331        |
| Sex                 | 0.20                     | 0.56           | <b>0.03448</b> |
| Kinship             | 0.08                     | 1.18           | 0.2004         |
| Reproductive status | 0.04                     | 0.47           | 0.29685        |
| Unimodal gestures   | -0.12                    | 0.05           | 0.11894        |
| Multimodal (facial) | 0.06                     | 0.52           | 0.26737        |

|                               |      |      |         |
|-------------------------------|------|------|---------|
| expressions)                  |      |      |         |
| Multimodal<br>(vocalisations) | 0.00 | 0.07 | 0.45377 |

### Dyadic repertoire size

Supplementary Table S7. MRQAP regression models predicting durations of social behavior, per hour dyad spent within 10m. Predictor variables were dyadic repertoire size, per hour dyad spent within 10m and demographic variables. Based on 132 chimpanzee dyads. Significant  $p$  values are indicated in bold. R squared ( $r^2$ ) denotes amount of variance in the dependent variable explained by the regression model.

Table S7.1 Duration of joint feeding behaviour ( $r^2 = 0.12$ )

|                        | Standardized coefficient | Standard error | $p$           |
|------------------------|--------------------------|----------------|---------------|
| Age                    | -0.01                    | 0.65           | 0.49          |
| Sex                    | 0.31                     | 0.68           | <b>0.0005</b> |
| Kinship                | 0.28                     | 1.32           | <b>0.01</b>   |
| Reproductive status    | 0.22                     | 0.75           | <b>0.04</b>   |
| Dyadic repertoire size | -0.02                    | 0.04           | 0.45          |

Table S7.2 Duration of joint resting behaviour ( $r^2 = 0.07$ )

|     | Standardized coefficient | Standard error | $p$          |
|-----|--------------------------|----------------|--------------|
| Age | 0.29                     | 1.43           | <b>0.003</b> |

|                        |       |      |      |
|------------------------|-------|------|------|
| Sex                    | -0.14 | 1.30 | 0.13 |
| Kinship                | -0.02 | 2.58 | 0.43 |
| Reproductive status    | -0.04 | 1.45 | 0.36 |
| Dyadic repertoire size | 0.001 | 0.10 | 0.38 |

Table S7.3 Duration of joint travelling behaviour ( $r^2 = 0.21$ )

|                        | Standardized coefficient | Standard error | $p$         |
|------------------------|--------------------------|----------------|-------------|
| Age                    | 0.25                     | 0.38           | <b>0.01</b> |
| Sex                    | 0.05                     | 0.34           | 0.36        |
| Kinship                | 0.03                     | 0.66           | 0.24        |
| Reproductive status    | 0.02                     | 0.36           | 0.41        |
| Dyadic repertoire size | 0.34                     | 0.03           | <b>0.01</b> |

Table S7.4 Duration of giving grooming ( $r^2 = 0.13$ )

|         | Standardized coefficient | Standard error | $p$         |
|---------|--------------------------|----------------|-------------|
| Age     | 0.18                     | 0.53           | <b>0.02</b> |
| Sex     | 0.10                     | 0.52           | 0.17        |
| Kinship | 0.11                     | 0.97           | 0.11        |

|                        |      |      |             |
|------------------------|------|------|-------------|
| Reproductive status    | 0.04 | 0.60 | 0.37        |
| Dyadic repertoire size | 0.26 | 0.04 | <b>0.02</b> |

Table S7.5 Duration of mutual grooming ( $r^2 = 0.24$ )

|                        | Standardized coefficient | Standard error | <i>p</i>     |
|------------------------|--------------------------|----------------|--------------|
| Age                    | 0.16                     | 0.60           | <b>0.05</b>  |
| Sex                    | 0.01                     | 0.59           | 0.51         |
| Kinship                | 0.04                     | 1.11           | 0.22         |
| Reproductive status    | 0.15                     | 0.68           | 0.11         |
| Dyadic repertoire size | 0.45                     | 0.05           | <b>0.003</b> |

Table S7.6 Duration of receiving grooming ( $r^2 = 0.04$ )

|                     | Standardized coefficient | Standard error | <i>p</i>    |
|---------------------|--------------------------|----------------|-------------|
| Age                 | -0.10                    | 0.49           | 0.13        |
| Sex                 | 0.20                     | 0.50           | <b>0.03</b> |
| Kinship             | 0.00                     | 0.87           | 0.33        |
| Reproductive status | 0.08                     | 0.60           | 0.24        |

|                        |      |      |      |
|------------------------|------|------|------|
| Dyadic repertoire size | 0.14 | 0.04 | 0.08 |
|------------------------|------|------|------|

Table S7.7 Duration of visual attention towards dyad partner ( $r^2 = 0.28$ )

|                        | Standardized coefficient | Standard error | <i>p</i>     |
|------------------------|--------------------------|----------------|--------------|
| Age                    | 0.08                     | 1.24           | 0.16         |
| Sex                    | 0.29                     | 1.38           | <b>0.002</b> |
| Kinship                | 0.21                     | 2.50           | <b>0.02</b>  |
| Reproductive status    | 0.29                     | 1.87           | <b>0.02</b>  |
| Dyadic repertoire size | 0.42                     | 0.11           | <b>0.002</b> |

Table S7.8 Duration of visual attention away from dyad partner ( $r^2 = 0.12$ )

|                        | Standardized coefficient | Standard error | <i>p</i>     |
|------------------------|--------------------------|----------------|--------------|
| Age                    | 0.361                    | 1.687          | <b>0.001</b> |
| Sex                    | -0.065                   | 1.276          | 0.255        |
| Kinship                | 0.074                    | 2.826          | 0.129        |
| Reproductive status    | 0.036                    | 1.371          | 0.370        |
| Dyadic repertoire size | 0.063                    | 0.119          | 0.164        |

Table S7.9 Duration of time in close proximity – within 2 m ( $r^2 = 0.21$ )

|                        | Standardized coefficient | Standard error | <i>p</i>     |
|------------------------|--------------------------|----------------|--------------|
| Age                    | 0.29                     | 2.38           | <b>0.001</b> |
| Sex                    | 0.11                     | 2.27           | 0.15         |
| Kinship                | 0.16                     | 4.12           | <b>0.03</b>  |
| Reproductive status    | 0.15                     | 3.25           | 0.14         |
| Dyadic repertoire size | 0.28                     | 0.20           | <b>0.01</b>  |

Table S7.10 Rate of scratch produced ( $r^2 = 0.167$ )

|                        | Standardized coefficient | Standard error | <i>p</i>       |
|------------------------|--------------------------|----------------|----------------|
| Age                    | -0.016                   | 0.583          | 0.43878        |
| Sex                    | 0.193                    | 0.529          | <b>0.03398</b> |
| Kinship                | 0.096                    | 1.076          | 0.13343        |
| Reproductive status    | 0.008                    | 0.417          | 0.45527        |
| Dyadic repertoire size | 0.352                    | 0.042          | <b>0.002</b>   |

Table S7.11 Rate of scratch received ( $r^2 = 0.048$ )

|                        | Standardized coefficient | Standard error | <i>p</i>       |
|------------------------|--------------------------|----------------|----------------|
| Age                    | 0.02                     | 0.62           | 0.42829        |
| Sex                    | 0.20                     | 0.55           | <b>0.03698</b> |
| Kinship                | 0.08                     | 1.21           | 0.21039        |
| Reproductive status    | 0.03                     | 0.44           | 0.38131        |
| Dyadic repertoire size | -0.04                    | 0.04           | 0.33483        |

### Single and combined gestures

Supplementary Table S8. MRQAP regression models predicting durations of social behavior, per hour dyad spent within 10m. Predictor variables were rates of single and combined gestures, per hour dyad spent within 10m and demographic variables. Based on 132 chimpanzee dyads. Significant *p* values are indicated in bold. R squared ( $r^2$ ) denotes amount of variance in the dependent variable explained by the regression model.

Table S8.1 Duration of joint feeding behaviour ( $r^2 = 0.12$ )

|                     | Standardized coefficient | Standard error | <i>p</i>     |
|---------------------|--------------------------|----------------|--------------|
| Age                 | -0.01                    | 0.71           | 0.47         |
| Sex                 | 0.31                     | 0.68           | <b>0.001</b> |
| Kinship             | 0.29                     | 1.34           | <b>0.01</b>  |
| Reproductive status | 0.22                     | 0.77           | <b>0.048</b> |
| Combined gesture    | 0.01                     | 0.16           | 0.43         |



|                |      |      |      |
|----------------|------|------|------|
| Single gesture | 0.02 | 0.04 | 0.42 |
|----------------|------|------|------|

Table S8.2 Duration of joint resting behaviour ( $r^2 = 0.07$ )

|                     | Standardized coefficient | Standard error | <i>p</i>     |
|---------------------|--------------------------|----------------|--------------|
| Age                 | 0.28                     | 1.38           | <b>0.002</b> |
| Sex                 | -0.15                    | 1.32           | 0.11         |
| Kinship             | -0.02                    | 2.50           | 0.46         |
| Reproductive status | -0.04                    | 1.47           | 0.37         |
| Combined gesture    | -0.03                    | 0.34           | 0.37         |
| Single gesture      | 0.06                     | 0.10           | 0.17         |

Table S8.3 Duration of joint travelling behaviour ( $r^2 = 0.31$ )

|                     | Standardized coefficient | Standard error | <i>p</i>     |
|---------------------|--------------------------|----------------|--------------|
| Age                 | 0.23                     | 0.35           | <b>0.01</b>  |
| Sex                 | 0.05                     | 0.32           | 0.31         |
| Kinship             | 0.03                     | 0.64           | 0.24         |
| Reproductive status | -0.01                    | 0.32           | 0.44         |
| Combined gesture    | 0.41                     | 0.09           | <b>0.004</b> |

|                |      |      |      |
|----------------|------|------|------|
| Single gesture | 0.09 | 0.02 | 0.12 |
|----------------|------|------|------|

Table S8.4 Duration of giving grooming ( $r^2 = 0.35$ )

|                     | Standardized coefficient | Standard error | <i>p</i>     |
|---------------------|--------------------------|----------------|--------------|
| Age                 | 0.13                     | 0.47           | 0.06         |
| Sex                 | 0.06                     | 0.46           | 0.25         |
| Kinship             | 0.11                     | 0.84           | 0.07         |
| Reproductive status | 0.06                     | 0.51           | 0.30         |
| Combined gesture    | -0.19                    | 0.12           | <b>0.02</b>  |
| Single gesture      | 0.64                     | 0.04           | <b>0.001</b> |

Table S8.5 Duration of mutual grooming ( $r^2 = 0.32$ )

|                     | Standardized coefficient | Standard error | <i>p</i>     |
|---------------------|--------------------------|----------------|--------------|
| Age                 | 0.14                     | 0.57           | 0.07         |
| Sex                 | 0.00                     | 0.53           | 0.52         |
| Kinship             | 0.04                     | 1.04           | 0.23         |
| Reproductive status | 0.11                     | 0.61           | 0.13         |
| Combined gesture    | 0.40                     | 0.16           | <b>0.003</b> |
| Single gesture      | 0.19                     | 0.04           | 0.05         |

Table S8.6 Duration of receiving grooming ( $r^2 = 0.06$ )

|                     | Standardized coefficient | Standard error | <i>p</i>    |
|---------------------|--------------------------|----------------|-------------|
| Age                 | -0.11                    | 0.49           | 0.11        |
| Sex                 | 0.19                     | 0.49           | <b>0.02</b> |
| Kinship             | 0.00                     | 0.85           | 0.29        |
| Reproductive status | 0.07                     | 0.58           | 0.28        |
| Combined gesture    | 0.13                     | 0.15           | 0.11        |
| Single gesture      | 0.08                     | 0.04           | 0.18        |

Table S8.7 Duration of visual attention towards dyad partner ( $r^2 = 0.38$ )

|                     | Standardized coefficient | Standard error | <i>p</i>     |
|---------------------|--------------------------|----------------|--------------|
| Age                 | 0.05                     | 1.19           | 0.28         |
| Sex                 | 0.28                     | 1.26           | <b>0.002</b> |
| Kinship             | 0.21                     | 2.23           | <b>0.01</b>  |
| Reproductive status | 0.27                     | 1.65           | <b>0.01</b>  |
| Combined gesture    | 0.30                     | 0.30           | <b>0.002</b> |
| Single gesture      | 0.29                     | 0.09           | <b>0.004</b> |

Table S8.8 Duration of visual attention away from dyad partner ( $r^2 = 0.14$ )

|                     | Standardized coefficient | Standard error | <i>p</i>     |
|---------------------|--------------------------|----------------|--------------|
| Age                 | 0.341                    | 1.724          | <b>0.001</b> |
| Sex                 | -0.076                   | 1.319          | 0.215        |
| Kinship             | 0.075                    | 2.879          | 0.123        |
| Reproductive status | 0.026                    | 1.379          | 0.419        |
| Combined gesture    | -0.029                   | 0.422          | 0.385        |
| Single gesture      | 0.183                    | 0.112          | <b>0.045</b> |

Table S8.9 Duration of time in close proximity – within 2 m ( $r^2 = 0.28$ )

|                     | Standardized coefficient | Standard error | <i>p</i>     |
|---------------------|--------------------------|----------------|--------------|
| Age                 | 0.26                     | 2.24           | <b>0.003</b> |
| Sex                 | 0.10                     | 2.33           | 0.38         |
| Kinship             | 0.17                     | 4.09           | <b>0.05</b>  |
| Reproductive status | 0.14                     | 2.96           | 0.29         |
| Combined gesture    | 0.29                     | 0.16           | <b>0.01</b>  |
| Single gesture      | 0.15                     | 0.58           | 0.10         |

Table S8.10 Rate of scratch produced ( $r^2 = 0.179$ )

|                     | Standardized coefficient | Standard error | <i>p</i>       |
|---------------------|--------------------------|----------------|----------------|
| Age                 | -0.037                   | 0.596          | 0.33833        |
| Sex                 | 0.194                    | 0.530          | <b>0.03348</b> |
| Kinship             | 0.093                    | 1.110          | 0.14993        |
| Reproductive status | -0.014                   | 0.420          | 0.45027        |
| Combined gesture    | 0.155                    | 0.154          | 0.06747        |
| Single gesture      | 0.259                    | 0.039          | <b>0.01649</b> |

Table S8.11 Rate of scratch received ( $r^2 = 0.051$ )

|                     | Standardized coefficient | Standard error | <i>p</i>       |
|---------------------|--------------------------|----------------|----------------|
| Age                 | 0.03                     | 0.64           | 0.38431        |
| Sex                 | 0.21                     | 0.58           | <b>0.03248</b> |
| Kinship             | 0.08                     | 1.19           | 0.18541        |
| Reproductive status | 0.03                     | 0.44           | 0.33133        |
| Combined gesture    | 0.09                     | 0.16           | 0.18041        |
| Single gesture      | -0.14                    | 0.04           | 0.05497        |

### Mutual attention accompanying gestures

Supplementary Table S9. MRQAP regression models predicting durations of social behavior, per hour dyad spent within 10m. Predictor variables were rates of gestures with and without mutual attention between the recipient and the signaller, per hour dyad spent within 10m and demographic variables. Based on 132 chimpanzee dyads. Significant *p* values are indicated in bold. R squared ( $r^2$ ) denotes amount of variance in the dependent variable explained by the regression model.

Table S9.1 Duration of joint feeding behaviour ( $r^2 = 0.12$ )

|                                  | Standardized coefficient | Standard error | <i>p</i>     |
|----------------------------------|--------------------------|----------------|--------------|
| Age                              | -0.01                    | 0.68           | 0.48         |
| Sex                              | 0.31                     | 0.69           | <b>0.002</b> |
| Kinship                          | 0.29                     | 1.31           | <b>0.01</b>  |
| Reproductive status              | 0.21                     | 0.76           | 0.05         |
| Gesture with mutual attention    | 0.05                     | 0.06           | 0.26         |
| Gesture without mutual attention | -0.04                    | 0.08           | 0.38         |

Table S9.2 Duration of joint resting behaviour ( $r^2 = 0.08$ )

|         | Standardized coefficient | Standard error | <i>p</i>    |
|---------|--------------------------|----------------|-------------|
| Age     | 0.28                     | 1.41           | <b>0.01</b> |
| Sex     | -0.16                    | 1.32           | 0.10        |
| Kinship | -0.02                    | 2.41           | 0.44        |

|                                  |       |      |      |
|----------------------------------|-------|------|------|
| Reproductive status              | -0.05 | 1.50 | 0.35 |
| Gesture with mutual attention    | 0.004 | 0.16 | 0.37 |
| Gesture without mutual attention | 0.10  | 0.19 | 0.08 |

Table S9.3 Duration of joint travelling behaviour ( $r^2 = 0.28$ )

|                                  | Standardized coefficient | Standard error | <i>p</i>    |
|----------------------------------|--------------------------|----------------|-------------|
| Age                              | 0.23                     | 0.36           | <b>0.01</b> |
| Sex                              | -0.02                    | 0.32           | 0.40        |
| Kinship                          | 0.02                     | 0.60           | 0.29        |
| Reproductive status              | -0.03                    | 0.31           | 0.39        |
| Gesture with mutual attention    | 0.37                     | 0.04           | <b>0.01</b> |
| Gesture without mutual attention | 0.12                     | 0.04           | 0.07        |

Table S9.4 Duration of giving grooming ( $r^2 = 0.57$ )

|     | Standardized coefficient | Standard error | <i>p</i>    |
|-----|--------------------------|----------------|-------------|
| Age | 0.16                     | 0.39           | <b>0.01</b> |

|                                  |       |      |               |
|----------------------------------|-------|------|---------------|
| Sex                              | -0.01 | 0.39 | 0.45          |
| Kinship                          | 0.10  | 0.72 | 0.07          |
| Reproductive status              | 0.01  | 0.43 | 0.45          |
| Gesture with mutual attention    | -0.11 | 0.04 | <b>0.04</b>   |
| Gesture without mutual attention | 0.78  | 0.07 | <b>0.0005</b> |

Table S9.5 Duration of mutual grooming ( $r^2 = 0.42$ )

|                                  | Standardized coefficient | Standard error | <i>p</i>     |
|----------------------------------|--------------------------|----------------|--------------|
| Age                              | 0.14                     | 0.49           | 0.06         |
| Sex                              | -0.07                    | 0.49           | 0.41         |
| Kinship                          | 0.03                     | 0.94           | 0.68         |
| Reproductive status              | 0.08                     | 0.49           | 0.32         |
| Gesture with mutual attention    | 0.63                     | 0.07           | <b>0.001</b> |
| Gesture without mutual attention | -0.01                    | 0.06           | 0.78         |

Table S9.6 Duration of receiving grooming ( $r^2 = 0.07$ )

|  | Standardized | Standard error | <i>p</i> |
|--|--------------|----------------|----------|
|--|--------------|----------------|----------|



|                                  | coefficient |      |       |
|----------------------------------|-------------|------|-------|
| Age                              | -0.11       | 0.49 | 0.10  |
| Sex                              | 0.17        | 0.48 | 0.051 |
| Kinship                          | 0.00        | 0.86 | 0.67  |
| Reproductive status              | 0.06        | 0.55 | 0.30  |
| Gesture with mutual attention    | 0.21        | 0.06 | 0.054 |
| Gesture without mutual attention | 0.02        | 0.06 | 0.24  |

Table S9.7 Duration of visual attention towards dyad partner ( $r^2 = 0.49$ )

|                                  | Standardized coefficient | Standard error | <i>p</i>      |
|----------------------------------|--------------------------|----------------|---------------|
| Age                              | 0.06                     | 1.03           | 0.23          |
| Sex                              | 0.20                     | 1.07           | <b>0.01</b>   |
| Kinship                          | 0.19                     | 1.99           | <b>0.01</b>   |
| Reproductive status              | 0.22                     | 1.33           | <b>0.02</b>   |
| Gesture with mutual attention    | 0.56                     | 0.14           | <b>0.0005</b> |
| Gesture without mutual attention | 0.12                     | 0.13           | 0.07          |

Table S9.8 Duration of visual attention away from dyad partner ( $r^2 = 0.19$ )

|                                  | Standardized coefficient | Standard error | <i>p</i>     |
|----------------------------------|--------------------------|----------------|--------------|
| Age                              | 0.348                    | 1.662          | <b>0.001</b> |
| Sex                              | -0.094                   | 1.299          | 0.142        |
| Kinship                          | 0.068                    | 2.725          | 0.130        |
| Reproductive status              | 0.003                    | 1.329          | 0.494        |
| Gesture with mutual attention    | -0.032                   | 0.167          | 0.384        |
| Gesture without mutual attention | 0.288                    | 0.201          | <b>0.015</b> |

Table S9.9 Duration of time in close proximity – within 2 m ( $r^2 = 0.36$ )

|                                  | Standardized coefficient | Standard error | <i>p</i>     |
|----------------------------------|--------------------------|----------------|--------------|
| Age                              | 0.27                     | 2.10           | <b>0.002</b> |
| Sex                              | 0.03                     | 2.06           | 0.75         |
| Kinship                          | 0.15                     | 3.73           | <b>0.04</b>  |
| Reproductive status              | 0.10                     | 2.57           | 0.36         |
| Gesture with mutual attention    | 0.30                     | 0.24           | <b>0.01</b>  |
| Gesture without mutual attention | 0.26                     | 0.26           | <b>0.01</b>  |

Table S9.10 Rate of scratch produced ( $r^2 = 0.299$ )

|                                  | Standardized coefficient | Standard error | <i>p</i>     |
|----------------------------------|--------------------------|----------------|--------------|
| Age                              | -0.031                   | 0.540          | 0.36832      |
| Sex                              | 0.165                    | 0.488          | 0.05097      |
| Kinship                          | 0.086                    | 1.004          | 0.15242      |
| Reproductive status              | -0.033                   | 0.402          | 0.33983      |
| Gesture with mutual attention    | 0.527                    | 0.061          | <b>0.001</b> |
| Gesture without mutual attention | -0.026                   | 0.068          | 0.43028      |

Table S9.11 Rate of scratch received ( $r^2 = 0.058$ )

|                     | Standardized coefficient | Standard error | <i>p</i>       |
|---------------------|--------------------------|----------------|----------------|
| Age                 | 0.02                     | 0.64           | 0.4018         |
| Sex                 | 0.21                     | 0.56           | <b>0.03298</b> |
| Kinship             | 0.08                     | 1.15           | 0.17841        |
| Reproductive status | 0.04                     | 0.44           | 0.32184        |

|                                  |       |      |                |
|----------------------------------|-------|------|----------------|
| Gesture with mutual attention    | 0.05  | 0.06 | 0.24138        |
| Gesture without mutual attention | -0.13 | 0.08 | <b>0.04948</b> |

### **Bodily and manual gestures**

Supplementary Table S10. MRQAP regression models predicting durations of social behavior, per hour dyad spent within 10m. Predictor variables were rates of bodily and manual gestures between the recipient and the signaller, per hour dyad spent within 10m and demographic variables. Based on 132 chimpanzee dyads. Significant  $p$  values are indicated in bold. R squared ( $r^2$ ) denotes amount of variance in the dependent variable explained by the regression model.

Table S10.1 Duration of joint feeding behaviour ( $r^2 = 0.156$ )

|                     | Standardized coefficient | Standard error | $p$          |
|---------------------|--------------------------|----------------|--------------|
| Age                 | -0.043                   | 0.674          | 0.365        |
| Sex                 | 0.150                    | 0.581          | 0.083        |
| Kinship             | 0.285                    | 1.291          | <b>0.010</b> |
| Reproductive status | 0.259                    | 0.538          | <b>0.001</b> |
| Bodily              | 0.066                    | 0.041          | 0.237        |
| Manual              | -0.082                   | 0.088          | 0.201        |

Table S10.2 Duration of joint resting behaviour ( $r^2 = 0.072$ )

|                     | Standardized coefficient | Standard error | <i>p</i>     |
|---------------------|--------------------------|----------------|--------------|
| Age                 | 0.280                    | 1.405          | <b>0.004</b> |
| Sex                 | -0.116                   | 1.102          | 0.081        |
| Kinship             | -0.018                   | 2.383          | 0.463        |
| Reproductive status | -0.027                   | 1.113          | 0.405        |
| Bodily              | 0.060                    | 0.091          | 0.169        |
| Manual              | -0.014                   | 0.192          | 0.486        |

Table S10.3 Duration of joint travelling behaviour ( $r^2 = 0.294$ )

|                     | Standardized coefficient | Standard error | <i>p</i>     |
|---------------------|--------------------------|----------------|--------------|
| Age                 | 0.177                    | 0.345          | <b>0.027</b> |
| Sex                 | 0.034                    | 0.279          | 0.345        |
| Kinship             | 0.021                    | 0.619          | 0.286        |
| Reproductive status | -0.066                   | 0.252          | 0.191        |
| Bodily              | 0.503                    | 0.026          | <b>0.003</b> |
| Manual              | -0.062                   | 0.049          | 0.194        |

Table S10.4 Duration of giving grooming ( $r^2 = 0.291$ )

|                     | Standardized coefficient | Standard error | <i>p</i>     |
|---------------------|--------------------------|----------------|--------------|
| Age                 | 0.171                    | 0.498          | <b>0.025</b> |
| Sex                 | 0.045                    | 0.410          | 0.290        |
| Kinship             | 0.124                    | 0.919          | 0.078        |
| Reproductive status | 0.092                    | 0.405          | 0.124        |
| Bodily              | 0.220                    | 0.034          | <b>0.024</b> |
| Manual              | 0.293                    | 0.072          | <b>0.016</b> |

Table S10.5 Duration of mutual grooming ( $r^2 = 0.327$ )

|                     | Standardized coefficient | Standard error | <i>p</i>     |
|---------------------|--------------------------|----------------|--------------|
| Age                 | 0.073                    | 0.589          | 0.219        |
| Sex                 | -0.102                   | 0.494          | 0.132        |
| Kinship             | 0.031                    | 1.081          | 0.270        |
| Reproductive status | 0.097                    | 0.456          | 0.115        |
| Bodily              | 0.585                    | 0.043          | <b>0.001</b> |
| Manual              | -0.075                   | 0.077          | 0.149        |

Table S10.6 Duration of receiving grooming ( $r^2 = 0.087$ )

|                     | Standardized coefficient | Standard error | <i>p</i>     |
|---------------------|--------------------------|----------------|--------------|
| Age                 | -0.148                   | 0.516          | <b>0.046</b> |
| Sex                 | 0.123                    | 0.426          | 0.099        |
| Kinship             | 0.004                    | 0.886          | 0.350        |
| Reproductive status | 0.136                    | 0.423          | 0.054        |
| Bodily              | 0.255                    | 0.037          | <b>0.036</b> |
| Manual              | -0.092                   | 0.080          | 0.101        |

Table S10.7 Duration of visual attention towards dyad partner ( $r^2 = 0.421$ )

|                     | Standardized coefficient | Standard error | <i>p</i>     |
|---------------------|--------------------------|----------------|--------------|
| Age                 | -0.013                   | 1.188          | 0.452        |
| Sex                 | 0.070                    | 0.977          | 0.202        |
| Kinship             | 0.198                    | 2.219          | <b>0.011</b> |
| Reproductive status | 0.261                    | 1.183          | <b>0.005</b> |
| Bodily              | 0.549                    | 0.092          | <b>0.001</b> |
| Manual              | -0.024                   | 0.153          | 0.401        |

Table S10.8 Duration of visual attention away from dyad partner ( $r^2 = 0.144$ )

|                     | Standardized coefficient | Standard error | <i>p</i>     |
|---------------------|--------------------------|----------------|--------------|
| Age                 | 0.340                    | 1.771          | <b>0.002</b> |
| Sex                 | -0.069                   | 1.294          | 0.219        |
| Kinship             | 0.076                    | 2.905          | 0.126        |
| Reproductive status | 0.021                    | 1.307          | 0.431        |
| Bodily              | 0.139                    | 0.122          | 0.083        |
| Manual              | 0.028                    | 0.226          | 0.291        |

Table S10.9 Duration of time in close proximity – within 2 m ( $r^2 = 0.312$ )

|                     | Standardized coefficient | Standard error | <i>p</i>     |
|---------------------|--------------------------|----------------|--------------|
| Age                 | 0.226                    | 2.251          | <b>0.006</b> |
| Sex                 | -0.008                   | 1.713          | 0.462        |
| Kinship             | 0.164                    | 4.044          | <b>0.037</b> |
| Reproductive status | 0.163                    | 2.074          | 0.052        |
| Bodily              | 0.406                    | 0.164          | <b>0.003</b> |
| Manual              | 0.006                    | 0.311          | 0.421        |

Table S10.10 Rate of scratch produced ( $r^2 = 0.241$ )



|                     | Standardized coefficient | Standard error | <i>p</i>       |
|---------------------|--------------------------|----------------|----------------|
| Age                 | -0.098                   | 0.599          | 0.14443        |
| Sex                 | 0.189                    | 0.522          | <b>0.03448</b> |
| Kinship             | 0.088                    | 1.063          | 0.15442        |
| Reproductive status | -0.018                   | 0.394          | 0.4038         |
| Bodily              | 0.546                    | 0.041          | <b>0.0005</b>  |
| Manual              | -0.184                   | 0.079          | <b>0.01149</b> |

Table S10.11 Rate of scratch received ( $r^2 = 0.051$ )

|                     | Standardized coefficient | Standard error | <i>p</i>       |
|---------------------|--------------------------|----------------|----------------|
| Age                 | 0.02                     | 0.65           | 0.42129        |
| Sex                 | 0.20                     | 0.58           | <b>0.04248</b> |
| Kinship             | 0.08                     | 1.19           | 0.1994         |
| Reproductive status | 0.04                     | 0.45           | 0.33183        |
| Bodily              | -0.02                    | 0.04           | 0.47776        |
| Manual              | -0.06                    | 0.08           | 0.29685        |

### **Gesture events**

Supplementary Table S11. MRQAP regression models predicting durations of social behavior, per hour dyad spent within 10m. Predictor variable was rates of gesture events between the recipient and the signaller, per hour dyad spent within 10m and demographic variables. Based on 132 chimpanzee dyads. Significant  $p$  values are indicated in bold. R squared ( $r^2$ ) denotes amount of variance in the dependent variable explained by the regression model.

Table S11.1 Duration of joint feeding behaviour ( $r^2 = 0.151$ )

|                     | Standardized coefficient | Standard error | $p$          |
|---------------------|--------------------------|----------------|--------------|
| Age                 | -0.026                   | 0.656          | 0.417        |
| Sex                 | 0.149                    | 0.567          | 0.076        |
| Kinship             | 0.287                    | 1.236          | <b>0.008</b> |
| Reproductive status | 0.260                    | 0.563          | <b>0.003</b> |
| Events              | -0.008                   | 0.027          | 0.509        |

Table S11.2 Duration of joint resting behaviour ( $r^2 = 0.071$ )

|              | Standardized coefficient | Standard error | $p$          |
|--------------|--------------------------|----------------|--------------|
| Age          | 0.287                    | 1.397          | <b>0.005</b> |
| Sex          | -0.116                   | 1.070          | 0.066        |
| Kinship      | -0.018                   | 2.342          | 0.451        |
| Reproductive | -0.027                   | 1.122          | 0.427        |

|        |       |       |       |
|--------|-------|-------|-------|
| status |       |       |       |
| Events | 0.042 | 0.069 | 0.208 |

Table S11.3 Duration of joint travelling behaviour ( $r^2 = 0.240$ )

|                     | Standardized coefficient | Standard error | <i>p</i>     |
|---------------------|--------------------------|----------------|--------------|
| Age                 | 0.225                    | 0.366          | <b>0.017</b> |
| Sex                 | 0.035                    | 0.302          | 0.348        |
| Kinship             | 0.026                    | 0.622          | 0.252        |
| Reproductive status | -0.062                   | 0.268          | 0.219        |
| Events              | 0.396                    | 0.018          | <b>0.003</b> |

Table S11.4 Duration of giving grooming ( $r^2 = 0.293$ )

|                     | Standardized coefficient | Standard error | <i>p</i>     |
|---------------------|--------------------------|----------------|--------------|
| Age                 | 0.141                    | 0.484          | <b>0.047</b> |
| Sex                 | 0.046                    | 0.414          | 0.290        |
| Kinship             | 0.125                    | 0.886          | 0.064        |
| Reproductive status | 0.086                    | 0.389          | 0.128        |
| Events              | 0.467                    | 0.027          | <b>0.002</b> |

Table S11.5 Duration of mutual grooming ( $r^2 = 0.248$ )

|                     | Standardized coefficient | Standard error | <i>p</i>     |
|---------------------|--------------------------|----------------|--------------|
| Age                 | 0.130                    | 0.618          | 0.105        |
| Sex                 | -0.101                   | 0.524          | 0.150        |
| Kinship             | 0.035                    | 1.110          | 0.241        |
| Reproductive status | 0.103                    | 0.508          | 0.139        |
| Events              | 0.451                    | 0.031          | <b>0.003</b> |

Table S11.6 Duration of receiving grooming ( $r^2 = 0.071$ )

|                     | Standardized coefficient | Standard error | <i>p</i> |
|---------------------|--------------------------|----------------|----------|
| Age                 | -0.117                   | 0.483          | 0.086    |
| Sex                 | 0.123                    | 0.404          | 0.092    |
| Kinship             | 0.007                    | 0.876          | 0.315    |
| Reproductive status | 0.137                    | 0.450          | 0.056    |
| Events              | 0.164                    | 0.025          | 0.065    |

Table S11.7 Duration of visual attention towards dyad partner ( $r^2 = 0.369$ )

|                     | Standardized coefficient | Standard error | <i>p</i>     |
|---------------------|--------------------------|----------------|--------------|
| Age                 | 0.032                    | 1.226          | 0.344        |
| Sex                 | 0.071                    | 0.973          | 0.197        |
| Kinship             | 0.202                    | 2.239          | <b>0.009</b> |
| Reproductive status | 0.265                    | 1.266          | <b>0.003</b> |
| Events              | 0.474                    | 0.067          | <b>0.001</b> |

Table S11.8 Duration of visual attention away from dyad partner ( $r^2 = 0.143$ )

|                     | Standardized coefficient | Standard error | <i>p</i>     |
|---------------------|--------------------------|----------------|--------------|
| Age                 | 0.346                    | 1.708          | <b>0.002</b> |
| Sex                 | -0.068                   | 1.267          | 0.232        |
| Kinship             | 0.077                    | 2.752          | 0.095        |
| Reproductive status | 0.021                    | 1.362          | 0.430        |
| Events              | 0.152                    | 0.078          | <b>0.049</b> |

Table S11.9 Duration of time in close proximity – within 2 m ( $r^2 = 0.288$ )

|  | Standardized coefficient | Standard error | <i>p</i> |
|--|--------------------------|----------------|----------|
|--|--------------------------|----------------|----------|

|                     |        |       |              |
|---------------------|--------|-------|--------------|
| Age                 | 0.256  | 2.271 | <b>0.005</b> |
| Sex                 | -0.007 | 1.668 | 0.472        |
| Kinship             | 0.168  | 3.990 | <b>0.027</b> |
| Reproductive status | 0.165  | 2.197 | 0.057        |
| Events              | 0.373  | 0.122 | <b>0.003</b> |

Table S11.10 Rate of scratch produced ( $r^2 = 0.172$ )

|                     | Standardized coefficient | Standard error | <i>p</i>       |
|---------------------|--------------------------|----------------|----------------|
| Age                 | -0.033                   | 0.585          | 0.37281        |
| Sex                 | 0.189                    | 0.528          | <b>0.03598</b> |
| Kinship             | 0.094                    | 1.106          | 0.15692        |
| Reproductive status | -0.016                   | 0.432          | 0.43478        |
| Events              | 0.364                    | 0.027          | <b>0.003</b>   |

Table S11.11 Rate of scratch received ( $r^2 = 0.051$ )

|     | Standardized coefficient | Standard error | <i>p</i> |
|-----|--------------------------|----------------|----------|
| Age | 0.03                     | 0.62           | 0.38731  |

|                     |       |      |                |
|---------------------|-------|------|----------------|
| Sex                 | 0.20  | 0.55 | <b>0.03998</b> |
| Kinship             | 0.08  | 1.14 | 0.1929         |
| Reproductive status | 0.04  | 0.46 | 0.33183        |
| Events              | -0.07 | 0.03 | 0.1909         |

### Non-indicative and indicative gestures

Supplementary Table S12. MRQAP regression models predicting durations of social behavior, per hour dyad spent within 10m. Predictor variables were rates of non-indicative and indicative gestures between the recipient and the signaller, per hour dyad spent within 10m and demographic variables. Based on 132 chimpanzee dyads. Significant  $p$  values are indicated in bold. R squared ( $r^2$ ) denotes amount of variance in the dependent variable explained by the regression model.

Table S12.1 Duration of joint feeding behaviour ( $r^2 = 0.162$ )

|                     | Standardized coefficient | Standard error | $p$          |
|---------------------|--------------------------|----------------|--------------|
| Age                 | -0.044                   | 0.652          | 0.348        |
| Sex                 | 0.153                    | 0.560          | 0.067        |
| Kinship             | 0.283                    | 1.263          | <b>0.008</b> |
| Reproductive status | 0.251                    | 0.554          | <b>0.005</b> |
| Manual indicative   | 0.095                    | 0.406          | 0.115        |
| Manual non-         | -0.081                   | 0.075          | 0.113        |

|            |  |  |  |
|------------|--|--|--|
| indicative |  |  |  |
|------------|--|--|--|

Table S12.2 Duration of joint resting behaviour ( $r^2 = 0.072$ )

|                       | Standardized coefficient | Standard error | <i>p</i>     |
|-----------------------|--------------------------|----------------|--------------|
| Age                   | 0.287                    | 1.414          | <b>0.005</b> |
| Sex                   | -0.114                   | 1.123          | 0.086        |
| Kinship               | -0.020                   | 2.471          | 0.445        |
| Reproductive status   | -0.028                   | 1.123          | 0.427        |
| Manual indicative     | 0.046                    | 1.028          | 0.161        |
| Manual non-indicative | 0.000                    | 0.182          | 0.622        |

Table S12.3 Duration of joint travelling behaviour ( $r^2 = 0.280$ )

|                     | Standardized coefficient | Standard error | <i>p</i>     |
|---------------------|--------------------------|----------------|--------------|
| Age                 | 0.226                    | 0.356          | <b>0.011</b> |
| Sex                 | 0.052                    | 0.279          | 0.275        |
| Kinship             | 0.011                    | 0.600          | 0.287        |
| Reproductive status | -0.076                   | 0.259          | 0.177        |



|                       |       |       |              |
|-----------------------|-------|-------|--------------|
| Manual indicative     | 0.429 | 0.281 | <b>0.011</b> |
| Manual non-indicative | 0.041 | 0.046 | 0.150        |

Table S12.4 Duration of giving grooming ( $r^2 = 0.275$ )

|                       | Standardized coefficient | Standard error | <i>p</i>     |
|-----------------------|--------------------------|----------------|--------------|
| Age                   | 0.203                    | 0.496          | <b>0.011</b> |
| Sex                   | 0.051                    | 0.405          | 0.269        |
| Kinship               | 0.122                    | 0.938          | 0.080        |
| Reproductive status   | 0.096                    | 0.405          | 0.129        |
| Manual indicative     | 0.173                    | 0.365          | <b>0.036</b> |
| Manual non-indicative | 0.354                    | 0.066          | <b>0.014</b> |

Table S12.5 Duration of mutual grooming ( $r^2 = 0.362$ )

|     | Standardized coefficient | Standard error | <i>p</i> |
|-----|--------------------------|----------------|----------|
| Age | 0.120                    | 0.556          | 0.094    |
| Sex | -0.079                   | 0.470          | 0.186    |

|                       |       |       |              |
|-----------------------|-------|-------|--------------|
| Kinship               | 0.018 | 1.031 | 0.260        |
| Reproductive status   | 0.079 | 0.452 | 0.179        |
| Manual indicative     | 0.561 | 0.459 | <b>0.001</b> |
| Manual non-indicative | 0.016 | 0.068 | 0.246        |

Table S12.6 Duration of receiving grooming ( $r^2 = 0.071$ )

|                       | Standardized coefficient | Standard error | <i>p</i>     |
|-----------------------|--------------------------|----------------|--------------|
| Age                   | -0.118                   | 0.483          | 0.089        |
| Sex                   | 0.132                    | 0.414          | 0.084        |
| Kinship               | 0.000                    | 0.807          | 0.685        |
| Reproductive status   | 0.135                    | 0.436          | 0.060        |
| Manual indicative     | 0.170                    | 0.382          | <b>0.046</b> |
| Manual non-indicative | -0.019                   | 0.070          | 0.541        |

Table S12.7 Duration of visual attention towards dyad partner ( $r^2 = 0.463$ )

|  | Standardized | Standard error | <i>p</i> |
|--|--------------|----------------|----------|
|--|--------------|----------------|----------|

|                       | coefficient |       |              |
|-----------------------|-------------|-------|--------------|
| Age                   | 0.029       | 1.052 | 0.342        |
| Sex                   | 0.092       | 0.851 | 0.098        |
| Kinship               | 0.185       | 2.029 | <b>0.013</b> |
| Reproductive status   | 0.243       | 1.134 | <b>0.002</b> |
| Manual indicative     | 0.545       | 0.946 | <b>0.001</b> |
| Manual non-indicative | 0.057       | 0.139 | 0.171        |

Table S12.8 Duration of visual attention away from dyad partner ( $r^2 = 0.137$ )

|                       | Standardized coefficient | Standard error | <i>p</i>     |
|-----------------------|--------------------------|----------------|--------------|
| Age                   | 0.359                    | 1.719          | <b>0.001</b> |
| Sex                   | -0.065                   | 1.277          | 0.249        |
| Kinship               | 0.074                    | 2.902          | 0.134        |
| Reproductive status   | 0.023                    | 1.329          | 0.405        |
| Manual indicative     | 0.089                    | 1.115          | 0.112        |
| Manual non-indicative | 0.071                    | 0.213          | 0.120        |

Table S12.9 Duration of time in close proximity – within 2 m ( $r^2 = 0.312$ )

|                       | Standardized coefficient | Standard error | <i>p</i>     |
|-----------------------|--------------------------|----------------|--------------|
| Age                   | 0.263                    | 2.228          | <b>0.003</b> |
| Sex                   | 0.008                    | 1.660          | 0.454        |
| Kinship               | 0.156                    | 3.667          | <b>0.026</b> |
| Reproductive status   | 0.154                    | 1.997          | 0.062        |
| Manual indicative     | 0.370                    | 1.763          | <b>0.007</b> |
| Manual non-indicative | 0.081                    | 0.295          | 0.144        |

Table S12.10 Rate of scratch produced ( $r^2 = 0.193$ )

|                     | Standardized coefficient | Standard error | <i>p</i>       |
|---------------------|--------------------------|----------------|----------------|
| Age                 | -0.039                   | 0.574          | 0.34783        |
| Sex                 | 0.208                    | 0.544          | <b>0.03148</b> |
| Kinship             | 0.077                    | 1.105          | 0.18441        |
| Reproductive status | -0.024                   | 0.392          | 0.3938         |

|                       |        |       |              |
|-----------------------|--------|-------|--------------|
| Manual indicative     | 0.402  | 0.430 | <b>0.003</b> |
| Manual non-indicative | -0.047 | 0.070 | 0.32234      |

Table S12.11 Rate of scratch received ( $r^2 = 0.051$ )

|                       | Standardized coefficient | Standard error | <i>p</i>       |
|-----------------------|--------------------------|----------------|----------------|
| Age                   | 0.01                     | 0.60           | 0.44328        |
| Sex                   | 0.20                     | 0.55           | <b>0.03998</b> |
| Kinship               | 0.08                     | 1.13           | 0.17741        |
| Reproductive status   | 0.03                     | 0.44           | 0.34133        |
| Manual indicative     | 0.01                     | 0.41           | 0.4023         |
| Manual non-indicative | -0.07                    | 0.08           | 0.17191        |

**Gestures made at close and far proximity**

Supplementary Table S13. MRQAP regression models predicting durations of social behavior, per hour dyad spent within 10m. Predictor variables were rates of gestures made at close and far proximity between the recipient and the signaller, per hour dyad spent within 10m and demographic variables. Based on 132 chimpanzee dyads. Significant *p* values are indicated in bold. R squared ( $r^2$ ) denotes amount of variance in the dependent variable explained by the regression model.

Table S13.1 Duration of joint feeding behaviour ( $r^2 = 0.156$ )

|                     | Standardized coefficient | Standard error | <i>p</i>     |
|---------------------|--------------------------|----------------|--------------|
| Age                 | -0.026                   | 0.641          | 0.409        |
| Sex                 | 0.142                    | 0.576          | 0.092        |
| Kinship             | 0.282                    | 1.250          | <b>0.006</b> |
| Reproductive status | 0.251                    | 0.557          | <b>0.003</b> |
| Close proximity     | 0.055                    | 0.053          | 0.223        |
| Far proximity       | -0.065                   | 0.044          | 0.203        |

Table S13.2 Duration of joint resting behaviour ( $r^2 = 0.082$ )

|                     | Standardized coefficient | Standard error | <i>p</i>     |
|---------------------|--------------------------|----------------|--------------|
| Age                 | 0.284                    | 1.421          | <b>0.005</b> |
| Sex                 | -0.131                   | 1.125          | 0.055        |
| Kinship             | -0.025                   | 2.482          | 0.423        |
| Reproductive status | -0.040                   | 1.124          | 0.365        |
| Close proximity     | 0.121                    | 0.123          | <b>0.046</b> |
| Far proximity       | -0.048                   | 0.112          | 0.235        |

Table S13.3 Duration of joint travelling behaviour ( $r^2 = 0.241$ )

|                     | Standardized coefficient | Standard error | <i>p</i>     |
|---------------------|--------------------------|----------------|--------------|
| Age                 | 0.225                    | 0.360          | <b>0.009</b> |
| Sex                 | 0.013                    | 0.309          | 0.445        |
| Kinship             | 0.016                    | 0.660          | 0.314        |
| Reproductive status | -0.059                   | 0.275          | 0.248        |
| Close proximity     | 0.273                    | 0.030          | <b>0.015</b> |
| Far proximity       | 0.223                    | 0.026          | <b>0.013</b> |

Table S13.4 Duration of giving grooming ( $r^2 = 0.589$ )

|                     | Standardized coefficient | Standard error | <i>p</i>     |
|---------------------|--------------------------|----------------|--------------|
| Age                 | 0.128                    | 0.346          | <b>0.018</b> |
| Sex                 | -0.042                   | 0.282          | 0.242        |
| Kinship             | 0.085                    | 0.625          | 0.068        |
| Reproductive status | 0.022                    | 0.274          | 0.383        |
| Close proximity     | 0.765                    | 0.055          | <b>0.001</b> |
| Far proximity       | -0.112                   | 0.029          | <b>0.012</b> |

Table S13.5 Duration of mutual grooming ( $r^2 = 0.288$ )

|                     | Standardized coefficient | Standard error | <i>p</i>     |
|---------------------|--------------------------|----------------|--------------|
| Age                 | 0.125                    | 0.604          | 0.101        |
| Sex                 | -0.136                   | 0.518          | 0.073        |
| Kinship             | 0.022                    | 1.067          | 0.263        |
| Reproductive status | 0.095                    | 0.499          | 0.157        |
| Close proximity     | 0.387                    | 0.052          | <b>0.004</b> |
| Far proximity       | 0.223                    | 0.044          | <b>0.018</b> |

Table S13.6 Duration of receiving grooming ( $r^2 = 0.074$ )

|                     | Standardized coefficient | Standard error | <i>p</i> |
|---------------------|--------------------------|----------------|----------|
| Age                 | -0.117                   | 0.495          | 0.099    |
| Sex                 | 0.109                    | 0.400          | 0.128    |
| Kinship             | 0.001                    | 0.897          | 0.352    |
| Reproductive status | 0.132                    | 0.437          | 0.069    |
| Close proximity     | 0.153                    | 0.044          | 0.083    |
| Far proximity       | 0.053                    | 0.039          | 0.167    |

Table S13.7 Duration of visual attention towards dyad partner ( $r^2 = 0.439$ )



|                     | Standardized coefficient | Standard error | <i>p</i>     |
|---------------------|--------------------------|----------------|--------------|
| Age                 | 0.026                    | 1.152          | 0.368        |
| Sex                 | 0.020                    | 0.935          | 0.386        |
| Kinship             | 0.181                    | 2.133          | <b>0.009</b> |
| Reproductive status | 0.242                    | 1.179          | <b>0.010</b> |
| Close proximity     | 0.500                    | 0.119          | <b>0.001</b> |
| Far proximity       | 0.131                    | 0.086          | <b>0.045</b> |

Table S13.8 Duration of visual attention away from dyad partner ( $r^2 = 0.190$ )

|                     | Standardized coefficient | Standard error | <i>p</i>     |
|---------------------|--------------------------|----------------|--------------|
| Age                 | 0.341                    | 1.683          | <b>0.001</b> |
| Sex                 | -0.102                   | 1.258          | 0.105        |
| Kinship             | 0.062                    | 2.737          | 0.144        |
| Reproductive status | -0.005                   | 1.292          | 0.481        |
| Close proximity     | 0.287                    | 0.147          | <b>0.021</b> |
| Far proximity       | -0.066                   | 0.116          | 0.158        |

Table S13.9 Duration of time in close proximity – within 2 m ( $r^2 = 0.376$ )

|                     | Standardized coefficient | Standard error | <i>p</i>     |
|---------------------|--------------------------|----------------|--------------|
| Age                 | 0.249                    | 2.163          | <b>0.004</b> |
| Sex                 | -0.058                   | 1.643          | 0.226        |
| Kinship             | 0.145                    | 3.680          | <b>0.035</b> |
| Reproductive status | 0.134                    | 2.103          | 0.094        |
| Close proximity     | 0.480                    | 0.213          | <b>0.001</b> |
| Far proximity       | 0.029                    | 0.155          | 0.297        |

Table S13.10 Rate of scratch produced ( $r^2 = 0.174$ )

|                     | Standardized coefficient | Standard error | <i>p</i>       |
|---------------------|--------------------------|----------------|----------------|
| Age                 | -0.032                   | 0.582          | 0.3903         |
| Sex                 | 0.175                    | 0.539          | 0.05697        |
| Kinship             | 0.089                    | 1.120          | 0.15192        |
| Reproductive status | -0.007                   | 0.445          | 0.47126        |
| Close proximity     | 0.210                    | 0.051          | <b>0.02399</b> |
| Far proximity       | 0.244                    | 0.045          | <b>0.01299</b> |

Table S13.11 Rate of scratch received ( $r^2 = 0.058$ )

|                     | Standardized coefficient | Standard error | <i>p</i>       |
|---------------------|--------------------------|----------------|----------------|
| Age                 | 0.03                     | 0.66           | 0.3908         |
| Sex                 | 0.22                     | 0.58           | <b>0.03598</b> |
| Kinship             | 0.08                     | 1.19           | 0.18691        |
| Reproductive status | 0.05                     | 0.45           | 0.27236        |
| Close proximity     | -0.11                    | 0.05           | <b>0.04898</b> |
| Far proximity       | 0.01                     | 0.05           | 0.38131        |

#### **Non-repetitive and repetitive gestures**

Supplementary Table S14. MRQAP regression models predicting durations of social behavior, per hour dyad spent within 10m. Predictor variables were rates of non-repetitive and repetitive gestures between the recipient and the signaller, per hour dyad spent within 10m and demographic variables. Based on 132 chimpanzee dyads. Significant *p* values are indicated in bold. R squared ( $r^2$ ) denotes amount of variance in the dependent variable explained by the regression model.

Table S14.1 Duration of joint feeding behaviour ( $r^2 = 0.158$ )

|         | Standardized coefficient | Standard error | <i>p</i>     |
|---------|--------------------------|----------------|--------------|
| Age     | -0.029                   | 0.658          | 0.410        |
| Sex     | 0.144                    | 0.562          | 0.085        |
| Kinship | 0.291                    | 1.288          | <b>0.009</b> |

|                     |        |       |              |
|---------------------|--------|-------|--------------|
| Reproductive status | 0.262  | 0.565 | <b>0.002</b> |
| Non-repetitive      | -0.071 | 0.047 | 0.192        |
| Repetitive          | 0.090  | 0.051 | 0.158        |

Table S14.2 Duration of joint resting behaviour ( $r^2 = 0.072$ )

|                     | Standardized coefficient | Standard error | <i>p</i>     |
|---------------------|--------------------------|----------------|--------------|
| Age                 | 0.286                    | 1.419          | <b>0.005</b> |
| Sex                 | -0.116                   | 1.101          | 0.064        |
| Kinship             | -0.019                   | 2.464          | 0.459        |
| Reproductive status | -0.027                   | 1.120          | 0.415        |
| Non-repetitive      | 0.028                    | 0.102          | 0.245        |
| Repetitive          | 0.021                    | 0.126          | 0.259        |

Table S14.3 Duration of joint travelling behaviour ( $r^2 = 0.353$ )

|         | Standardized coefficient | Standard error | <i>p</i>     |
|---------|--------------------------|----------------|--------------|
| Age     | 0.222                    | 0.309          | <b>0.004</b> |
| Sex     | 0.054                    | 0.250          | 0.234        |
| Kinship | 0.002                    | 0.551          | 0.391        |

|                     |        |       |              |
|---------------------|--------|-------|--------------|
| Reproductive status | -0.080 | 0.215 | 0.138        |
| Non-repetitive      | 0.559  | 0.028 | <b>0.006</b> |
| Repetitive          | -0.092 | 0.028 | 0.065        |

Table S14.4 Duration of giving grooming ( $r^2 = 0.409$ )

|                     | Standardized coefficient | Standard error | <i>p</i>     |
|---------------------|--------------------------|----------------|--------------|
| Age                 | 0.138                    | 0.431          | <b>0.030</b> |
| Sex                 | 0.028                    | 0.355          | 0.343        |
| Kinship             | 0.129                    | 0.770          | <b>0.035</b> |
| Reproductive status | 0.106                    | 0.358          | 0.070        |
| Non-repetitive      | -0.061                   | 0.035          | 0.115        |
| Repetitive          | 0.606                    | 0.047          | <b>0.001</b> |

Table S14.5 Duration of mutual grooming ( $r^2 = 0.470$ )

|         | Standardized coefficient | Standard error | <i>p</i> |
|---------|--------------------------|----------------|----------|
| Age     | 0.126                    | 0.509          | 0.059    |
| Sex     | -0.074                   | 0.420          | 0.186    |
| Kinship | 0.005                    | 0.917          | 0.371    |

|                     |        |       |              |
|---------------------|--------|-------|--------------|
| Reproductive status | 0.077  | 0.424 | 0.181        |
| Non-repetitive      | 0.726  | 0.052 | <b>0.001</b> |
| Repetitive          | -0.189 | 0.045 | <b>0.004</b> |

Table S14.6 Duration of receiving grooming ( $r^2 = 0.080$ )

|                     | Standardized coefficient | Standard error | <i>p</i>     |
|---------------------|--------------------------|----------------|--------------|
| Age                 | -0.115                   | 0.503          | 0.094        |
| Sex                 | 0.131                    | 0.424          | 0.088        |
| Kinship             | -0.002                   | 0.858          | 0.654        |
| Reproductive status | 0.133                    | 0.436          | 0.065        |
| Non-repetitive      | 0.207                    | 0.039          | <b>0.035</b> |
| Repetitive          | -0.040                   | 0.045          | 0.424        |

Table S14.7 Duration of visual attention towards dyad partner ( $r^2 = 0.464$ )

|         | Standardized coefficient | Standard error | <i>p</i>     |
|---------|--------------------------|----------------|--------------|
| Age     | 0.028                    | 1.143          | 0.376        |
| Sex     | 0.088                    | 0.950          | 0.141        |
| Kinship | 0.179                    | 2.173          | <b>0.032</b> |

|                     |        |       |              |
|---------------------|--------|-------|--------------|
| Reproductive status | 0.249  | 1.127 | <b>0.002</b> |
| Non-repetitive      | 0.567  | 0.104 | <b>0.004</b> |
| Repetitive          | -0.003 | 0.090 | 0.543        |

Table S14.8 Duration of visual attention away from dyad partner ( $r^2 = 0.149$ )

|                     | Standardized coefficient | Standard error | <i>p</i>     |
|---------------------|--------------------------|----------------|--------------|
| Age                 | 0.345                    | 1.731          | <b>0.001</b> |
| Sex                 | 0.345                    | 1.731          | <b>0.001</b> |
| Kinship             | -0.072                   | 1.307          | 0.219        |
| Reproductive status | 0.077                    | 2.732          | 0.107        |
| Non-repetitive      | 0.026                    | 1.363          | 0.414        |
| Repetitive          | 0.015                    | 0.127          | 0.352        |

Table S14.9 Duration of time in close proximity – within 2 m ( $r^2 = 0.307$ )

|         | Standardized coefficient | Standard error | <i>p</i>     |
|---------|--------------------------|----------------|--------------|
| Age     | 0.253                    | 2.241          | <b>0.004</b> |
| Sex     | 0.000                    | 1.681          | 0.483        |
| Kinship | 0.154                    | 3.809          | <b>0.033</b> |

|                     |       |       |              |
|---------------------|-------|-------|--------------|
| Reproductive status | 0.159 | 2.109 | 0.067        |
| Non-repetitive      | 0.331 | 0.177 | <b>0.012</b> |
| Repetitive          | 0.111 | 0.193 | 0.118        |

Table S14.10 Rate of scratch produced ( $r^2 = 0.215$ )

|                     | Standardized coefficient | Standard error | <i>p</i>       |
|---------------------|--------------------------|----------------|----------------|
| Age                 | -0.0346                  | 0.5810         | 0.37881        |
| Sex                 | 0.2024                   | 0.5279         | <b>0.03248</b> |
| Kinship             | 0.0765                   | 1.1127         | 0.1919         |
| Reproductive status | -0.0259                  | 0.4175         | 0.38731        |
| Non-repetitive      | 0.4196                   | 0.0419         | <b>0.0045</b>  |
| Repetitive          | -0.0013                  | 0.0470         | 0.55822        |

Table S14.11 Rate of scratch received ( $r^2 = 0.060$ )

|     | Standardized coefficient | Standard error | <i>p</i>       |
|-----|--------------------------|----------------|----------------|
| Age | 0.03                     | 0.63           | 0.38731        |
| Sex | 0.21                     | 0.54           | <b>0.02499</b> |



|                     |       |      |                |
|---------------------|-------|------|----------------|
| Kinship             | 0.07  | 1.19 | 0.1959         |
| Reproductive status | 0.03  | 0.45 | 0.34633        |
| Non-repetitive      | 0.05  | 0.05 | 0.22239        |
| Repetitive          | -0.14 | 0.05 | <b>0.04498</b> |

### Heterogeneous and homogeneous gestures

Supplementary Table S15. MRQAP regression models predicting durations of social behavior, per hour dyad spent within 10m. Predictor variables were rates of heterogeneous and homogeneous gestures between the recipient and the signaller, per hour dyad spent within 10m and demographic variables. Based on 132 chimpanzee dyads. Significant *p* values are indicated in bold. R squared ( $r^2$ ) denotes amount of variance in the dependent variable explained by the regression model.

Table S15.1 Duration of joint feeding behaviour ( $r^2 = 0.$ )

|                     | Standardized coefficient | Standard error | <i>p</i>       |
|---------------------|--------------------------|----------------|----------------|
| Age                 | -0.02                    | 0.66           | 0.41629        |
| Sex                 | 0.15                     | 0.58           | 0.08346        |
| Kinship             | 0.29                     | 1.29           | <b>0.01199</b> |
| Reproductive status | 0.26                     | 0.55           | <b>0.002</b>   |
| Heterogeneous       | 0.00                     | 0.08           | 0.43328        |
| Homogeneous         | -0.01                    | 0.04           | 0.53173        |

Table S15.2 Duration of joint resting behaviour ( $r^2 = 0.075$ )

|                     | Standardized coefficient | Standard error | <i>p</i>      |
|---------------------|--------------------------|----------------|---------------|
| Age                 | 0.27                     | 1.44           | <b>0.0085</b> |
| Sex                 | -0.12                    | 1.14           | 0.08496       |
| Kinship             | -0.02                    | 2.40           | 0.44878       |
| Reproductive status | -0.03                    | 1.12           | 0.3958        |
| Heterogeneous       | -0.02                    | 0.20           | 0.47076       |
| Homogeneous         | 0.08                     | 0.11           | 0.10895       |

Table S15.3 Duration of joint travelling behaviour ( $r^2 = 0.251$ )

|                     | Standardized coefficient | Standard error | <i>p</i>       |
|---------------------|--------------------------|----------------|----------------|
| Age                 | 0.17                     | 0.36           | <b>0.04048</b> |
| Sex                 | 0.01                     | 0.29           | 0.44428        |
| Kinship             | 0.01                     | 0.60           | 0.33633        |
| Reproductive status | -0.07                    | 0.27           | 0.2019         |
| Heterogeneous       | -0.03                    | 0.05           | 0.38281        |
| Homogeneous         | 0.43                     | 0.03           | <b>0.01049</b> |

Table S15.4 Duration of giving grooming ( $r^2 = 0.364$ )

|                     | Standardized coefficient | Standard error | <i>p</i>     |
|---------------------|--------------------------|----------------|--------------|
| Age                 | 0.09                     | 0.47           | 0.12944      |
| Sex                 | 0.02                     | 0.39           | 0.3953       |
| Kinship             | 0.11                     | 0.84           | 0.06697      |
| Reproductive status | 0.08                     | 0.37           | 0.14543      |
| Heterogeneous       | 0.11                     | 0.07           | 0.06747      |
| Homogeneous         | 0.52                     | 0.04           | <b>0.004</b> |

Table S15.5 Duration of mutual grooming ( $r^2 = 0.358$ )

|                     | Standardized coefficient | Standard error | <i>p</i>       |
|---------------------|--------------------------|----------------|----------------|
| Age                 | 0.03                     | 0.56           | 0.34533        |
| Sex                 | -0.14                    | 0.49           | 0.08046        |
| Kinship             | 0.01                     | 1.05           | 0.33633        |
| Reproductive status | 0.08                     | 0.46           | 0.16392        |
| Heterogeneous       | -0.15                    | 0.08           | <b>0.01649</b> |
| Homogeneous         | 0.60                     | 0.05           | <b>0.0005</b>  |

Table S15.6 Duration of receiving grooming ( $r^2 = 0.072$ )

|                     | Standardized coefficient | Standard error | <i>p</i>       |
|---------------------|--------------------------|----------------|----------------|
| Age                 | -0.14                    | 0.51           | 0.05697        |
| Sex                 | 0.11                     | 0.42           | 0.12544        |
| Kinship             | 0.00                     | 0.89           | 0.37831        |
| Reproductive status | 0.14                     | 0.44           | 0.05697        |
| Heterogeneous       | -0.01                    | 0.08           | 0.62919        |
| Homogeneous         | 0.17                     | 0.04           | <b>0.04898</b> |

Table S15.7 Duration of visual attention towards dyad partner ( $r^2 = 0.455$ )

|                     | Standardized coefficient | Standard error | <i>p</i>       |
|---------------------|--------------------------|----------------|----------------|
| Age                 | -0.05                    | 1.19           | 0.23888        |
| Sex                 | 0.04                     | 0.98           | 0.31434        |
| Kinship             | 0.18                     | 2.21           | <b>0.01699</b> |
| Reproductive status | 0.25                     | 1.16           | <b>0.0035</b>  |
| Heterogeneous       | -0.09                    | 0.15           | <b>0.04698</b> |
| Homogeneous         | 0.60                     | 0.10           | <b>0.001</b>   |

Table S15.8 Duration of visual attention away from dyad partner ( $r^2 = 0.151$ )

|                     | Standardized coefficient | Standard error | <i>p</i>       |
|---------------------|--------------------------|----------------|----------------|
| Age                 | 0.33                     | 1.77           | <b>0.0035</b>  |
| Sex                 | -0.08                    | 1.31           | 0.1924         |
| Kinship             | 0.07                     | 2.85           | 0.13793        |
| Reproductive status | 0.02                     | 1.32           | 0.44478        |
| Heterogeneous       | 0.04                     | 0.23           | 0.21289        |
| Homogeneous         | 0.17                     | 0.12           | <b>0.04348</b> |

Table S15.9 Duration of time in close proximity – within 2 m ( $r^2 = 0.335$ )

|                     | Standardized coefficient | Standard error | <i>p</i>       |
|---------------------|--------------------------|----------------|----------------|
| Age                 | 0.20                     | 2.25           | <b>0.01899</b> |
| Sex                 | -0.03                    | 1.67           | 0.35082        |
| Kinship             | 0.15                     | 3.93           | <b>0.03798</b> |
| Reproductive status | 0.15                     | 2.08           | 0.06597        |
| Heterogeneous       | -0.03                    | 0.30           | 0.4013         |
| Homogeneous         | 0.45                     | 0.18           | <b>0.0005</b>  |

Table S15.10 Rate of scratch produced ( $r^2 = 0.186$ )

|                     | Standardized coefficient | Standard error | <i>p</i>      |
|---------------------|--------------------------|----------------|---------------|
| Age                 | -0.067                   | 0.603          | 0.25437       |
| Sex                 | 0.169                    | 0.540          | 0.07046       |
| Kinship             | 0.083                    | 1.099          | 0.17341       |
| Reproductive status | -0.019                   | 0.436          | 0.42579       |
| Heterogeneous       | 0.053                    | 0.077          | 0.21939       |
| Homogeneous         | 0.378                    | 0.042          | <b>0.0025</b> |

Table S15.11 Rate of scratch received ( $r^2 = 0.054$ )

|                     | Standardized coefficient | Standard error | <i>p</i>       |
|---------------------|--------------------------|----------------|----------------|
| Age                 | 0.03                     | 0.65           | 0.36182        |
| Sex                 | 0.21                     | 0.57           | <b>0.03748</b> |
| Kinship             | 0.08                     | 1.19           | 0.17141        |
| Reproductive status | 0.04                     | 0.45           | 0.29985        |
| Heterogeneous       | -0.03                    | 0.09           | 0.4008         |

|             |       |      |         |
|-------------|-------|------|---------|
| Homogeneous | -0.08 | 0.04 | 0.16142 |
|-------------|-------|------|---------|

### Gestures accompanied by penile erection

Supplementary Table S16. MRQAP regression models predicting durations of social behavior, per hour dyad spent within 10m. Predictor variables were rates of gestures between the recipient and the signaller are accompanied by penile erection, per hour dyad spent within 10m and demographic variables. Based on 132 chimpanzee dyads. Significant *p* values are indicated in bold. R squared ( $r^2$ ) denotes amount of variance in the dependent variable explained by the regression model.

Table S16.1 Duration of joint feeding behaviour ( $r^2 = 0.153$ )

|                     | Standardized coefficient | Standard error | <i>p</i>      |
|---------------------|--------------------------|----------------|---------------|
| Age                 | -0.03                    | 0.64           | 0.42429       |
| Sex                 | 0.16                     | 0.58           | 0.07646       |
| Kinship             | 0.29                     | 1.28           | <b>0.007</b>  |
| Reproductive status | 0.26                     | 0.54           | <b>0.0035</b> |
| Penile erection     | 0.04                     | 0.22           | 0.27036       |

Table S16.2 Duration of joint resting behaviour ( $r^2 = 0.070$ )

|     | Standardized coefficient | Standard error | <i>p</i>     |
|-----|--------------------------|----------------|--------------|
| Age | 0.29                     | 1.40           | <b>0.002</b> |

|                     |       |      |         |
|---------------------|-------|------|---------|
| Sex                 | -0.12 | 1.12 | 0.08696 |
| Kinship             | -0.02 | 2.49 | 0.45727 |
| Reproductive status | -0.02 | 1.10 | 0.4018  |
| Penile erection     | -0.01 | 0.49 | 0.5947  |

Table S16.3 Duration of joint travelling behaviour ( $r^2 = 0.095$ )

|                     | Standardized coefficient | Standard error | <i>p</i>     |
|---------------------|--------------------------|----------------|--------------|
| Age                 | 0.28                     | 0.43           | <b>0.005</b> |
| Sex                 | 0.06                     | 0.34           | 0.27886      |
| Kinship             | 0.01                     | 0.74           | 0.29885      |
| Reproductive status | -0.02                    | 0.33           | 0.44378      |
| Penile erection     | 0.07                     | 0.14           | 0.13443      |

Table S16.4 Duration of giving grooming ( $r^2 = 0.086$ )

|         | Standardized coefficient | Standard error | <i>p</i>       |
|---------|--------------------------|----------------|----------------|
| Age     | 0.21                     | 0.56           | <b>0.01899</b> |
| Sex     | 0.06                     | 0.45           | 0.26137        |
| Kinship | 0.11                     | 0.97           | 0.11444        |



|                     |      |      |         |
|---------------------|------|------|---------|
| Reproductive status | 0.14 | 0.50 | 0.06997 |
| Penile erection     | 0.02 | 0.20 | 0.27086 |

Table S16.5 Duration of mutual grooming ( $r^2 = 0.055$ )

|                     | Standardized coefficient | Standard error | <i>p</i> |
|---------------------|--------------------------|----------------|----------|
| Age                 | 0.19                     | 0.74           | 0.07746  |
| Sex                 | -0.09                    | 0.61           | 0.1959   |
| Kinship             | 0.01                     | 1.22           | 0.28636  |
| Reproductive status | 0.16                     | 0.65           | 0.10745  |
| Penile erection     | -0.04                    | 0.23           | 0.36432  |

Table S16.6 Duration of receiving grooming ( $r^2 = 0.047$ )

|                     | Standardized coefficient | Standard error | <i>p</i>       |
|---------------------|--------------------------|----------------|----------------|
| Age                 | -0.10                    | 0.49           | 0.15742        |
| Sex                 | 0.12                     | 0.41           | 0.10745        |
| Kinship             | 0.00                     | 0.87           | 0.63968        |
| Reproductive status | 0.16                     | 0.47           | <b>0.03198</b> |

|                 |       |      |         |
|-----------------|-------|------|---------|
| Penile erection | -0.04 | 0.21 | 0.30285 |
|-----------------|-------|------|---------|

Table S16.7 Duration of visual attention towards dyad partner ( $r^2 = 0.155$ )

|                     | Standardized coefficient | Standard error | <i>p</i>      |
|---------------------|--------------------------|----------------|---------------|
| Age                 | 0.10                     | 1.40           | 0.16492       |
| Sex                 | 0.08                     | 1.15           | 0.18241       |
| Kinship             | 0.18                     | 2.68           | 0.06297       |
| Reproductive status | 0.33                     | 1.66           | <b>0.0045</b> |
| Penile erection     | -0.01                    | 0.47           | 0.50825       |

Table S16.8 Duration of visual attention away from dyad partner ( $r^2 = 0.121$ )

|                     | Standardized coefficient | Standard error | <i>p</i>      |
|---------------------|--------------------------|----------------|---------------|
| Age                 | 0.37                     | 1.75           | <b>0.0015</b> |
| Sex                 | -0.06                    | 1.29           | 0.25187       |
| Kinship             | 0.07                     | 2.83           | 0.13493       |
| Reproductive status | 0.04                     | 1.39           | 0.36932       |
| Penile erection     | -0.01                    | 0.62           | 0.56722       |

Table S16.9 Duration of time in close proximity – within 2 m ( $r^2 = 0.156$ )

|                     | Standardized coefficient | Standard error | <i>p</i>       |
|---------------------|--------------------------|----------------|----------------|
| Age                 | 0.31                     | 2.55           | <b>0.001</b>   |
| Sex                 | 0.00                     | 1.80           | 0.45977        |
| Kinship             | 0.15                     | 4.22           | <b>0.04248</b> |
| Reproductive status | 0.21                     | 2.68           | 0.05147        |
| Penile erection     | -0.01                    | 0.80           | 0.52074        |

Table S16.10 Rate of scratch produced ( $r^2 = 0.056$ )

|                     | Standardized coefficient | Standard error | <i>p</i>       |
|---------------------|--------------------------|----------------|----------------|
| Age                 | 0.021                    | 0.607          | 0.41429        |
| Sex                 | 0.218                    | 0.558          | <b>0.02849</b> |
| Kinship             | 0.086                    | 1.124          | 0.15942        |
| Reproductive status | 0.018                    | 0.431          | 0.42229        |
| Penile erection     | 0.102                    | 0.222          | 0.11494        |

Table S16.11 Rate of scratch received ( $r^2 = 0.046$ )

|  | Standardized | Standard error | <i>p</i> |
|--|--------------|----------------|----------|
|--|--------------|----------------|----------|

|                     | coefficient |      |                |
|---------------------|-------------|------|----------------|
| Age                 | 0.02        | 0.61 | 0.44728        |
| Sex                 | 0.20        | 0.55 | <b>0.04148</b> |
| Kinship             | 0.08        | 1.13 | 0.18291        |
| Reproductive status | 0.03        | 0.44 | 0.36282        |
| Penile erection     | 0.00        | 0.23 | 0.5942         |

### Gestures accompanied by piloerection

Supplementary Table S17. MRQAP regression models predicting durations of social behavior, per hour dyad spent within 10m. Predictor variables were rates of gestures between the recipient and the signaller are accompanied by piloerection, per hour dyad spent within 10m and demographic variables. Based on 132 chimpanzee dyads. Significant  $p$  values are indicated in bold. R squared ( $r^2$ ) denotes amount of variance in the dependent variable explained by the regression model.

Table S17.1 Duration of joint feeding behaviour ( $r^2 = 0.153$ )

|                     | Standardized coefficient | Standard error | $p$           |
|---------------------|--------------------------|----------------|---------------|
| Age                 | -0.02                    | 0.64           | 0.43828       |
| Sex                 | 0.15                     | 0.57           | 0.08396       |
| Kinship             | 0.29                     | 1.29           | <b>0.0085</b> |
| Reproductive status | 0.26                     | 0.57           | <b>0.002</b>  |

|              |       |      |         |
|--------------|-------|------|---------|
| Piloerection | -0.04 | 0.04 | 0.35782 |
|--------------|-------|------|---------|

Table S17.2 Duration of joint resting behaviour ( $r^2 = 0.070$ )

|                     | Standardized coefficient | Standard error | <i>p</i>     |
|---------------------|--------------------------|----------------|--------------|
| Age                 | 0.30                     | 1.38           | <b>0.004</b> |
| Sex                 | -0.12                    | 1.11           | 0.08496      |
| Kinship             | -0.02                    | 2.39           | 0.43878      |
| Reproductive status | -0.02                    | 1.13           | 0.43728      |
| Piloerection        | -0.02                    | 0.10           | 0.49525      |

Table S17.3 Duration of joint travelling behaviour ( $r^2 = 0.231$ )

|                     | Standardized coefficient | Standard error | <i>p</i>       |
|---------------------|--------------------------|----------------|----------------|
| Age                 | 0.22                     | 0.38           | <b>0.01749</b> |
| Sex                 | 0.06                     | 0.30           | 0.24438        |
| Kinship             | 0.02                     | 0.65           | 0.28036        |
| Reproductive status | -0.03                    | 0.28           | 0.36982        |
| Piloerection        | 0.38                     | 0.03           | <b>0.006</b>   |

Table S17.4 Duration of giving grooming ( $r^2 = 0.094$ )

|                     | Standardized coefficient | Standard error | <i>p</i>       |
|---------------------|--------------------------|----------------|----------------|
| Age                 | 0.19                     | 0.56           | <b>0.03098</b> |
| Sex                 | 0.06                     | 0.44           | 0.24588        |
| Kinship             | 0.11                     | 1.00           | 0.11994        |
| Reproductive status | 0.14                     | 0.49           | 0.06747        |
| Piloerection        | 0.09                     | 0.04           | 0.10845        |

Table S17.5 Duration of mutual grooming ( $r^2 = 0.229$ )

|                     | Standardized coefficient | Standard error | <i>p</i>     |
|---------------------|--------------------------|----------------|--------------|
| Age                 | 0.13                     | 0.63           | 0.10495      |
| Sex                 | -0.07                    | 0.52           | 0.23188      |
| Kinship             | 0.03                     | 1.10           | 0.24588      |
| Reproductive status | 0.14                     | 0.54           | 0.08646      |
| Piloerection        | 0.42                     | 0.04           | <b>0.004</b> |

Table S17.6 Duration of receiving grooming ( $r^2 = 0.065$ )

|  | Standardized | Standard error | <i>p</i> |
|--|--------------|----------------|----------|
|--|--------------|----------------|----------|

|                     | coefficient |      |         |
|---------------------|-------------|------|---------|
| Age                 | -0.12       | 0.50 | 0.09045 |
| Sex                 | 0.13        | 0.42 | 0.07896 |
| Kinship             | 0.01        | 0.88 | 0.31334 |
| Reproductive status | 0.15        | 0.46 | 0.05547 |
| Piloerection        | 0.14        | 0.04 | 0.08896 |

Table S17.7 Duration of visual attention towards dyad partner ( $r^2 = 0.278$ )

|                     | Standardized coefficient | Standard error | <i>p</i>       |
|---------------------|--------------------------|----------------|----------------|
| Age                 | 0.04                     | 1.32           | 0.31284        |
| Sex                 | 0.10                     | 1.08           | 0.14193        |
| Kinship             | 0.20                     | 2.42           | <b>0.02099</b> |
| Reproductive status | 0.31                     | 1.46           | <b>0.0015</b>  |
| Piloerection        | 0.35                     | 0.10           | <b>0.0055</b>  |

Table S17.8 Duration of visual attention away from dyad partner ( $r^2 = 0.121$ )

|     | Standardized coefficient | Standard error | <i>p</i>     |
|-----|--------------------------|----------------|--------------|
| Age | 0.36                     | 1.76           | <b>0.001</b> |

|                     |       |      |         |
|---------------------|-------|------|---------|
| Sex                 | -0.06 | 1.32 | 0.24188 |
| Kinship             | 0.07  | 2.87 | 0.13493 |
| Reproductive status | 0.04  | 1.42 | 0.35882 |
| Piloerection        | 0.02  | 0.13 | 0.29685 |

Table S17.9 Duration of time in close proximity – within 2 m ( $r^2 = 0.200$ )

|                     | Standardized coefficient | Standard error | <i>p</i>       |
|---------------------|--------------------------|----------------|----------------|
| Age                 | 0.27                     | 2.37           | <b>0.002</b>   |
| Sex                 | 0.01                     | 1.77           | 0.41279        |
| Kinship             | 0.16                     | 4.15           | <b>0.03898</b> |
| Reproductive status | 0.20                     | 2.52           | <b>0.04248</b> |
| Piloerection        | 0.21                     | 0.17           | <b>0.02749</b> |

Table S17.10 Rate of scratch produced ( $r^2 = 0.101$ )

|         | Standardized coefficient | Standard error | <i>p</i>       |
|---------|--------------------------|----------------|----------------|
| Age     | -0.020                   | 0.618          | 0.43228        |
| Sex     | 0.210                    | 0.548          | <b>0.02699</b> |
| Kinship | 0.088                    | 1.150          | 0.15892        |



|                     |       |       |                |
|---------------------|-------|-------|----------------|
| Reproductive status | 0.020 | 0.408 | 0.3973         |
| Piloerection        | 0.237 | 0.043 | <b>0.02249</b> |

Table S17.11 Rate of scratch received ( $r^2 = 0.048$ )

|                     | Standardized coefficient | Standard error | <i>p</i>       |
|---------------------|--------------------------|----------------|----------------|
| Age                 | 0.02                     | 0.64           | 0.4058         |
| Sex                 | 0.20                     | 0.56           | <b>0.04598</b> |
| Kinship             | 0.08                     | 1.14           | 0.18091        |
| Reproductive status | 0.03                     | 0.44           | 0.36332        |
| Piloerection        | -0.05                    | 0.04           | 0.32784        |

### Single gestures, rapid and persistence sequences

Supplementary Table S18. MRQAP regression models predicting durations of social behavior, per hour dyad spent within 10m. Predictor variables were rates of single gestures, rapid and persistence sequences between the signaller and the recipient, per hour dyad spent within 10m and demographic variables. Based on 132 chimpanzee dyads. Significant *p* values are indicated in bold. R squared ( $r^2$ ) denotes amount of variance in the dependent variable explained by the regression model.

Table S18.1 Duration of joint feeding behaviour ( $r^2 = 0.157$ )

|  | Standardized | Standard error | <i>p</i> |
|--|--------------|----------------|----------|
|--|--------------|----------------|----------|

|                     | coefficient |      |               |
|---------------------|-------------|------|---------------|
| Age                 | -0.03       | 0.67 | 0.3978        |
| Sex                 | 0.14        | 0.58 | 0.09445       |
| Kinship             | 0.28        | 1.31 | <b>0.008</b>  |
| Reproductive status | 0.25        | 0.56 | <b>0.0045</b> |
| Rapid sequence      | -0.06       | 0.19 | 0.27286       |
| Single no sequence  | 0.08        | 0.06 | 0.16042       |
| Persistence         | -0.03       | 0.53 | 0.37131       |

Table S18.2 Duration of joint resting behaviour ( $r^2 = 0.077$ )

|                     | Standardized coefficient | Standard error | <i>p</i>      |
|---------------------|--------------------------|----------------|---------------|
| Age                 | 0.29                     | 1.39           | <b>0.0015</b> |
| Sex                 | -0.13                    | 1.12           | 0.05497       |
| Kinship             | -0.02                    | 2.41           | 0.44328       |
| Reproductive status | -0.04                    | 1.13           | 0.3993        |
| Rapid sequence      | -0.03                    | 0.47           | 0.35282       |
| Single no sequence  | 0.08                     | 0.15           | 0.09995       |
| Persistence         | 0.03                     | 1.25           | 0.22889       |

Table S18.3 Duration of joint travelling behaviour ( $r^2 = 0.259$ )

|                     | Standardized coefficient | Standard error | <i>p</i>       |
|---------------------|--------------------------|----------------|----------------|
| Age                 | 0.22                     | 0.37           | <b>0.01449</b> |
| Sex                 | 0.02                     | 0.31           | 0.38581        |
| Kinship             | 0.02                     | 0.65           | 0.25737        |
| Reproductive status | -0.07                    | 0.28           | 0.21689        |
| Rapid sequence      | 0.20                     | 0.11           | <b>0.02049</b> |
| Single no sequence  | 0.22                     | 0.04           | <b>0.02699</b> |
| Persistence         | 0.14                     | 0.29           | <b>0.04548</b> |

Table S18.4 Duration of giving grooming ( $r^2 = 0.474$ )

|                     | Standardized coefficient | Standard error | <i>p</i> |
|---------------------|--------------------------|----------------|----------|
| Age                 | 0.11                     | 0.41           | 0.07246  |
| Sex                 | 0.01                     | 0.33           | 0.41979  |
| Kinship             | 0.10                     | 0.73           | 0.05447  |
| Reproductive status | 0.02                     | 0.34           | 0.44878  |

|                       |       |      |              |
|-----------------------|-------|------|--------------|
| Rapid sequence        | 0.03  | 0.13 | 0.2024       |
| Single no<br>sequence | 0.66  | 0.06 | <b>0.001</b> |
| Persistence           | -0.05 | 0.38 | 0.14243      |

Table S18.5 Duration of mutual grooming ( $r^2 = 0.286$ )

|                        | Standardized<br>coefficient | Standard error | <i>p</i>       |
|------------------------|-----------------------------|----------------|----------------|
| Age                    | 0.13                        | 0.61           | 0.08346        |
| Sex                    | -0.13                       | 0.53           | 0.09845        |
| Kinship                | 0.03                        | 1.14           | 0.26437        |
| Reproductive<br>status | 0.08                        | 0.49           | 0.16942        |
| Rapid sequence         | 0.16                        | 0.17           | <b>0.04198</b> |
| Single no<br>sequence  | 0.33                        | 0.06           | <b>0.01249</b> |
| Persistence            | 0.16                        | 0.48           | <b>0.03498</b> |

Table S18.6 Duration of receiving grooming ( $r^2 = 0.077$ )

|     | Standardized<br>coefficient | Standard error | <i>p</i> |
|-----|-----------------------------|----------------|----------|
| Age | -0.11                       | 0.51           | 0.12044  |

|                     |      |      |         |
|---------------------|------|------|---------|
| Sex                 | 0.11 | 0.43 | 0.13293 |
| Kinship             | 0.00 | 0.84 | 0.31384 |
| Reproductive status | 0.12 | 0.46 | 0.09595 |
| Rapid sequence      | 0.00 | 0.16 | 0.37331 |
| Single no sequence  | 0.16 | 0.05 | 0.05147 |
| Persistence         | 0.05 | 0.46 | 0.14343 |

Table S18.7 Duration of visual attention towards dyad partner ( $r^2 = 0.433$ )

|                     | Standardized coefficient | Standard error | <i>p</i>       |
|---------------------|--------------------------|----------------|----------------|
| Age                 | 0.02                     | 1.18           | 0.38431        |
| Sex                 | 0.04                     | 0.97           | 0.30135        |
| Kinship             | 0.19                     | 2.19           | <b>0.01049</b> |
| Reproductive status | 0.23                     | 1.15           | <b>0.02099</b> |
| Rapid sequence      | 0.09                     | 0.36           | 0.12094        |
| Single no sequence  | 0.47                     | 0.13           | <b>0.001</b>   |
| Persistence         | 0.09                     | 1.04           | 0.12444        |

Table S18.8 Duration of visual attention away from dyad partner ( $r^2 = 0.168$ )

|                     | Standardized coefficient | Standard error | <i>p</i>       |
|---------------------|--------------------------|----------------|----------------|
| Age                 | 0.34                     | 1.74           | <b>0.001</b>   |
| Sex                 | -0.09                    | 1.31           | 0.16492        |
| Kinship             | 0.07                     | 2.71           | 0.12994        |
| Reproductive status | 0.00                     | 1.33           | 0.48226        |
| Rapid sequence      | -0.01                    | 0.48           | 0.47926        |
| Single no sequence  | 0.23                     | 0.17           | <b>0.02649</b> |
| Persistence         | 0.02                     | 1.49           | 0.33083        |

Table S18.9 Duration of time in close proximity – within 2 m ( $r^2 = 0.354$ )

|                     | Standardized coefficient | Standard error | <i>p</i>       |
|---------------------|--------------------------|----------------|----------------|
| Age                 | 0.25                     | 2.19           | <b>0.003</b>   |
| Sex                 | -0.04                    | 1.66           | 0.28636        |
| Kinship             | 0.15                     | 3.68           | <b>0.02549</b> |
| Reproductive status | 0.13                     | 2.07           | 0.09995        |
| Rapid sequence      | 0.04                     | 0.65           | 0.27586        |

|                       |      |      |               |
|-----------------------|------|------|---------------|
| Single no<br>sequence | 0.42 | 0.25 | <b>0.0005</b> |
| Persistence           | 0.06 | 1.86 | 0.1954        |

Table S18.10 Rate of scratch produced ( $r^2 = 0.397$ )

|                        | Standardized<br>coefficient | Standard error | <i>p</i>      |
|------------------------|-----------------------------|----------------|---------------|
| Age                    | 0.04                        | 0.51           | 0.29735       |
| Sex                    | 0.12                        | 0.46           | 0.10395       |
| Kinship                | 0.09                        | 0.92           | 0.10645       |
| Reproductive<br>status | -0.02                       | 0.34           | 0.4053        |
| Rapid sequence         | -0.02                       | 0.15           | 0.44528       |
| Single no<br>sequence  | 0.08                        | 0.05           | 0.12244       |
| Persistence            | 0.57                        | 0.50           | <b>0.0005</b> |

Table S18.11 Rate of scratch received ( $r^2 = 0.061$ )

|     | Standardized<br>coefficient | Standard error | <i>p</i>       |
|-----|-----------------------------|----------------|----------------|
| Age | 0.04                        | 0.63           | 0.34783        |
| Sex | 0.21                        | 0.55           | <b>0.03298</b> |

|                     |       |      |                |
|---------------------|-------|------|----------------|
| Kinship             | 0.08  | 1.21 | 0.18141        |
| Reproductive status | 0.05  | 0.45 | 0.24938        |
| Rapid sequence      | 0.01  | 0.19 | 0.42379        |
| Single no sequence  | -0.14 | 0.06 | <b>0.04448</b> |
| Persistence         | 0.06  | 0.51 | 0.2034         |

**Association between the duration of social behaviour and gestural communication categorized according to function**

**Gesture functions**

Supplementary Table S19. MRQAP regression models predicting durations of social behavior, per hour dyad spent within 10m. Predictors were demographic variables and functions of gestures. Dyads were classified as same age or different age (within 5 years), same sex or different sex, related by maternal kinship and as the same or different reproductive status (reproductively active, not reproductively active). Based on 132 dyadic relationships of the chimpanzees. Significant *p* values are indicated in bold. R squared ( $r^2$ ) denotes amount of variance in the dependent variable explained by the regression model.

Table S19.1 Duration of joint feeding behaviour ( $r^2 = 0.310$ )

|     | Standardized coefficient | Standard error | <i>p</i> |
|-----|--------------------------|----------------|----------|
| Age | -0.04                    | 0.65           | 0.34233  |



|                                      |       |      |                |
|--------------------------------------|-------|------|----------------|
| Sex                                  | 0.11  | 0.55 | 0.11494        |
| Kinship                              | 0.27  | 1.20 | <b>0.0055</b>  |
| Reproductive status                  | 0.22  | 0.56 | <b>0.006</b>   |
| Copulation                           | 0.05  | 0.31 | 0.16292        |
| Food sharing                         | 0.10  | 8.36 | 0.08096        |
| Threat to dominate                   | -0.50 | 1.64 | <b>0.04548</b> |
| Give groom                           | 0.17  | 0.13 | <b>0.03998</b> |
| Mutually groom                       | 0.66  | 2.39 | 0.09795        |
| Receive groom                        | 0.47  | 0.55 | <b>0.01249</b> |
| Reassurance                          | -0.59 | 1.87 | 0.11194        |
| Other threat                         | -0.02 | 0.71 | 0.41279        |
| Synchronized high-intensity panthoot | -0.08 | 0.29 | 0.10545        |
| Solo high-intensity panthoot         | 0.02  | 0.53 | 0.30985        |
| Synchronized low-intensity panthoot  | 0.14  | 0.69 | <b>0.04398</b> |
| Play                                 | -0.19 | 0.13 | <b>0.0045</b>  |
| Greeting                             | -0.11 | 0.30 | 0.05347        |
| Travel                               | 0.05  | 0.81 | 0.13493        |

Table S19.2 Duration of joint resting behaviour ( $r^2 = 0.099$ )

|                                      | Standardized coefficient | Standard error | <i>p</i>       |
|--------------------------------------|--------------------------|----------------|----------------|
| Age                                  | 0.27                     | 1.63           | <b>0.01499</b> |
| Sex                                  | -0.12                    | 1.25           | 0.08746        |
| Kinship                              | -0.02                    | 2.70           | 0.43428        |
| Reproductive status                  | -0.05                    | 1.28           | 0.35432        |
| Copulation                           | 0.01                     | 0.84           | 0.33883        |
| Food sharing                         | 0.01                     | 23.98          | 0.32234        |
| Threat to dominate                   | -0.20                    | 3.57           | 0.17641        |
| Give groom                           | 0.11                     | 0.31           | 0.06097        |
| Mutually groom                       | 0.10                     | 6.48           | 0.35732        |
| Receive groom                        | 0.08                     | 1.44           | 0.16492        |
| Reassurance                          | 0.03                     | 4.55           | 0.49125        |
| Other threat                         | -0.03                    | 1.75           | 0.32534        |
| Synchronized high-intensity panthoot | -0.07                    | 0.66           | 0.09645        |
| Solo high-intensity panthoot         | -0.01                    | 1.34           | 0.49825        |
| Synchronized low-intensity panthoot  | 0.05                     | 2.00           | 0.09045        |
| Play                                 | -0.04                    | 0.27           | 0.18841        |
| Greeting                             | 0.04                     | 0.75           | 0.17291        |

|        |      |      |         |
|--------|------|------|---------|
| Travel | 0.03 | 1.73 | 0.13493 |
|--------|------|------|---------|

Table S19.3 Duration of joint travelling behaviour ( $r^2 = 0.420$ )

|                                      | Standardized coefficient | Standard error | <i>p</i>       |
|--------------------------------------|--------------------------|----------------|----------------|
| Age                                  | 0.20                     | 0.35           | <b>0.01399</b> |
| Sex                                  | 0.08                     | 0.29           | 0.18191        |
| Kinship                              | 0.02                     | 0.58           | 0.24038        |
| Reproductive status                  | -0.06                    | 0.26           | 0.21139        |
| Copulation                           | 0.05                     | 0.18           | 0.08496        |
| Food sharing                         | -0.01                    | 5.05           | 0.44828        |
| Threat to dominate                   | 0.03                     | 1.10           | 0.34733        |
| Give groom                           | 0.05                     | 0.07           | 0.16042        |
| Mutually groom                       | 0.03                     | 1.42           | 0.44578        |
| Receive groom                        | 0.08                     | 0.32           | 0.17391        |
| Reassurance                          | 0.37                     | 1.02           | 0.12394        |
| Other threat                         | -0.05                    | 0.39           | 0.11044        |
| Synchronized high-intensity panthoot | -0.06                    | 0.14           | 0.11694        |
| Solo high-intensity panthoot         | 0.10                     | 0.30           | 0.05547        |
| Synchronized low-intensity panthoot  | 0.26                     | 0.45           | <b>0.01249</b> |

|          |       |      |                |
|----------|-------|------|----------------|
| Play     | -0.03 | 0.07 | 0.2099         |
| Greeting | 0.01  | 0.17 | 0.34783        |
| Travel   | 0.10  | 0.44 | <b>0.04898</b> |

Table S19.4 Duration of giving grooming ( $r^2 = 0.740$ )

|                                      | Standardized coefficient | Standard error | <i>p</i>       |
|--------------------------------------|--------------------------|----------------|----------------|
| Age                                  | 0.06                     | 0.30           | 0.11244        |
| Sex                                  | -0.01                    | 0.24           | 0.3988         |
| Kinship                              | 0.09                     | 0.48           | <b>0.02199</b> |
| Reproductive status                  | 0.00                     | 0.23           | 0.53273        |
| Copulation                           | -0.01                    | 0.21           | 0.43878        |
| Food sharing                         | -0.01                    | 6.39           | 0.28286        |
| Threat to dominate                   | -0.20                    | 1.17           | 0.10745        |
| Give groom                           | 0.69                     | 0.12           | <b>0.0005</b>  |
| Mutually groom                       | -0.10                    | 1.45           | 0.33183        |
| Receive groom                        | 0.20                     | 0.33           | <b>0.03648</b> |
| Reassurance                          | 0.20                     | 1.08           | 0.18991        |
| Other threat                         | -0.06                    | 0.47           | <b>0.02949</b> |
| Synchronized high-intensity panthoot | 0.03                     | 0.18           | 0.12244        |

|                                     |       |      |                |
|-------------------------------------|-------|------|----------------|
| Solo high-intensity panthoot        | 0.00  | 0.34 | 0.38831        |
| Synchronized low-intensity panthoot | -0.04 | 0.44 | 0.06197        |
| Play                                | 0.19  | 0.09 | <b>0.01049</b> |
| Greeting                            | 0.11  | 0.19 | <b>0.02549</b> |
| Travel                              | 0.10  | 0.54 | <b>0.03498</b> |

Table S19.5 Duration of mutual grooming ( $r^2 = 0.586$ )

|                     | Standardized coefficient | Standard error | <i>p</i>       |
|---------------------|--------------------------|----------------|----------------|
| Age                 | 0.12                     | 0.53           | 0.07246        |
| Sex                 | -0.16                    | 0.45           | <b>0.007</b>   |
| Kinship             | -0.01                    | 0.90           | 0.58871        |
| Reproductive status | 0.08                     | 0.42           | 0.11044        |
| Copulation          | 0.01                     | 0.25           | 0.27386        |
| Food sharing        | -0.02                    | 9.54           | 0.28936        |
| Threat to dominate  | -0.65                    | 1.45           | <b>0.006</b>   |
| Give groom          | 0.03                     | 0.11           | 0.21839        |
| Mutually groom      | 1.14                     | 1.97           | <b>0.01049</b> |
| Receive groom       | 0.53                     | 0.48           | <b>0.0085</b>  |
| Reassurance         | -0.25                    | 1.47           | 0.21439        |

|                                      |       |      |                |
|--------------------------------------|-------|------|----------------|
| Other threat                         | -0.03 | 0.58 | 0.31184        |
| Synchronized high-intensity panthoot | 0.01  | 0.27 | 0.5922         |
| Solo high-intensity panthoot         | 0.01  | 0.40 | 0.35582        |
| Synchronized low-intensity panthoot  | 0.05  | 0.58 | 0.08146        |
| Play                                 | -0.10 | 0.10 | <b>0.01249</b> |
| Greeting                             | -0.05 | 0.21 | 0.11144        |
| Travel                               | 0.01  | 0.73 | 0.34483        |

Table S19.6 Duration of receiving grooming ( $r^2 = 0.338$ )

|                     | Standardized coefficient | Standard error | <i>p</i> |
|---------------------|--------------------------|----------------|----------|
| Age                 | -0.07                    | 0.50           | 0.24388  |
| Sex                 | 0.03                     | 0.41           | 0.33033  |
| Kinship             | -0.03                    | 0.85           | 0.30585  |
| Reproductive status | 0.10                     | 0.41           | 0.11844  |
| Copulation          | -0.02                    | 0.24           | 0.43228  |
| Food sharing        | -0.01                    | 6.74           | 0.4038   |
| Threat to dominate  | 0.04                     | 1.29           | 0.32384  |
| Give groom          | 0.01                     | 0.10           | 0.52524  |

|                                      |       |      |                |
|--------------------------------------|-------|------|----------------|
| Mutually groom                       | -0.52 | 2.01 | 0.07346        |
| Receive groom                        | 0.90  | 0.53 | <b>0.001</b>   |
| Reassurance                          | -0.04 | 1.37 | 0.37881        |
| Other threat                         | 0.02  | 0.53 | 0.1919         |
| Synchronized high-intensity panthoot | -0.02 | 0.20 | 0.37381        |
| Solo high-intensity panthoot         | -0.01 | 0.41 | 0.48626        |
| Synchronized low-intensity panthoot  | -0.01 | 0.60 | 0.56172        |
| Play                                 | -0.20 | 0.10 | <b>0.002</b>   |
| Greeting                             | -0.08 | 0.25 | <b>0.04148</b> |
| Travel                               | 0.02  | 0.55 | 0.13093        |

Table S19.7 Duration of visual attention towards dyad partner ( $r^2 = 0.641$ )

|                     | Standardized coefficient | Standard error | <i>p</i>       |
|---------------------|--------------------------|----------------|----------------|
| Age                 | 0.00                     | 1.07           | 0.47326        |
| Sex                 | 0.01                     | 0.86           | 0.43478        |
| Kinship             | 0.16                     | 1.96           | <b>0.01349</b> |
| Reproductive status | 0.23                     | 1.06           | <b>0.0015</b>  |

|                                         |       |       |                |
|-----------------------------------------|-------|-------|----------------|
| Copulation                              | 0.02  | 0.53  | 0.26837        |
| Food sharing                            | 0.01  | 16.60 | 0.28686        |
| Threat to dominate                      | -0.64 | 2.91  | <b>0.0045</b>  |
| Give groom                              | 0.25  | 0.26  | <b>0.01149</b> |
| Mutually groom                          | 0.79  | 3.97  | <b>0.02549</b> |
| Receive groom                           | 0.51  | 0.96  | <b>0.001</b>   |
| Reassurance                             | -0.02 | 3.10  | 0.47926        |
| Other threat                            | -0.01 | 1.16  | 0.51474        |
| Synchronized high-intensity<br>panthoot | -0.07 | 0.48  | 0.07146        |
| Solo high-intensity panthoot            | 0.03  | 0.89  | 0.24588        |
| Synchronized low-intensity panthoot     | 0.10  | 1.25  | <b>0.04848</b> |
| Play                                    | -0.09 | 0.24  | <b>0.01799</b> |
| Greeting                                | -0.02 | 0.60  | 0.41529        |
| Travel                                  | 0.04  | 1.33  | 0.14193        |

Table S19.8 Duration of visual attention away dyad partner ( $r^2 = 0.276$ )

|  | Standardized<br>coefficient | Standard error | <i>p</i> |
|--|-----------------------------|----------------|----------|
|--|-----------------------------|----------------|----------|



|                                         |       |       |                |
|-----------------------------------------|-------|-------|----------------|
| Age                                     | 0.33  | 1.87  | <b>0.001</b>   |
| Sex                                     | -0.10 | 1.41  | 0.11044        |
| Kinship                                 | 0.06  | 2.76  | 0.12744        |
| Reproductive status                     | -0.03 | 1.35  | 0.38731        |
| Copulation                              | 0.01  | 0.84  | 0.32584        |
| Food sharing                            | 0.09  | 26.60 | 0.05147        |
| Threat to dominate                      | 0.10  | 4.63  | 0.25037        |
| Give groom                              | 0.24  | 0.37  | <b>0.01999</b> |
| Mutually groom                          | -0.10 | 6.45  | 0.43478        |
| Receive groom                           | 0.38  | 1.55  | <b>0.02249</b> |
| Reassurance                             | -0.29 | 5.47  | 0.2019         |
| Other threat                            | -0.05 | 2.13  | 0.21489        |
| Synchronized high-intensity<br>panthoot | -0.09 | 0.72  | <b>0.04998</b> |
| Solo high-intensity panthoot            | 0.01  | 1.47  | 0.33333        |
| Synchronized low-intensity<br>panthoot  | 0.13  | 2.06  | <b>0.03598</b> |
| Play                                    | -0.04 | 0.33  | 0.2044         |
| Greeting                                | 0.04  | 0.90  | 0.23938        |

|        |      |      |         |
|--------|------|------|---------|
| Travel | 0.06 | 2.13 | 0.09545 |
|--------|------|------|---------|

Table S19.9 Duration of time in close proximity – within 2 m ( $r^2 = 0.515$ )

|                                         | Standardized coefficient | Standard error | <i>p</i>       |
|-----------------------------------------|--------------------------|----------------|----------------|
| Age                                     | 0.23                     | 2.15           | <b>0.004</b>   |
| Sex                                     | -0.06                    | 1.62           | 0.16442        |
| Kinship                                 | 0.13                     | 3.59           | <b>0.04448</b> |
| Reproductive status                     | 0.11                     | 1.77           | 0.07546        |
| Copulation                              | 0.02                     | 0.99           | 0.25287        |
| Food sharing                            | 0.07                     | 29.25          | 0.10595        |
| Threat to dominate                      | -0.29                    | 5.50           | 0.09545        |
| Give groom                              | 0.30                     | 0.47           | <b>0.0075</b>  |
| Mutually groom                          | 0.38                     | 8.36           | 0.16192        |
| Receive groom                           | 0.55                     | 1.95           | <b>0.006</b>   |
| Reassurance                             | -0.21                    | 6.33           | 0.27486        |
| Other threat                            | -0.03                    | 2.35           | 0.27936        |
| Synchronized high-intensity<br>panthoot | -0.10                    | 0.89           | <b>0.01299</b> |
| Solo high-intensity panthoot            | 0.03                     | 1.70           | 0.25737        |

|                                     |       |      |                |
|-------------------------------------|-------|------|----------------|
| Synchronized low-intensity panthoot | 0.14  | 2.59 | <b>0.02399</b> |
| Play                                | -0.08 | 0.40 | <b>0.04698</b> |
| Greeting                            | 0.01  | 1.08 | 0.4013         |
| Travel                              | 0.06  | 2.56 | 0.09995        |

Table S19.10 Rate of scratch produced ( $r^2 = 0.465$ )

|                     | Standardized coefficient | Standard error | <i>p</i>       |
|---------------------|--------------------------|----------------|----------------|
| Age                 | -0.05                    | 0.55           | 0.30035        |
| Sex                 | 0.17                     | 0.49           | <b>0.03348</b> |
| Kinship             | 0.10                     | 0.99           | 0.09045        |
| Reproductive status | 0.01                     | 0.41           | 0.46977        |
| Copulation          | 0.12                     | 0.27           | 0.07396        |
| Food sharing        | -0.02                    | 7.31           | 0.49425        |
| Threat to dominate  | 0.19                     | 1.42           | 0.1929         |
| Give groom          | 0.10                     | 0.11           | 0.10545        |
| Mutually groom      | 0.48                     | 2.05           | 0.15692        |
| Receive groom       | -0.12                    | 0.46           | 0.16542        |
| Reassurance         | -0.20                    | 1.54           | 0.32334        |

|                                      |       |      |              |
|--------------------------------------|-------|------|--------------|
| Other threat                         | 0.48  | 0.65 | <b>0.002</b> |
| Synchronized high-intensity panthoot | -0.04 | 0.23 | 0.33933      |
| Solo high-intensity panthoot         | -0.04 | 0.45 | 0.29785      |
| Synchronized low-intensity panthoot  | 0.11  | 0.59 | 0.07496      |
| Play                                 | -0.05 | 0.11 | 0.1954       |
| Greeting                             | 0.07  | 0.25 | 0.14793      |
| Travel                               | -0.04 | 0.60 | 0.27586      |

Table S19.11 Rate of scratch received ( $r^2 = 0.095$ )

|                     | Standardized coefficient | Standard error | <i>p</i>       |
|---------------------|--------------------------|----------------|----------------|
| Age                 | 0.09                     | 0.72           | 0.1974         |
| Sex                 | 0.21                     | 0.63           | <b>0.03448</b> |
| Kinship             | 0.09                     | 1.34           | 0.17041        |
| Reproductive status | 0.05                     | 0.49           | 0.28336        |
| Copulation          | 0.03                     | 0.34           | 0.27186        |
| Food sharing        | -0.07                    | 11.31          | 0.12894        |
| Threat to dominate  | 0.01                     | 1.88           | 0.3978         |

|                                      |       |      |                |
|--------------------------------------|-------|------|----------------|
| Give groom                           | -0.15 | 0.15 | <b>0.02099</b> |
| Mutually groom                       | 0.20  | 2.67 | 0.34183        |
| Receive groom                        | 0.10  | 0.60 | 0.24288        |
| Reassurance                          | -0.35 | 2.01 | 0.26787        |
| Other threat                         | 0.02  | 0.71 | 0.27536        |
| Synchronized high-intensity panthoot | -0.13 | 0.31 | <b>0.01949</b> |
| Solo high-intensity panthoot         | 0.05  | 0.52 | 0.22139        |
| Synchronized low-intensity panthoot  | 0.09  | 0.67 | 0.10795        |
| Play                                 | -0.05 | 0.14 | 0.28136        |
| Greeting                             | 0.08  | 0.35 | 0.17341        |
| Travel                               | 0.01  | 0.83 | 0.35132        |

Hobaiter K, Byrne R. 2011. Serial gesturing by wild chimpanzees: Its nature and function for communication. *Animal Cognition* 14:827-838.

Nishida T, Zamma K, Matsusaka T, Inaba A, McGrew WC. 2010. Chimpanzee behavior in the wild: An audio-visual encyclopedia. Tokyo: Springer.

Roberts AI, Roberts SGB, Vick S-J. 2014. The repertoire and intentionality of gestural communication in wild chimpanzees. *Animal Cognition* 17(2):317 - 336.

Supplementary Information 2

**Social bonding, gestural complexity and displacement behaviour of wild chimpanzee**

Table 1. Multiple Regression Quadratic Assignment Procedure (MRQAP) regression models predicting duration of social behaviour and rates of scratch from rates of gestural communication. Summary table provides standardized coefficients (standard errors) and *p* values. In all models, the dependent variable was the duration of behaviour in mins, per hour dyad spent within 10 meters or rates of scratch per hour dyad spent within 10 meters. Shaded lines indicate different MRQAP models for demographic variables and for each type of gestural communication. All models include the control variables relating to the age, sex, kinship and reproductive status of the dyad. Green shading indicates statistically significant positive relationships, red shading indicates statistically significant negative relationships. Full results for all models are provided in Supplementary Tables. \* *p* < 0.05, \*\* *p* < 0.01, \*\*\* *p* < 0.001

| Behaviour           | Joint activity   |                  |                   | Groom             |                    |                  | Attention          |                  | Proximity         | Scratch          |                  |
|---------------------|------------------|------------------|-------------------|-------------------|--------------------|------------------|--------------------|------------------|-------------------|------------------|------------------|
|                     | Feed             | Rest             | Travel            | Give              | Mutual             | Receive          | present            | absent           |                   | Produced         | Received         |
| <i>Demography</i>   |                  |                  |                   |                   |                    |                  |                    |                  |                   |                  |                  |
| Age                 | -0.01<br>(0.65)  | 0.29<br>(1.37)** | 0.28<br>(0.42)**  | 0.21<br>(0.54)*   | 0.20<br>(0.70)***  | -0.09<br>(0.48)  | 0.12<br>(1.47)     | 0.37<br>(1.73)** | 0.32<br>(2.50)*** | 0.02<br>(0.61)   | 0.02<br>(0.61)   |
| Sex                 | 0.31<br>(0.69)** | -0.14<br>(1.31)  | 0.05<br>(0.39)    | 0.11<br>(0.53)    | 0.12<br>(2.49)     | 0.20<br>(0.51)*  | 0.30<br>(1.55)**   | -0.06<br>(1.28)  | 0.12<br>(2.49)    | 0.20<br>(0.56)*  | 0.20<br>(0.56)*  |
| Kinship             | 0.28<br>(1.28)*  | -0.02<br>(2.25)  | 0.01<br>(0.72)    | 0.10<br>(0.96)    | 0.15<br>(4.39)     | -0.01<br>(0.88)  | 0.18<br>(2.62)     | 0.07<br>(2.78)   | 0.15<br>(4.39)    | 0.08<br>(1.14)   | 0.08<br>(1.14)   |
| Reproductive status | 0.22<br>(0.72)*  | 0.04<br>(1.46)   | 0.01<br>(0.43)    | 0.03<br>(0.42)    | 0.14<br>(3.55)     | 0.08<br>(0.63)   | 0.28<br>(2.12)*    | 0.04<br>(1.39)   | 0.14<br>(3.55)    | 0.03<br>(0.42)   | 0.03<br>(0.44)   |
| <i>Modality</i>     |                  |                  |                   |                   |                    |                  |                    |                  |                   |                  |                  |
| Visual              | 0.15<br>(0.07)   | 0.02<br>(0.15)   | 0.62<br>(0.04)*   | -0.26<br>(0.04)** | 0.88<br>(0.07)***  | 0.50<br>(0.06)*  | 0.75<br>(0.15)***  | 0.033<br>(0.179) | 0.45<br>(0.28)*   | 0.48<br>(0.07)*  | 0.08<br>(0.07)   |
| ASR                 | 0.21<br>(0.11)*  | 0.13<br>(0.24)*  | 0.04<br>(0.05)    | 0.73<br>(0.09)*** | 0.01<br>(0.08)     | 0.04<br>(0.08)   | 0.24<br>(0.19)*    | 0.290<br>(0.28)* | 0.34<br>(0.39)*   | 0.13<br>(0.10)   | -0.10<br>(0.10)* |
| ALR                 | -0.08<br>(0.13)  | -0.06<br>(0.34)  | -0.28<br>(0.08)** | 0.19<br>(0.08)*   | -0.51<br>(0.12)*** | -0.27<br>(0.13)* | -0.44<br>(0.25)*** | -0.03<br>(0.37)  | -0.27<br>(0.48)** | -0.16<br>(0.13)* | -0.08<br>(0.14)  |
| Tactile             | -0.22            | 0.004            | -0.02             | 0.41              | -0.03              | -0.20            | -0.02              | 0.03             | 0.01              | -0.07            | -0.07            |

|                                      | Joint activity  |                 |                  | Groom                 |                   |                 | Attention             |                 | Proximity         | Scratch         |                 |
|--------------------------------------|-----------------|-----------------|------------------|-----------------------|-------------------|-----------------|-----------------------|-----------------|-------------------|-----------------|-----------------|
| Behaviour                            | Feed            | Rest            | Travel           | Give                  | Mutual            | Receive         | present               | absent          |                   | Produced        | Received        |
|                                      | (0.13)**        | (0.29)          | (0.07)           | (0.08)<br>***         | (0.10)            | (0.12)***       | (0.22)                | (0.37)          | (0.42)            | (0.12)          | (0.13)          |
| <i>Object use</i>                    |                 |                 |                  |                       |                   |                 |                       |                 |                   |                 |                 |
| No object                            | 0.03<br>(0.04)  | 0.10<br>(0.08)  | 0.47<br>(0.02)** | 0.64<br>(0.04)**      | 0.64<br>(0.04)*** | 0.22<br>(0.03)* | 0.69<br>(0.10)***     | 0.24<br>(0.10)* | 0.56<br>(0.15)*** | 0.40<br>(0.03)* | -0.06<br>(0.03) |
| Object                               | -0.01<br>(0.08) | -0.08<br>(0.18) | -0.04<br>(0.04)  | -0.20<br>(0.06)**     | -0.15<br>(0.07)** | -0.04<br>(0.07) | -0.18<br>(0.14)**     | -0.10<br>(0.20) | -0.17<br>(0.26)** | -0.02<br>(0.07) | -0.01<br>(0.08) |
| <i>Multimodal</i>                    |                 |                 |                  |                       |                   |                 |                       |                 |                   |                 |                 |
| Unimodal                             | 0.16<br>(0.05)  | 0.06<br>(0.11)  | 0.22<br>(0.03)*  | 0.75<br>(0.04)<br>*** | 0.27<br>(0.04)*   | 0.25<br>(0.04)* | 0.44<br>(0.09)<br>*** | 0.27<br>(0.13)* | 0.44<br>(0.17)**  | 0.18<br>(0.04)* | -0.12<br>(0.05) |
| Multimodal<br>(facial<br>expression) | -0.13<br>(0.53) | 0.06<br>(1.12)  | 0.30<br>(0.31)*  | -0.23<br>(0.40)**     | 0.44<br>(0.47)*   | 0.001<br>(0.44) | 0.31<br>(0.93)**      | -0.04<br>(1.40) | 0.14<br>(1.69)*   | 0.18<br>(0.49)* | 0.06<br>(0.52)  |
| Multimodal<br>(vocal)                | -0.07<br>(0.07) | -0.06<br>(0.16) | 0.01<br>(0.04)   | -0.07<br>(0.05)       | -0.03<br>(0.06)   | -0.09<br>(0.05) | -0.09<br>(0.12)*      | -0.08<br>(0.19) | -0.11<br>(0.23)*  | 0.14<br>(0.06)  | 0.01<br>(0.07)  |
| <i>Repertoire<br/>size</i>           |                 |                 |                  |                       |                   |                 |                       |                 |                   |                 |                 |
| Dyadic<br>repertoire<br>size         | -0.02<br>(0.04) | 0.001<br>(0.10) | 0.34<br>(0.03)** | 0.26<br>(0.04)*       | 0.45<br>(0.05)**  | 0.14<br>(0.04)  | 0.42<br>(0.11)**      | 0.06<br>(0.12)  | 0.28<br>(0.20)*   | 0.35<br>(0.04)* | -0.04<br>(0.04) |
| <i>Combined<br/>gestures</i>         |                 |                 |                  |                       |                   |                 |                       |                 |                   |                 |                 |
| Single (non-<br>combined)            | 0.02<br>(0.04)  | 0.06<br>(0.10)  | 0.09<br>(0.02)   | 0.64<br>(0.04)        | 0.19<br>(0.04)    | 0.08<br>(0.04)  | 0.29<br>(0.09)**      | 0.18<br>(0.11)* | 0.29<br>(0.16)    | 0.26<br>(0.04)* | -0.14<br>(0.04) |
| Combined                             | 0.01<br>(0.16)  | -0.03<br>(0.34) | 0.41<br>(0.09)** | -0.19<br>(0.12)*      | 0.40<br>(0.16)**  | 0.13<br>(0.15)  | 0.30<br>(0.30)**      | -0.03<br>(0.42) | 0.15<br>(0.58)**  | 0.15<br>(0.15)  | 0.09<br>(0.16)  |
| <i>Attention</i>                     |                 |                 |                  |                       |                   |                 |                       |                 |                   |                 |                 |
| Mutual                               | -0.04           | 0.10            | 0.12             | 0.78                  | -0.01             | 0.02            | 0.12                  | 0.29            | 0.30              | -0.03           | -0.13           |

|                          | Joint activity  |                 |                  | Groom             |                   |                 | Attention         |                 | Proximity         | Scratch          |                  |
|--------------------------|-----------------|-----------------|------------------|-------------------|-------------------|-----------------|-------------------|-----------------|-------------------|------------------|------------------|
| Behaviour                | Feed            | Rest            | Travel           | Give              | Mutual            | Receive         | present           | absent          |                   | Produced         | Received         |
| attention absent         | (0.08)          | (0.19)          | (0.04)           | (0.07)***         | (0.06)            | (0.06)          | (0.13)            | (0.20)*         | (0.24)**          | (0.07)           | (0.08)*          |
| Mutual attention present | 0.05<br>(0.06)  | 0.004<br>(0.16) | 0.37<br>(0.04)** | -0.11<br>(0.04)*  | 0.63(0.07)**      | 0.21<br>(0.06)  | 0.56<br>(0.14)*** | -0.03<br>(0.17) | 0.26<br>(0.26)*   | 0.53<br>(0.06)*  | 0.05<br>(0.06)   |
| <i>Bodily and manual</i> |                 |                 |                  |                   |                   |                 |                   |                 |                   |                  |                  |
| Bodily                   | 0.067<br>(0.04) | 0.06<br>(0.09)  | 0.50<br>(0.03)*  | 0.22<br>(0.03)*   | 0.58<br>(0.04)**  | 0.25<br>(0.04)* | 0.55<br>(0.09)*** | 0.14<br>(0.12)  | 0.41<br>(0.16)*   | 0.55<br>(0.04)*  | -0.02<br>(0.04)  |
| Manual                   | -0.08<br>(0.09) | -0.01<br>(0.19) | -0.06<br>(0.05)  | 0.29<br>(0.07)*   | -0.07<br>(0.08)   | -0.09<br>(0.08) | -0.02<br>(0.15)   | 0.03<br>(0.23)  | 0.01<br>(0.31)    | -0.18<br>(0.08)* | -0.06<br>(0.08)  |
| <i>Events</i>            |                 |                 |                  |                   |                   |                 |                   |                 |                   |                  |                  |
| Events                   | -0.01<br>(0.03) | 0.04<br>(0.07)  | 0.40<br>(0.02)*  | 0.47<br>(0.03)*   | 0.45<br>(0.03)*   | 0.16<br>(0.02)  | 0.47<br>(0.07)*** | 0.15<br>(0.08)* | 0.37<br>(0.12)*   | 0.36<br>(0.03)*  | -0.07<br>(0.03)  |
| <i>Indicative</i>        |                 |                 |                  |                   |                   |                 |                   |                 |                   |                  |                  |
| Manual indicative        | 0.09<br>(0.41)  | 0.05<br>(1.03)  | 0.43<br>(0.28)*  | 0.17<br>(0.36)*   | 0.56<br>(0.46)*** | 0.17<br>(0.38)* | 0.54<br>(0.95)*** | 0.09<br>(1.11)  | 0.37<br>(1.76)*   | 0.40<br>(0.43)*  | 0.01<br>(0.41)   |
| Manual non-indicative    | -0.08<br>(0.07) | 0.01<br>(0.18)  | 0.04<br>(0.05)   | 0.35<br>(0.06)*   | 0.02<br>(0.07)    | -0.02<br>(0.07) | 0.06<br>(0.14)    | 0.07<br>(0.21)  | 0.08<br>(0.29)    | -0.05<br>(0.07)  | -0.07<br>(0.08)  |
| <i>Proximity</i>         |                 |                 |                  |                   |                   |                 |                   |                 |                   |                  |                  |
| Close                    | 0.05<br>(0.05)  | 0.12<br>(0.12)* | 0.27<br>(0.03)*  | 0.76<br>(0.05)*** | 0.39<br>(0.05)*   | 0.15<br>(0.04)  | 0.50<br>(0.12)*   | 0.29<br>(0.15)* | 0.48<br>(0.21)*** | 0.21<br>(0.05)*  | -0.11<br>(0.05)* |
| Far                      | -0.06<br>(0.04) | -0.05<br>(0.11) | 0.22<br>(0.03)*  | -0.11<br>(0.03)*  | 0.22<br>(0.04)*   | 0.05<br>(0.04)  | 0.13<br>(0.09)*   | -0.07<br>(0.12) | 0.03<br>(0.15)    | 0.24<br>(0.04)*  | 0.01<br>(0.05)   |
| <i>Repetitive</i>        |                 |                 |                  |                   |                   |                 |                   |                 |                   |                  |                  |
| Non-repetitive           | -0.07<br>(0.05) | 0.03<br>(0.10)  | 0.56<br>(0.03)*  | -0.06<br>(0.04)   | 0.73<br>(0.05)*** | 0.21<br>(0.04)* | 0.57<br>(0.10)*   | 0.03<br>(1.36)  | 0.33<br>(0.18)*   | 0.42<br>(0.042)* | 0.05<br>(0.05)   |
| Repetitive               | 0.09<br>(0.05)  | 0.02<br>(0.13)  | -0.09<br>(0.03)  | 0.61<br>(0.05)*** | -0.19<br>(0.04)*  | -0.04<br>(0.04) | -0.01<br>(0.09)   | 0.01<br>(0.13)  | 0.11<br>(0.19)    | -0.01<br>(0.05)  | -0.14<br>(0.05)* |



|                         | Joint activity  |                 |                 | Groom             |                   |                 | Attention         |                 | Proximity         | Scratch           |                  |
|-------------------------|-----------------|-----------------|-----------------|-------------------|-------------------|-----------------|-------------------|-----------------|-------------------|-------------------|------------------|
| Behaviour               | Feed            | Rest            | Travel          | Give              | Mutual            | Receive         | present           | absent          |                   | Produced          | Received         |
| <i>Homogeneity</i>      |                 |                 |                 |                   |                   |                 |                   |                 |                   |                   |                  |
| Heterogeneous           | 0.01<br>(0.08)  | -0.02<br>(0.20) | -0.03<br>(0.05) | 0.11<br>(0.07)    | -0.15<br>(0.08)*  | -0.01<br>(0.08) | -0.09<br>(0.15)*  | 0.04<br>(0.23)  | -0.03<br>(0.30)   | 0.05<br>(0.08)    | -0.03<br>(0.09)  |
| Homogeneous             | -0.01<br>(0.04) | 0.08<br>(0.11)  | 0.43<br>(0.03)* | 0.52<br>(0.04)*   | 0.60<br>(0.05)*** | 0.17<br>(0.04)* | 0.60<br>(0.10)**  | 0.17<br>(0.12)* | 0.45<br>(0.18)*** | 0.38<br>(0.042)*  | -0.08<br>(0.04)  |
| <i>Sequences</i>        |                 |                 |                 |                   |                   |                 |                   |                 |                   |                   |                  |
| Single (no sequence)    | 0.08<br>(0.06)  | 0.08<br>(0.15)  | 0.22<br>(0.04)* | 0.66<br>(0.06)**  | 0.33<br>(0.06)*   | 0.16<br>(0.05)  | 0.47<br>(0.13)*   | 0.23<br>(0.17)* | 0.42<br>(0.25)*** | 0.08<br>(0.05)    | -0.14<br>(0.06)* |
| Rapid sequence          | -0.06<br>(0.19) | -0.03<br>(0.47) | 0.20<br>(0.11)* | 0.03<br>(0.13)    | 0.16<br>(0.17)*   | 0.01<br>(0.16)  | 0.09<br>(0.36)    | -0.01<br>(0.48) | 0.04<br>(0.65)    | -0.02<br>(0.15)   | 0.01<br>(0.19)   |
| Persistence             | -0.03<br>(0.53) | 0.03<br>(1.25)  | 0.14<br>(0.29)* | -0.05<br>(0.38)   | 0.16<br>(0.48)*   | 0.05<br>(0.46)  | 0.09<br>(1.04)    | 0.02<br>(1.49)  | 0.06<br>(1.86)    | 0.57<br>(0.50)*** | 0.06<br>(0.51)   |
| <i>Penile erection</i>  |                 |                 |                 |                   |                   |                 |                   |                 |                   |                   |                  |
| Penile erection         | 0.04<br>(0.22)  | -0.01<br>(0.49) | 0.07<br>(0.14)  | 0.02<br>(0.20)    | -0.04<br>(0.23)   | -0.04<br>(0.21) | -0.01<br>(0.47)   | -0.01<br>(0.62) | -0.01<br>(0.80)   | 0.10<br>(0.22)    | 0.01<br>(0.23)   |
| <i>Piloerection</i>     |                 |                 |                 |                   |                   |                 |                   |                 |                   |                   |                  |
| Piloerection            | -0.04<br>(0.04) | -0.02<br>(0.10) | 0.38<br>(0.03)* | 0.09<br>(0.04)    | 0.42<br>(0.04)*   | 0.14<br>(0.04)  | 0.35<br>(0.10)*   | 0.02<br>(0.13)  | 0.21<br>(0.17)*   | 0.24<br>(0.04)*   | -0.05<br>(0.04)  |
| <i>Gesture function</i> |                 |                 |                 |                   |                   |                 |                   |                 |                   |                   |                  |
| Copulation              | 0.05 (0.31)     | 0.01 (0.84)     | 0.05 (0.18)     | -0.01<br>(0.21)   | 0.01 (0.25)       | -0.02<br>(0.24) | 0.02 (0.53)       | 0.01 (0.84)     | 0.02 (0.99)       | 0.12 (0.27)       | 0.03 (0.34)      |
| Food sharing            | 0.1 (8.36)      | 0.01<br>(23.98) | -0.01<br>(5.05) | -0.01<br>(6.39)   | -0.02<br>(9.54)   | -0.01<br>(6.74) | 0.01 (16.6)       | 0.09 (26.6)     | 0.07<br>(29.25)   | -0.02<br>(7.31)   | -0.07<br>(11.31) |
| Threat to dominate      | -0.5<br>(1.64)* | -0.2 (3.57)     | 0.03 (1.1)      | -0.2 (1.17)       | -0.65<br>(1.45)** | 0.04 (1.29)     | -0.64<br>(2.91)** | 0.1 (4.63)      | -0.29 (5.5)       | 0.19 (1.42)       | 0.01 (1.88)      |
| Give groom              | 0.17<br>(0.13)* | 0.11 (0.31)     | 0.05 (0.07)     | 0.69<br>(0.12)*** | 0.03 (0.11)       | 0.01 (0.1)      | 0.25<br>(0.26)*   | 0.24<br>(0.37)* | 0.3<br>(0.47)**   | 0.1 (0.11)        | -0.15<br>(0.15)* |

| Behaviour                            | Joint activity |              |              | Groom         |               |               | Attention     |               | Proximity     | Scratch       |               |
|--------------------------------------|----------------|--------------|--------------|---------------|---------------|---------------|---------------|---------------|---------------|---------------|---------------|
|                                      | Feed           | Rest         | Travel       | Give          | Mutual        | Receive       | present       | absent        |               | Produced      | Received      |
| Mutually groom                       | 0.66 (2.39)    | 0.1 (6.48)   | 0.03 (1.42)  | -0.1 (1.45)   | 1.14 (1.97)*  | -0.52 (2.01)  | 0.79 (3.97)*  | -0.1 (6.45)   | 0.38 (8.36)   | 0.48 (2.05)   | 0.2 (2.67)    |
| Receive groom                        | 0.47 (0.55)*   | 0.08 (1.44)  | 0.08 (0.32)  | 0.2 (0.33)*   | 0.53 (0.48)** | 0.9 (0.53)**  | 0.51 (0.96)** | 0.38 (1.55)*  | 0.55 (1.95)** | -0.12 (0.46)  | 0.1 (0.6)     |
| Reassurance                          | -0.59 (1.87)   | 0.03 (4.55)  | 0.37 (1.02)  | 0.2 (1.08)    | -0.25 (1.47)  | -0.04 (1.37)  | -0.02 (3.1)   | -0.29 (5.47)  | -0.21 (6.33)  | -0.2 (1.54)   | -0.35 (2.01)  |
| Other threat                         | -0.02 (0.71)   | -0.03 (1.75) | -0.05 (0.39) | -0.06 (0.47)* | -0.03 (0.58)  | 0.02 (0.53)   | -0.01 (1.16)  | -0.05 (2.13)  | -0.03 (2.35)  | 0.48 (0.65)** | 0.02 (0.71)   |
| Synchronized high-intensity panthoot | -0.08 (0.29)   | -0.07 (0.66) | -0.06 (0.14) | 0.03 (0.18)   | 0.01 (0.27)   | -0.02 (0.2)   | -0.07 (0.48)  | -0.09 (0.72)* | -0.1 (0.89)*  | -0.04 (0.23)  | -0.13 (0.31)* |
| Solo high-intensity panthoot         | 0.02 (0.53)    | -0.01 (1.34) | 0.1 (0.3)    | 0 (0.34)      | 0.01 (0.4)    | -0.01 (0.41)  | 0.03 (0.89)   | 0.01 (1.47)   | 0.03 (1.7)    | -0.04 (0.45)  | 0.05 (0.52)   |
| Synchronized low-intensity panthoot  | 0.14 (0.69)*   | 0.05 (2)     | 0.26 (0.45)* | -0.04 (0.44)  | 0.05 (0.58)   | -0.01 (0.6)   | 0.1 (1.25)*   | 0.13 (2.06)*  | 0.14 (2.59)*  | 0.11 (0.59)   | 0.09 (0.67)   |
| Play                                 | -0.19 (0.13)** | -0.04 (0.27) | -0.03 (0.07) | 0.19 (0.09)*  | -0.1 (0.1)*   | -0.2 (0.1)**  | -0.09 (0.24)* | -0.04 (0.33)  | -0.08 (0.4)*  | -0.05 (0.11)  | -0.05 (0.14)  |
| Greeting                             | -0.11 (0.3)    | 0.04 (0.75)  | 0.01 (0.17)  | 0.11 (0.19)*  | -0.05 (0.21)  | -0.08 (0.25)* | -0.02 (0.6)   | 0.04 (0.9)    | 0.01 (1.08)   | 0.07 (0.25)   | 0.08 (0.35)   |
| Travel                               | 0.05 (0.81)    | 0.03 (1.73)  | 0.1 (0.44)*  | 0.1 (0.54)*   | 0.01 (0.73)   | 0.02 (0.55)   | 0.04 (1.33)   | 0.06 (2.13)   | 0.06 (2.56)   | -0.04 (0.6)   | 0.01 (0.83)   |
